# Supplementary material for: The relevance of sustainable laboratory practices
Source: Royal Society of Chemistry journal article supplement (doi:10.1039/d4su00056k), 2024-01-01
Supplement: d4su00056k1.pdf [file d4su00056k1.pdf]

## Supplementary Information

for

# The relevance of sustainable laboratory practices

Thomas Freese,<sup>a</sup> Nils Elzinga,<sup>b</sup> Matthias Heinemann,<sup>c</sup> Michael M. Lerch,<sup>\*a</sup> Ben L. Feringa<sup>\*a</sup>

- a. Stratingh Institute for Chemistry, University of Groningen, Nijenborgh 4, 9747AG Groningen, The Netherlands
- b. Green Office, University of Groningen, Broerstraat 5, 9712 CP Groningen, The Netherlands
- c. Groningen Biomolecular Sciences and Biotechnology Institute, University of Groningen, Nijenborgh 4, 9747 AG Groningen, The Netherlands

E-Mail: [m.m.lerch@rug.nl](mailto:m.m.lerch@rug.nl), [b.l.feringa@rug.nl](mailto:b.l.feringa@rug.nl)

# Table of Contents

|        |                                                                                                                   |    |
|--------|-------------------------------------------------------------------------------------------------------------------|----|
| 1.     | Sustainable laboratory accreditation frameworks .....                                                             | 3  |
| 1.1    | Laboratory Efficiency Assessment Framework (LEAF) .....                                                           | 3  |
| 1.2    | My Green Lab Certification .....                                                                                  | 4  |
| 2.     | Case study of the University of Groningen .....                                                                   | 5  |
| 2.1    | Roadmap Sustainability 2021-2026 (Green Office, Groningen) .....                                                  | 5  |
| 2.1.1  | Ambitions per theme .....                                                                                         | 5  |
| 2.2    | University of Groningen - CO <sub>2</sub> e calculations .....                                                    | 8  |
| 2.2.1  | Environmental performance indicators .....                                                                        | 11 |
| 2.2.2  | Institutional data .....                                                                                          | 12 |
| 2.2.3  | UG's CO <sub>2</sub> e emissions, energy consumption and waste. ....                                              | 13 |
| 2.3    | Faculty of Science and Engineering (FSE) - CO <sub>2</sub> e calculations, electricity, and gas consumption. .... | 16 |
| 2.3.1  | Institutional data .....                                                                                          | 16 |
| 2.3.2  | FSE CO <sub>2</sub> e emissions .....                                                                             | 17 |
| 2.3.3  | FSE electricity and gas consumption .....                                                                         | 18 |
| 2.4    | Travel at the University of Groningen .....                                                                       | 21 |
| 2.4.1  | Introduction .....                                                                                                | 21 |
| 2.4.2  | Results - University .....                                                                                        | 22 |
| 2.4.3  | Results - Faculty and departments .....                                                                           | 23 |
| 2.5    | Health, Safety & Sustainability (HSE) reports FSE .....                                                           | 27 |
| 2.5.1  | HSE report 2021 .....                                                                                             | 27 |
| 2.5.2  | HSE report 2022 .....                                                                                             | 32 |
| 2.6    | FSE is going green .....                                                                                          | 37 |
| 2.6.1  | Feringa Building .....                                                                                            | 40 |
| 2.6.2  | Travel behavior of staff at the Faculty of Science and Engineering .....                                          | 42 |
| 2.6.3  | Food and canteens .....                                                                                           | 50 |
| 2.6.4  | Biodiversity .....                                                                                                | 53 |
| 2.7    | Green Labs RUG .....                                                                                              | 54 |
| 2.7.1  | Recommended structure of a green lab grassroots team .....                                                        | 54 |
| 2.7.2  | Laboratory efficiency assessment framework (LEAF) at FSE .....                                                    | 55 |
| 2.7.3  | Energy measurements, list of equipment, funding .....                                                             | 60 |
| 2.7.4  | Winter break closure 2022-2023 at FSE .....                                                                       | 70 |
| 2.7.5  | Travel data of the authors .....                                                                                  | 74 |
| 2.7.6  | Hazardous waste production at FSE .....                                                                           | 76 |
| 2.7.7  | Marketplace for second-hand laboratory equipment .....                                                            | 80 |
| 2.7.8  | Art from laboratory waste .....                                                                                   | 81 |
| 2.7.9  | Scope 3 - Furniture CO <sub>2</sub> e calculations at FSE .....                                                   | 84 |
| 2.7.10 | Interviews and outreach .....                                                                                     | 86 |
| 3.     | References .....                                                                                                  | 87 |

# 1. Sustainable laboratory accreditation frameworks

## 1.1 Laboratory Efficiency Assessment Framework (LEAF)

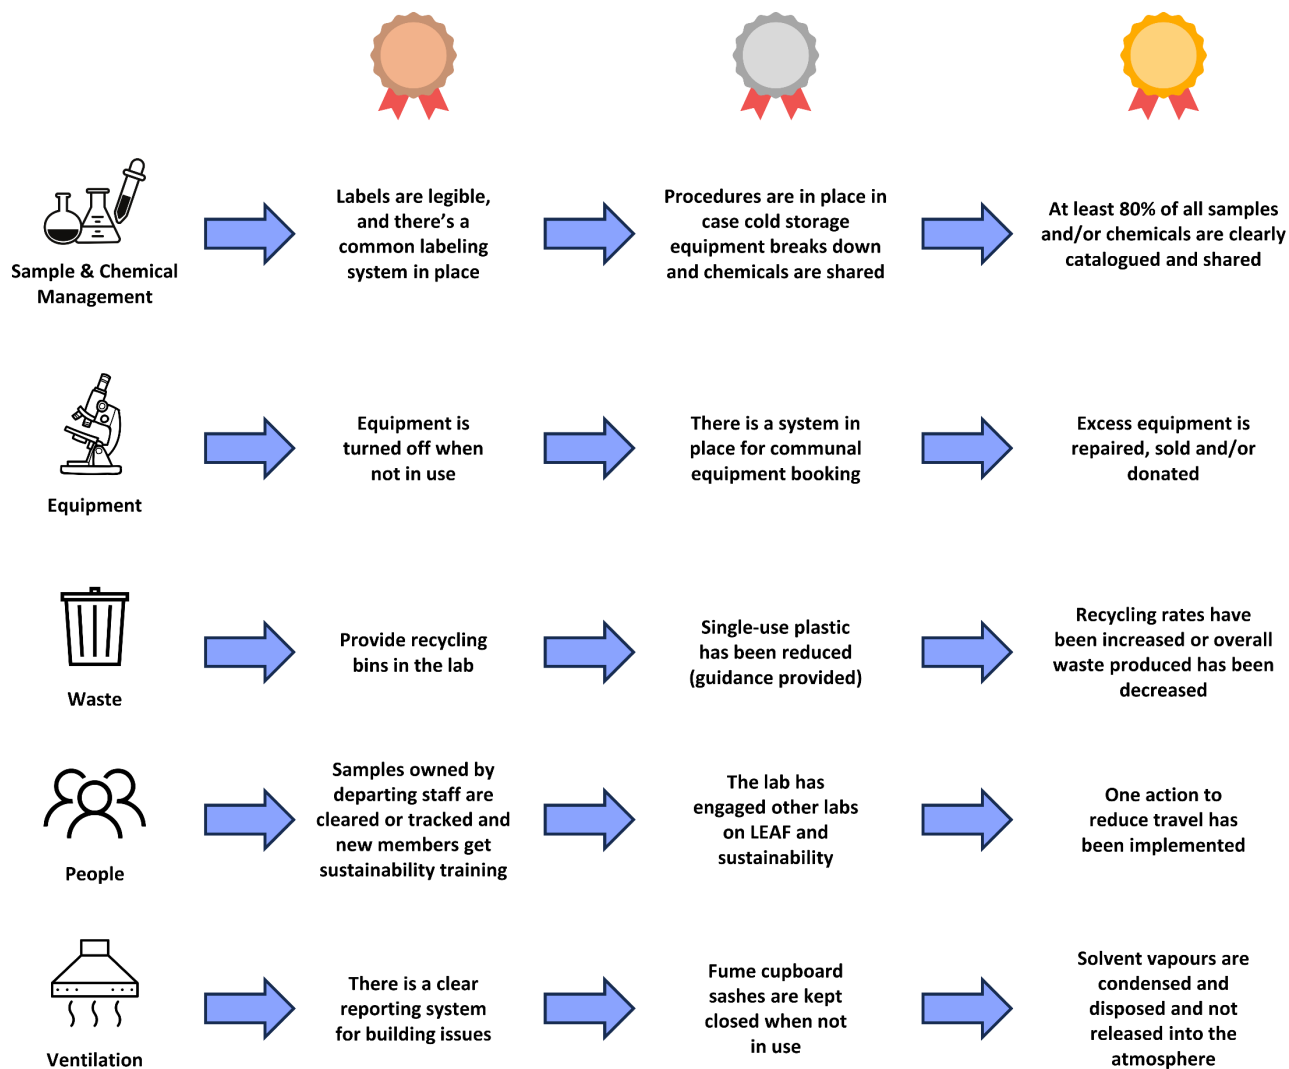

**Figure S1:** Key criteria and different levels of the Laboratory Efficiency Assessment Framework (LEAF); detailed descriptions available upon request at University College London (UCL). Adapted with permission of the UCL and the LEAF developers (<https://www.ucl.ac.uk/sustainable/case-studies/2020/aug/take-part-leaf>).

## 1.2 My Green Lab Certification

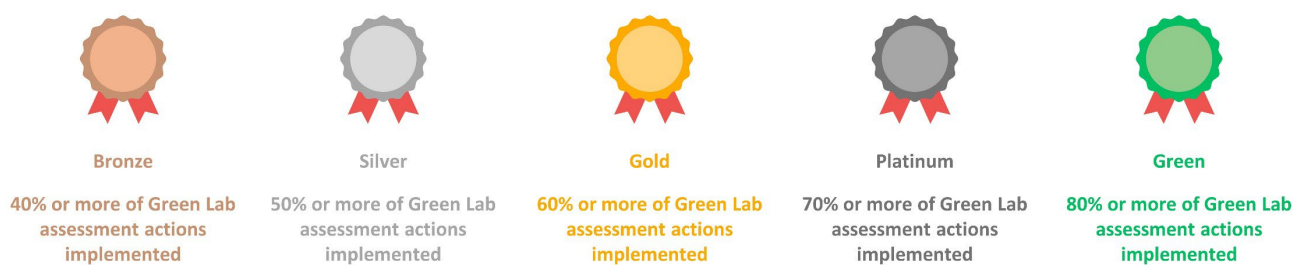

**Figure S2:** Accreditation levels of the My Green Lab certification. More details can be found at: <https://www.mygreenlab.org/green-lab-certification.html>.

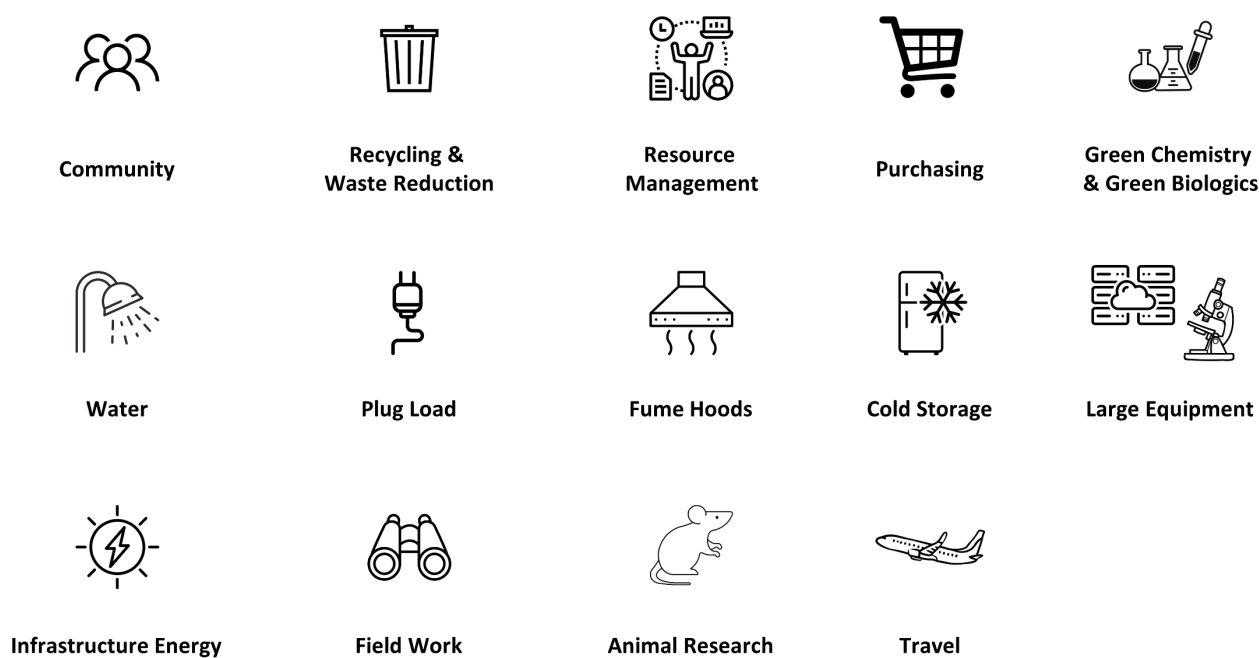

**Figure S3:** Topics covered through the certification process by My Green Labs. More details can be found at: <https://www.mygreenlab.org/green-lab-certification.html/#certificationprocess>.



## 2. Case study of the University of Groningen

### 2.1 Roadmap Sustainability 2021-2026 (Green Office, Groningen)

The following sections are adapted with permission of the Green Office, University of Groningen. The roadmap can be found in more detail at <https://www.rug.nl/about-ug/profile/facts-and-figures/duurzaamheid/roadmap-sustainability>.

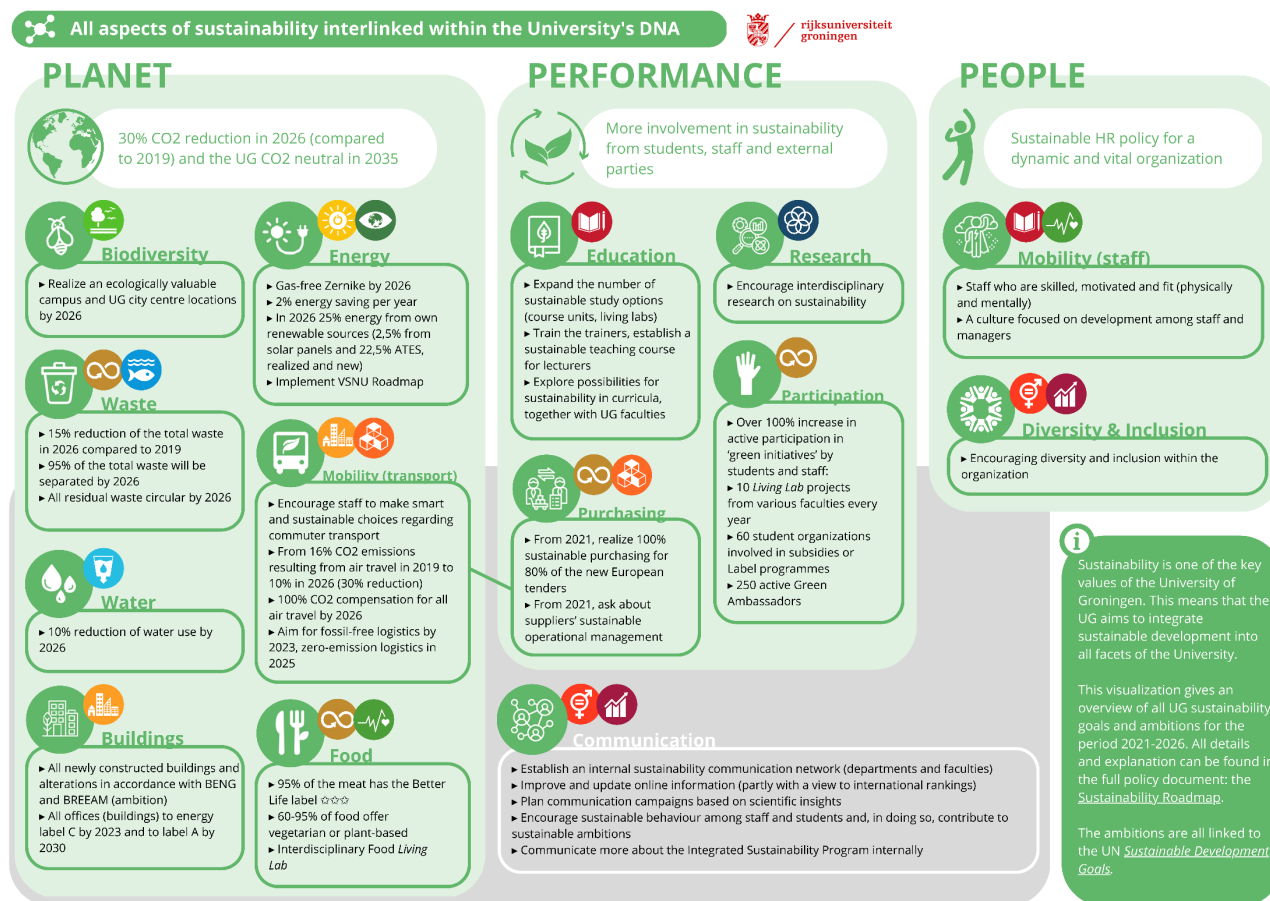

Figure S4: Visualization of the sustainability roadmap 2021-2026 of the UG by the Green Office. Credit: F. W. Nijp (Green Office).

Based on new legislation of the Netherlands' Climate Agreement and the United Nations (UN) Sustainable Development Goals (SDGs), the Green Office, together with various partners within the UG (such as the University Services Department, the Property and Investment Projects department (VGI), the Sustainability Sounding Board, various academics and the HR department), have planned Sustainability Roadmap for the period 2021-2026. The progress will be reported annually and is part of the UG's PDCA (Plan Do Check Act Cycle). The ambitions have once more been formulated for **Planet** (the green side of sustainability), **Performance** (sustainability in teaching and research) and **People** (sustainable employability and development of staff) but are also linked to the United Nations' Sustainable Development Goals.

#### 2.1.1 Ambitions per theme

The following ambitions have been drawn up for the key themes **Planet**, **Performance** and **People** and for Communication. Policies have already been drawn up and a budget has been made available for some of these ambitions. Following approval, the remaining ambitions will be worked on further, in collaboration with the relevant departments or by the Green Office itself.

### 2.1.1.1 Planet

#### UG towards a CO<sub>2</sub>-neutral University by 2035

In May 2019 the Netherlands' Climate Agreement and the sustainability roadmap for Dutch universities was commissioned by the Dutch government and by the Association of Universities in the Netherlands (UNL) (Dutch climate policy: <https://www.government.nl/documents/reports/2019/06/28/climate-agreement>; sustainability roadmap of UNL: <https://www.universiteitenvannederland.nl/en>). The UG will adhere to the goals from the climate agreement for 2030 and 2050, with the ultimate goal of reducing the CO<sub>2</sub> emissions to zero. In 2016, the UG signed the Groningen Energy Neutral 2035 roadmap by the Groningen Municipality (<https://gemeente.groningen.nl/groningen-co2-neutraal-2035>), in which it was agreed that the UG will comply with the Municipality of Groningen's goals of being CO<sub>2</sub> neutral by 2035. This means that the UG must be CO<sub>2</sub> neutral by 2035, irrespective of the VSNU agreements.

From 2021, there will be stricter regulations for newly constructed buildings regarding energy use, with the aim of constructing buildings that are almost energy neutral. In 2050, there must be an energy saving of 27% compared to 2005, while the remaining energy must be generated in accordance with the climate agreement. In doing so, the new ambitions that are listed in **Table S1** will be leading in the UG's new strategic accommodation plan.

**Table S1:** Roadmap ambitions regarding the planet category.

| <b>Ambitions in accordance with the statutory requirements (compliant with the Environmental Protection Act)</b>                                                                                                                                                                                                                                                                                                                                                                                                        |
|-------------------------------------------------------------------------------------------------------------------------------------------------------------------------------------------------------------------------------------------------------------------------------------------------------------------------------------------------------------------------------------------------------------------------------------------------------------------------------------------------------------------------|
| <b>CO<sub>2</sub></b><br>→ 30% CO <sub>2</sub> reduction by 2025 compared to 2019.                                                                                                                                                                                                                                                                                                                                                                                                                                      |
| <b>Energy</b><br>→ In accordance with statutory requirements, 2% energy saving per year.<br>→ All offices (buildings) to energy label C by 2023 and to label A by 2030.<br>→ Newly constructed buildings and alterations in accordance with BENG (almost energy-neutral buildings).                                                                                                                                                                                                                                     |
| <b>UG ambitions (determined based on feasibility)</b>                                                                                                                                                                                                                                                                                                                                                                                                                                                                   |
| <b>CO<sub>2</sub></b><br>→ CO <sub>2</sub> neutral by 2035.<br>→ In 2026, 25% of energy from own renewable sources: <ul style="list-style-type: none"> <li>◆ 2.5% from solar panels.</li> <li>◆ 22.5% ATEs (Aquifer thermal energy storage), realized and new.</li> </ul> → Implement VSNU Roadmap: <ul style="list-style-type: none"> <li>◆ gas-free Zernike by 2026.</li> <li>◆ aim for BREEAM standard 'excellent'.</li> </ul>                                                                                       |
| <b>Waste</b><br>→ By the end of 2026, 95% of the total waste (hazardous and non-hazardous) will be separated.<br>→ 15% reduction of the total waste in 2026 compared to 2019 (from 29 kg to 25 kg per staff member/student).<br>→ All residual waste circular by 2026.                                                                                                                                                                                                                                                  |
| <b>Biodiversity</b><br>→ Realize an ecologically valuable (target species policy) campus and UG city centre locations by 2026.                                                                                                                                                                                                                                                                                                                                                                                          |
| <b>Water</b><br>→ Reduction in the amount of water per user (staff member or student) of 5% in the short term (compared to 2019) and in total 10% in the long term (by 2026).                                                                                                                                                                                                                                                                                                                                           |
| <b>Transport mobility</b><br>→ Encourage staff to make smart and Mobility sustainable choices regarding commuter transport.<br>→ From 16% CO <sub>2</sub> emissions resulting from air travel in 2019 to 10% in 2026 (30% reduction).<br>→ 100% CO <sub>2</sub> compensation for all air travel by 2026.<br>→ Aim for fossil-free logistics by 2023, ahead of the Municipality of Groningen's policy: emission-free logistics by 2025 – extend this proposed municipal policy from the city centre to all UG locations. |
| <b>Food</b><br>→ 95% of the meat has the Better Life label ☆☆☆.<br>→ 60-95% of the food offered in canteens and by catering is vegetarian or plant-based (depending on the location).<br>→ Establish an interdisciplinary Food Living Lab to study and facilitate the transitions to sustainable food systems including plant-based food.                                                                                                                                                                               |
| <b>Hydrogen</b><br>→ Explore the possibilities for the application of hydrogen at Zernike campus.                                                                                                                                                                                                                                                                                                                                                                                                                       |

### 2.1.1.2 Performance

*More involvement in sustainability from students, staff and external parties*

The new goals for teaching and research will be formulated in consultation with the new schools and with that of Sustainable Society in particular (<https://www.rug.nl/rudolf-agricola-school/>). New ambitions have been formulated to encourage bottom-up green initiatives to involve students and staff in making the UG more sustainable: (1) ambassadors who organize activities to make their own faculty more sustainable, (2) green committees; small interdisciplinary groups comprising staff who wish to help solve the specific environmental problems at the UG (e.g. plastic waste in laboratories), (3) study associations that can apply for grants and obtain sustainable labels and (4) GO Living Lab projects whereby students collaborate with GO for curricular projects that are related to sustainability (<https://www.rug.nl/about-ug/profile/facts-and-figures/duurzaamheid/wat-kun-je-doen/samenwerken-in-onderzoek-?lang=en>). Work is in progress on the goals that are listed in the table below.

**Table S2:** Roadmap ambitions regarding the performance category.

|                                                                                                                                                                                                                                                                                                                                                                                                                                                                                                                                                                                                                                                                                                     |
|-----------------------------------------------------------------------------------------------------------------------------------------------------------------------------------------------------------------------------------------------------------------------------------------------------------------------------------------------------------------------------------------------------------------------------------------------------------------------------------------------------------------------------------------------------------------------------------------------------------------------------------------------------------------------------------------------------|
| <b>Teaching</b><br>→ Expand the number of sustainable study options (course units, living labs).<br>→ Train the trainers, establish a sustainable teaching course for lecturers.<br>→ The Sustainability Sounding Board's teaching and research group will start talks with faculties to explore how sustainability can be incorporated more into the curriculum without deviating from the content of the teaching programme.<br>→ Within the new Schools, specific attention will be paid to sustainable teaching, including in the form of interdisciplinary Minors that are yet to be developed and that will be accessible to all UG students.                                                 |
| <b>Research</b><br>→ Encourage interdisciplinary research on sustainability.                                                                                                                                                                                                                                                                                                                                                                                                                                                                                                                                                                                                                        |
| <b>Bottom-up involvement</b><br>→ By 2026, over 100% increase in active participation in 'green initiatives' by students and staff: <ul style="list-style-type: none"><li>◆ 250 active ambassadors and at least four interdisciplinary green committees.</li><li>◆ 60 student organizations involved in subsidies or label programmes.</li><li>◆ 10 Living Lab projects from various faculties every year.</li></ul>                                                                                                                                                                                                                                                                                |
| <b>Purchasing</b><br>→ From 2021, realize 100% sustainable purchasing for 80% of the new European tenders.<br>→ From 2021, ask about suppliers' sustainable operational management: <ul style="list-style-type: none"><li>◆ Appropriate working conditions, by investigating this for 100% of the new tenders and achieving a higher % every year.</li><li>◆ SROI (Social Return on Investment), by investigating this for 100% of the new tenders and achieving a higher % every year.</li><li>◆ Regional purchasing, by requesting a tender from one regional supplier, one preferred supplier and one other supplier for multiple private tenders and achieving a higher % every year.</li></ul> |

### 2.1.1.3 People

*Sustainable HR policy for a dynamic and vital organization*

The University's HR department will be responsible for the sustainable HR policy and its implementation. The key themes are Sustainable Employability and Diversity & Inclusion. The main focus areas of these are listed below.

**Table S3:** Roadmap ambitions regarding the people category.

|                                                                                                                                                                                                         |
|---------------------------------------------------------------------------------------------------------------------------------------------------------------------------------------------------------|
| → Staff who are skilled, motivated and fit (physically and mentally).<br>→ A culture focused on development among staff and managers.<br>→ Encouraging diversity and inclusion within the organization. |
|---------------------------------------------------------------------------------------------------------------------------------------------------------------------------------------------------------|

## 2.2 University of Groningen - CO<sub>2</sub>e calculations

Data on sustainability is tracked by a CO<sub>2</sub> model and calculator created by the Green Office of the University of Groningen. It is used for calculating the carbon footprint of the University. Details and excel calculations are made available upon request.

### Goal

Calculating the organizational carbon footprint is a complex process. The tools available for this are generally not flexible and offer no insight/background information about the calculations or the data obtained after the calculations. As a result, most CO<sub>2</sub> footprint calculations are performed by experts. The tool developed here is intended to offer non-experts the opportunity to calculate a carbon footprint.

### What is a Carbon Footprint

With a carbon footprint, the total amount of greenhouse gas (Greenhouse Gas (GHG)) emissions of a company/institution/person is calculated in tons of CO<sub>2</sub> equivalents (CO<sub>2</sub>e). The Intergovernmental Panel on Climate Change (IPCC) developed the CO<sub>2</sub>e by determining the "Global Warming Potential" (GWP) for all types of emissions. (GWP is the environmental damage caused by 1 kg CO<sub>2</sub> = 1 kgCO<sub>2</sub>e or 1 kg Nitrogen Oxide (NO) = 298 kg CO<sub>2</sub>e). When determining the carbon footprint, we speak in terms of CO<sub>2</sub> that is used as a replacement for CO<sub>2</sub>e. Carbon footprint emissions are classified into 3 focus areas (scopes):

**Scope 1:** direct emissions caused by sources belonging to a company/organisation/person (e.g. emissions from commercial vehicles).

**Scope 2:** defined as emissions that are caused as a result of the activities of a company/organization or person, but are not directly owned and/or controlled by the company/organization or person (e.g. the purchase of non-self-produced electricity).

**Scope 3:** other indirect GHG emissions; this is an optional category in the GHG Protocol, these emissions occur as a consequence of the activities of a company/organization/person. The exact categories that are included in this model for each scope are explained and defined in the reporting information section.

Specifically for the University of Groningen the following list are the emission sources that are included in each scope. It explains the calculations, emission factors, data and assumptions taken for each source, which should be included in applicable sustainability reports.

For **scope 1**:

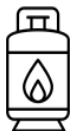

**Natural Gas:** Natural gas is the largest emission source for the UG.

Source: <https://co2emissiefactoren.nl> (2020)

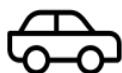

**Company transport:** These are the emissions of the fleet of cars that the UG owns and operates. The calculation is performed by multiplying the total liters of fuel used in the cars for each fuel type by their relevant emission factor.

Source: <https://co2emissiefactoren.nl> (2021)

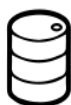

**Refrigerants:** Refrigerants have a GWP between 2000-4500 and are therefore required to be in the Carbon Footprint. Typically, the consumed amounts are very low compared to other categories. In the last five years, refrigerants had a 0 impact on the total emissions of the UG.

Source: <https://co2emissiefactoren.nl> (2021)

For **scope 2**:

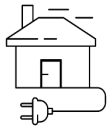

**Purchased electricity:** Since 2018, the UG only purchases green energy in the Netherlands which has an emission factor of 0.

Source: <https://co2emissiefactoren.nl> (2020)

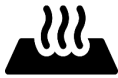

**Purchased heat:** The UG purchases some heat, which is multiplied by the relevant emission factor, the impact is very small compared to the total impact of the UG.

Source: <https://co2emissiefactoren.nl> (2016)

The following list includes the emission sources that are included in **scope 3** explaining the calculations, emission factors, data and assumptions taken for each source.

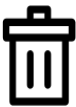

**Waste:** The model uses five waste categories: plastic, organic, paper, residual and hazardous waste. Each has its own emission factor. There exist many more categories of waste (TU Delft uses around 15 for example), but these five are the most significant for the UG.

Sources: previous model version (2015), TU Delft climate report (2019 & 2020 - <https://www.tudelft.nl/en/2021/tu-delft/tu-delft-maps-own-co2-emissions-in-detail>)

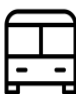

**Commuting (employees & students):** The CO<sub>2</sub>-emissions of commuting are estimated for both students and employees. Important to note here is that most transport in Groningen involves green transport sources (biking, electric buses & public/ national trains by NS).

**Employees:** The calculation for employee commuting uses the number of full-time equivalents (FTEs), in combination with an assumption on the amount of working days per week and a total of 46 work weeks per year. In order to then calculate the actual emissions, an estimation is made about the percentage use of different transportation types (*i.e.* green transport, bus, car, *etc.*), and the corresponding distance that is travelled. This is multiplied by two (return trip) and combined with the data on FTEs, workdays and work weeks to calculate the final number.

**Students:** The calculation for students is similar to that of employees. We use the number of students, the number of days that they attend the University in person and the amount of working weeks in a year (40). And combine this with estimations on transport types and distances again. Sources: <https://co2emissiefactoren.nl> (2020 & 2021)

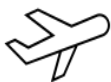

**International travel (employees):** For calculating the impact international travel of employees, the total amount of flight km's are multiplied with emission factors for flying. A distinction is made between regional and intercontinental flights because the kg CO<sub>2</sub> emission per flight km factor depends on the total length of a single flight. Also, international train km's are added in the 2022 model, since it also impacts carbon emissions.

Source: <https://co2emissiefactoren.nl> (2015)

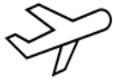

**Student exchange travel:** To estimate the impact of student exchange travel, we use the number of students going on exchange in a year (or an estimation). Following, these students are ordered by the continent of their exchange (using an estimation in % per continent). Each continent has its own emission factor, which is based on an assumption about the transport mode (car, train, flight) and data for each transport. In addition, the distance for each continent is fixed to a central point in the continent, which gives the amount of travel Km's. We assume a return journey with no stop-overs for flights.

Sources: <https://co2emissiefactoren.nl> (2015)

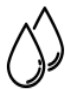

**Purchased resources (water):** Currently, the only purchased resource in the model is water. The amount of water used by the UG is multiplied by the relevant emission factor.

Source: <https://co2emissiefactoren.nl>, via the previous version of the model (2015)

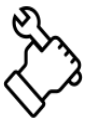

**Purchased services:** Currently, the model incorporates two types of purchased resources: data storage & construction. The reliability of the emission factors for these categories is low and should be taken with caution. The UG mainly uses data storage providers that pledges to be carbon neutral. The environmental impact of construction projects can be huge, but the reliability of data associated with them is low. It is advised to improve gathered data in future planning.

**Data storage:** Data storage is split up in two categories: green storage and non-green storage. Green storage is used by Microsoft and Google, non-green storage includes all other providers (<https://www.google.com/about/datacenters/cleanenergy/> and <https://www.microsoft.com/en-us/sustainability/energy>)

Source: <https://www.wired.com/story/amazon-google-microsoft-green-clouds-and-hyperscale-data-centers/> & <https://medium.com/stanford-magazine/carbon-and-the-cloud-d6f481b79dfe>

**Construction:** The existing data for construction emissions is currently too unreliable, emission factors are therefore set to 0. Construction projects can have a very large impact, so more reliable data needs to be acquired in the future.

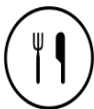

**Food emissions:** The food emission calculation depends on the availability of the data. The most reliable calculation would use data on the amounts of food consumed per food type in Kg, obtained from the food supplier. If this data is missing, an alternative calculation can be used that is based on the number of breakfasts/lunches/meals consumed in an entire year.

**Food data per kg:** The impact of the food is calculated by splitting up all food types in 30+- different food categories that have roughly similar emissions. The amounts of foods consumed for each category (in Kg) are then multiplied by the relevant emission factor for each of these categories. The data is obtained from [www.foodfootprint.nl](http://www.foodfootprint.nl) and based on Dutch market average data from the RIVM (2021, <https://www.rivm.nl/en/dutch-national-food-consumption-survey>).

*Note: Keep in mind that consumption of products can be grouped into categories and that one of the products mentioned below can serve as the overall conversion factor of the category since their conversion factor is equal or nearly equal.*

**Food data per meal:** Alternatively, an estimation can be made on the total amounts of meals (breakfasts/lunches/dinners) consumed at the UG catering facilities in a year. These values are then multiplied by the average impact of a Dutch breakfast/lunch/dinner. These averages are based on data from the Voedingscentrum. There is also an option to put in a vegetarian lunch/dinner, which have lower emissions.

Sources: [www.foodfootprint.nl](http://www.foodfootprint.nl) (2021, based on RIVM data), Voedingscentrum.

### 2.2.1 Environmental performance indicators

The Health, Safety, and the Environment Service (AMD) of the University of Groningen have developed a set of Environmental Performance Indicators (EPIs) to measure environmental performance. The EPIs enable comparison of the environmental performance of buildings, faculties or even universities and commercial companies. Since 1996, the University of Groningen has recorded these EPIs, enabling the formulation of new environmental performance aims.

#### Emission factors:

The emission factor categories match the input categories mentioned above. The input data is converted to CO<sub>2</sub> emissions *via* emission factors.

<https://www.co2emissiefactoren.nl/>

(main source used by organizations for scope 1, 2, 3 data from the Netherlands)

<https://foodfootprint.nl/>

(contains all food data (based on RIVM data from 2021))

<https://www.tudelft.nl/2021/tu-delft/tu-delft-brengt-eigen-co2-uitstoot-gedetailleerd-in-kaart>

(TU Delft emission report of 2020, which contains some specific scope 1, 2, 3 data that is not included on [www.co2emissiefactoren.nl](https://www.co2emissiefactoren.nl/))



## 2.2.2 Institutional data

**Table S4:** Institutional data of the University of Groningen in 2023. Adapted with permission from the Green Office, UG, from <https://www.rug.nl/about-ug/profile/facts-and-figures/>.

| Category         | Type                                                      | Value                    | Unit           |
|------------------|-----------------------------------------------------------|--------------------------|----------------|
| Business context | Name of company                                           | University of Groningen  | -              |
|                  | Institutional sector                                      | Education                | -              |
|                  | Reference year                                            | 2022                     | year           |
|                  | Country of residence                                      | Netherlands              | -              |
|                  | Foundation year                                           | 1614                     | year           |
| Business data    | Number of employees                                       | 6390                     | #              |
|                  | Number of FTEs external employees                         | 0                        | #              |
|                  | Number of academic staff (FTE)                            | 3750 (40% international) | #              |
|                  | Number of full professors                                 | 400 (24% female)         | #              |
|                  | Number of PhD candidates                                  | 4400 (52% international) | #              |
|                  | Number of PhD theses                                      | 640                      | #              |
|                  | Number of research publications (excluding dissertations) | 8500                     | #              |
|                  | Number of patents                                         | 14                       | #              |
|                  | Number of students                                        | 36681                    | #              |
|                  | Number of international students                          | 9900                     | #              |
|                  | Number of faculties                                       | 11                       | #              |
|                  | Number of alumni                                          | 140 000                  | #              |
|                  | Number of Master's degree programs                        | 120                      | #              |
|                  | Number of Bachelor's degree programs                      | 45                       | #              |
|                  | Total Gross Floor Surface (GFS) of company ground         | 8.54E+05                 | m <sup>2</sup> |
|                  | Total Gross Floor Surface (GFS) of company buildings      | 462651                   | m <sup>2</sup> |
|                  | Number of company buildings (estimate)                    | 120                      | #              |
| Number of cars   | 3                                                         | #                        |                |

### Disclaimer:

Due to missing numbers the carbon emissions of the University of Groningen are underestimated. The University strives to complete these numbers in the upcoming years. The electricity used is not necessarily produced green (*via* wind or solar) as it is delivered through Vattenfall® (<https://www.vattenfall.nl/>). The UG decides to buy green certificates produced through wind- and solar energy by vertiCer® (<https://verticer.eu/nl/>) to compensate for its footprint: From 2018 onwards 100% of the energy was compensated through these certificates until including 2022. However, in 2023 the number of green energy certificates were reduced to cover only 50% of the total energy consumption.

### Included in the calculation:

**Scope 1:** gas, transport, refrigerants

**Scope 2:** electricity, heating

**Scope 3:**

- waste (residual, plastic, organic, paper, disposable coffee cup, electronic waste, glass waste, hazardous waste, other separated waste)
- student commuting
- employee commuting
- employee international travel (flights, international train, car)
- water consumption
- food and canteens
- office furniture of the Faculty of Science and Engineering

### Missing data in Scope 3:

- student exchange travel
- buildings and construction work
- furniture, IT, computers, and office equipment of other faculties
- high precision instruments, devices and laboratory equipment



## 2.2.3 UG's CO<sub>2</sub>e emissions, energy consumption and waste.

Detailed information on UG's policies on aspects such as travel, mobility, food, waste, buildings, energy can be found at <https://www.rug.nl/about-ug/profile/facts-and-figures/duurzaamheid/beleid/>. The following data is adapted from these published reports.

**Table S5:** CO<sub>2</sub>e emissions of the University of Groningen in the years of 2015-2022 and progress overview. Adapted from the calculations of the Green Office, UG.

| Year                                         | 2015       |           | 2016       |           | 2017       |           | 2018       |           | 2019       |           | 2020       |           | 2021       |           | 2022       |           |
|----------------------------------------------|------------|-----------|------------|-----------|------------|-----------|------------|-----------|------------|-----------|------------|-----------|------------|-----------|------------|-----------|
|                                              | w/o offset | w/ offset | w/o offset | w/ offset | w/o offset | w/ offset | w/o offset | w/ offset | w/o offset | w/ offset | w/o offset | w/ offset | w/o offset | w/ offset | w/o offset | w/ offset |
| <b>Total emissions</b>                       | 69 716     | 69 716    | 64 064     | 64 064    | 64 389     | 49 213    | 64 078     | 33 669    | 61 829     | 32 275    | 37 069     | 10 292    | 37 946     | 11 543    | 48 362     | 20 417    |
| <b>Scope 1</b>                               | 8120       | -         | 8726       | -         | 8626       | -         | 8245       | -         | 8076       | -         | 7706       | -         | 9055       | -         | 7307       | -         |
| <b>Scope 2</b>                               | 31 090     | 0         | 30 991     | 0         | 16 067     | 15 176    | 844        | 30 409    | 806        | 29 554    | 685        | 26 776    | 795        | 26 403    | 578        | 27 944    |
| <b>Scope 3</b>                               | 30 506     | -         | 24 347     | -         | 24 520     | -         | 24 580     | -         | 23 393     | -         | 1902       | -         | 1693       | -         | 12 532     | -         |
| <b>Emissions per publication (FSE)</b>       | n/a        | n/a       | n/a        | n/a       | 173        | 132       | n/a        | n/a       | 159        | 83        | n/a        | n/a       | n/a        | n/a       | 97         | 41        |
| <b>Emissions per employee (6390)</b>         | 11         | 11        | 10         | 10        | 10         | 8         | 10         | 5         | 10         | 5         | 6          | 2         | 6          | 2         | 8          | 3         |
| <b>Emissions per m<sup>2</sup> (462 651)</b> | 0.15       | 0.15      | 0.14       | 0.14      | 0.14       | 0.11      | 0.14       | 0.07      | 0.13       | 0.07      | 0.08       | 0.02      | 0.08       | 0.02      | 0.10       | 0.04      |
| <b>Electricity</b>                           | 30 307     | 0         | 30 133     | 0         | 15 181     | 15 176    | 0          | 30 409    | 0          | 29 554    | 0          | 26 776    | 0          | 26 403    | 0          | 27 944    |
| <b>Gas, heat, refrig.</b>                    | 8873       | -         | 9533       | -         | 9479       | -         | 9064       | -         | 8856       | -         | 8372       | -         | 9835       | -         | 7796       | -         |
| <b>Direct fuels</b>                          | 30         | -         | 51         | -         | 33         | -         | 25         | -         | 26         | -         | 19         | -         | 16         | -         | 89         | -         |
| <b>Food and canteens</b>                     | 5790       | -         | 5874       | -         | 5916       | -         | 6236       | -         | 6241       | -         | 312        | -         | 312        | -         | 6239       | -         |
| <b>Commuting</b>                             | 18 014     | -         | 12 304     | -         | 12 392     | -         | 13 032     | -         | 12 546     | -         | 449        | -         | 488        | -         | 2774       | -         |
| <b>Air travel</b>                            | 5977       | -         | 5420       | -         | 5463       | -         | 4664       | -         | 3944       | -         | 649        | -         | 339        | -         | 2932       | -         |
| <b>Purchased services</b>                    | 0.00       | -         | 0          | -         | 0          | -         | 0          | -         | 0          | -         | 0          | -         | 0          | -         | 0          | -         |
| <b>Purchased goods, water, furniture</b>     | 419        | -         | 421        | -         | 426        | -         | 339        | -         | 335        | -         | 322        | -         | 329        | -         | 330        | -         |
| <b>Waste</b>                                 | 306        | -         | 328        | -         | 324        | -         | 309        | -         | 327        | -         | 170        | -         | 225        | -         | 258        | -         |

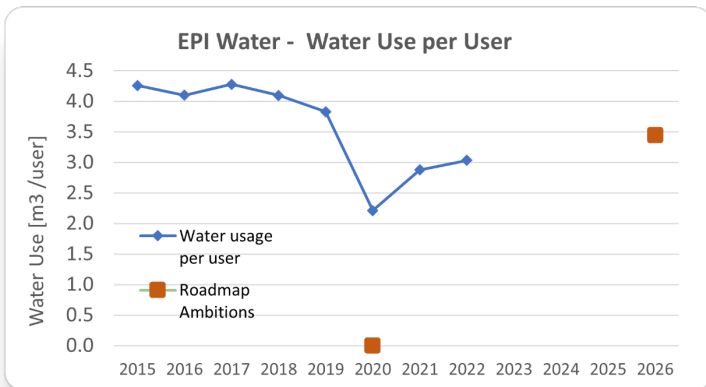

10% reduction of water use by 2026.

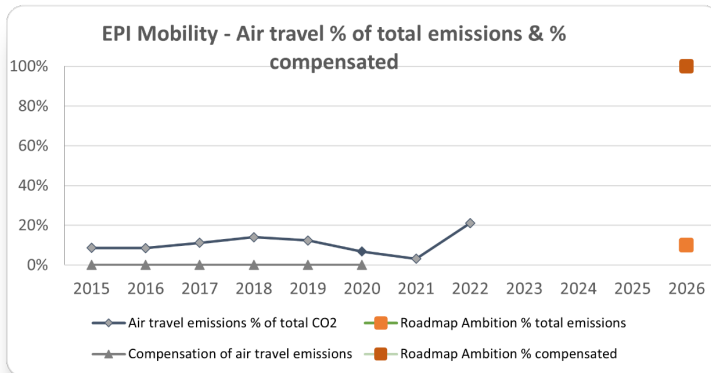

From 16% CO<sub>2</sub> emissions resulting from air travel in 2019, to 10% in 2026 (30% reduction).  
100% CO<sub>2</sub> compensation for all air travel by 2026.

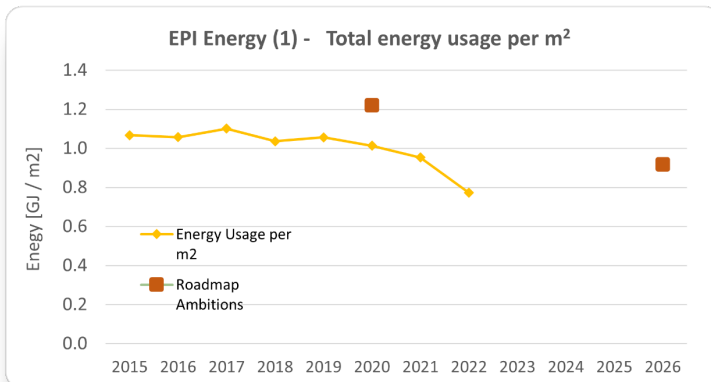

2% reduction of energy usage per year.  
25% of energy from own renewable sources.  
2.5% from solar panels.

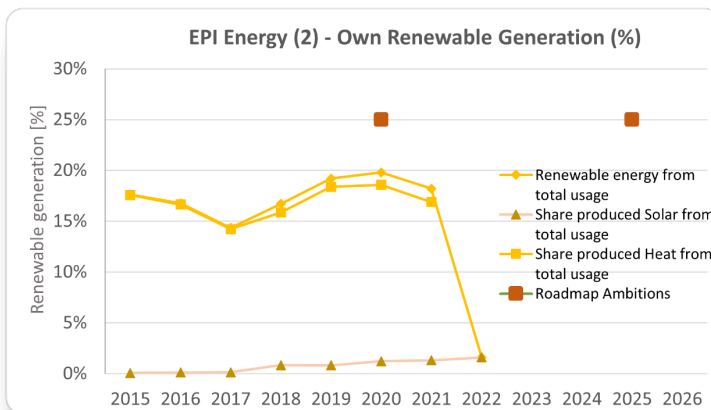

Figure S5: Water, mobility and electricity progress and targets.

## Non-hazardous waste

Given that the layout of many buildings does not allow to use a large enough waste disposal container to collect the waste flows separately, bags are transported separately *via* large container. Once they have been taken to the collection point, they are taken out and thus separated again by waste flow. Plastic and residual waste are the exception. Rather than being separated, they are sent to the same company for processing.

More information on waste separation can be found at: <https://www.rug.nl/about-ug/profile/facts-and-figures/duurzaamheid/beleid/afval> and <https://www.rug.nl/society-business/facility-services/afvalbeleid?lang=en>.

**Table S6:** Waste separation bin at the UG.

|                    | This <u>should</u> go in                                                                                                                                                                                                 | This <u>should not</u> go in (and goes, except for glass, in other waste)                                                                                                                  |
|--------------------|--------------------------------------------------------------------------------------------------------------------------------------------------------------------------------------------------------------------------|--------------------------------------------------------------------------------------------------------------------------------------------------------------------------------------------|
| paper              | <ul style="list-style-type: none"> <li>Dry and clean paper</li> <li>Newspapers &amp; notebooks</li> <li>Window envelopes</li> <li>Clean tissues</li> </ul>                                                               | <ul style="list-style-type: none"> <li>Dirty / wet paper</li> <li>Drink cartons</li> <li>Greasy pizza boxes</li> <li>Sandwich wrappings from the canteen</li> </ul>                        |
| plastics           | <ul style="list-style-type: none"> <li>Clean plastic bags / bowls / yoghurt cups*</li> </ul> <p><small>* Scraped empty is sufficient. It does not need to be rinsed with water.</small></p>                              | <ul style="list-style-type: none"> <li>Fruit nets (e.g. mandarines)</li> <li>Chips bags</li> <li>Aluminum packaging</li> <li>Cans</li> <li>Pens</li> <li>Bowls with food scraps</li> </ul> |
| organic food waste | <ul style="list-style-type: none"> <li>Fruit and vegetable waste</li> <li>Food scraps</li> </ul>                                                                                                                         | <ul style="list-style-type: none"> <li>Tea bags</li> <li>Food scraps in wrappings or containers</li> </ul>                                                                                 |
| other waste        | <ul style="list-style-type: none"> <li>Dirty packaging</li> <li>Aluminum packaging (chips bags, granola bar wrappings)</li> <li>Everything you're unsure about</li> <li>Everything with a paper / plastic mix</li> </ul> | <ul style="list-style-type: none"> <li>Glass</li> </ul>                                                                                                                                    |
| cups               | <ul style="list-style-type: none"> <li>Empty coffee cups</li> </ul>                                                                                                                                                      | <ul style="list-style-type: none"> <li>Coffee cups with liquid in it</li> <li>Coffee cups with other waste in it</li> <li>Soup bowls from the canteen</li> </ul>                           |

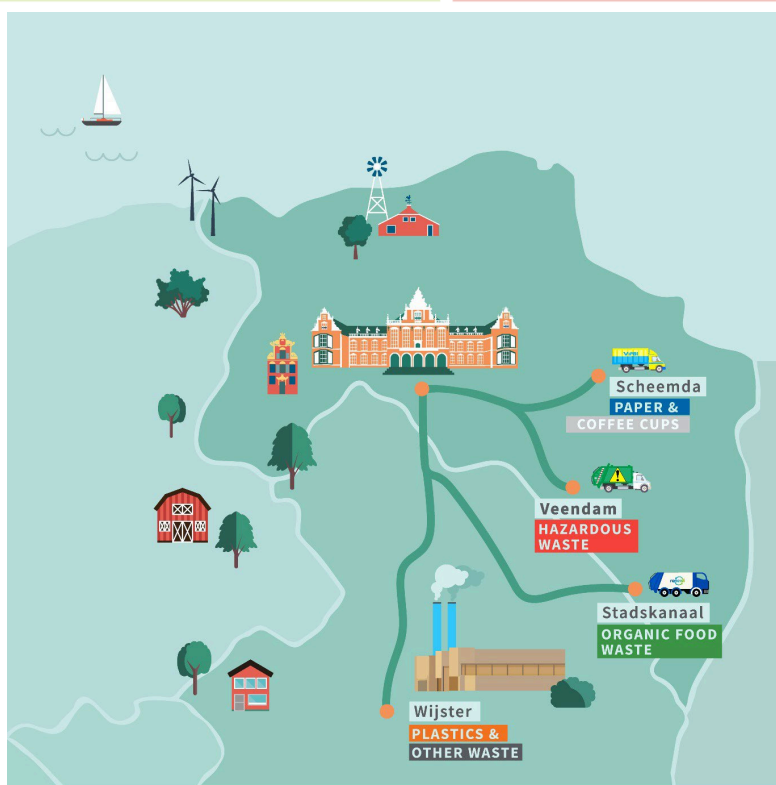

**Figure S6:** The university's waste separation, collection sites and processing companies and their locations in 2023. *Reproduced with permission from the Green Office, UG.*

## 2.3 Faculty of Science and Engineering (FSE) - CO<sub>2</sub>e calculations, electricity, and gas consumption.

### 2.3.1 Institutional data

**Table S7:** Institutional data, size, area and number of employees of FSE and each building.

| Category                               | Type                                                       | Value                              | Unit           |
|----------------------------------------|------------------------------------------------------------|------------------------------------|----------------|
| Business context                       | Name of company                                            | Faculty of Science and Engineering | -              |
|                                        | Institutional sector                                       | Education and research             | -              |
|                                        | Reference year                                             | 2023                               | year           |
|                                        | Country of residence                                       | Netherlands                        | -              |
| Business data                          | Number of employees                                        | 2889                               | #              |
|                                        | Number of active lab researchers                           | 1762                               | #              |
|                                        | Senior staff                                               | 318 (11%)                          | #              |
|                                        | Junior research staff (PhD, postdocs, technicians)         | 1300 (45%)                         | #              |
|                                        | Teachers/lecturers                                         | 145 (5%)                           | #              |
|                                        | Temporary unemployed staff (guest researchers)             | 462 (16%)                          | #              |
|                                        | Support staff                                              | 665 (23%)                          | #              |
|                                        | Total Gross Floor Surface (GFS) of company buildings (NVO) | 140 782                            | m <sup>2</sup> |
|                                        | Total Gross Floor Surface (GFS) of company buildings (FNO) | 94 950                             | m <sup>2</sup> |
|                                        | Total Gross Floor Surface (GFS) of company buildings (WO)  | 80 067                             | m <sup>2</sup> |
|                                        | Number of lab spaces                                       | 557                                | #              |
| Number of company buildings (estimate) | 9                                                          | #                                  |                |

| Building           | Area (m <sup>2</sup> )       | Area (m <sup>2</sup> )      | Area (m <sup>2</sup> )      |
|--------------------|------------------------------|-----------------------------|-----------------------------|
|                    | NVO                          | FNO                         | WO                          |
| Nijenborgh 4 (NB4) | 49 944                       | 32 272                      | 28 468                      |
| Linnaeusborg (NB7) | 37 772                       | 25 373                      | 21 084                      |
| Bernoulliborg      | 12 295                       | 8591                        | 5889                        |
| EAE                | 12 032                       | 6040                        | 4775                        |
| ZL25               | 12 450                       | 7576                        | 5530                        |
| Herdershut         | 506                          | 389                         | 151                         |
| Lutjewad           | 175                          | 169                         | 43                          |
| A. Deusinglaan     | 10 871                       | 10 871                      | 10 871                      |
| FEB                | 4738                         | 3669                        | 3256                        |
| <b>Sum</b>         | <b>140 782 m<sup>2</sup></b> | <b>94 950 m<sup>2</sup></b> | <b>80 067 m<sup>2</sup></b> |

| BVO                    | NVO                    | NO                            |                                           | FNO                                                            |                   | VVO                          |
|------------------------|------------------------|-------------------------------|-------------------------------------------|----------------------------------------------------------------|-------------------|------------------------------|
| Bruto vloeroppervlakte | Netto vloeroppervlakte | Nuttig vloeroppervlakte       | Afdeling vloeroppervlakte                 | Vloeroppervlakten van werkplekken, inclusief circulatieruimte  | 50% <sup>1)</sup> | Verhuurbaar vloeroppervlakte |
|                        |                        |                               |                                           | Supplementaire afdelingsruimte                                 | 5% <sup>1)</sup>  |                              |
|                        |                        |                               |                                           | Speciale ruimten, kantine, archief, vergaderruimte, repro      | 15% <sup>1)</sup> |                              |
|                        |                        |                               |                                           | Sanitaire ruimten, werkkasten, garderobe                       |                   |                              |
|                        |                        |                               |                                           | Verkeersruimte (gangen, trappenhuizen, liften, entree, hallen) | 20% <sup>1)</sup> |                              |
|                        |                        | Technische installatieruimten |                                           |                                                                |                   |                              |
|                        |                        |                               | Constructieoppervlakte (wanden, kolommen) |                                                                | 10% <sup>1)</sup> |                              |

<sup>1)</sup> De in de rechterkolommen gegeven waarden zijn indicatief

### 2.3.2 FSE CO<sub>2</sub>e emissions

All data on the energy, electricity and gas consumption per faculty can be obtained from <https://rug.erbis.nl/>. The following sections are adapted and calculated through D. Jager, N. Elzinga and T. Freese and are published with permission of the Faculty of Science and Engineering, University of Groningen.

**Table S8:** CO<sub>2</sub>e emissions of FSE in the years 2017, 2019 and 2022, correlated to number of publications (Source: Scopus and Pure), employees and area.

| Year                                         | 2017       |           | 2019       |           | 2022       |           |
|----------------------------------------------|------------|-----------|------------|-----------|------------|-----------|
| Category (CO <sub>2</sub> e tons)            | w/o offset | w/ offset | w/o offset | w/ offset | w/o offset | w/ offset |
| <b>Total emissions</b>                       | 28 255     | 22 978    | 26 642     | 16 700    | 25 419     | 15 996    |
| <b>Scope 1</b>                               | 5017       | -         | 4466       | -         | 4236       | -         |
| <b>Scope 2</b>                               | 10 862     | 5585      | 10 214     | 271       | 9618       | 271       |
| <b>Scope 3</b>                               | 12 376     | -         | 11 963     | -         | 11 564     | -         |
| <b># of publications at FSE</b>              | 372        |           | 390        |           | 498        |           |
| <b>Emissions per publication (FSE)</b>       | 76         | 62        | 68         | 43        | 51         | 32        |
| <b>Emissions per employee (2889)</b>         | 10         | 8         | 9          | 6         | 9          | 6         |
| <b>Emissions per m<sup>2</sup> (140 782)</b> | 0.20       | 0.16      | 0.19       | 0.12      | 0.18       | 0.11      |
| <b>Electricity</b>                           | 10 554     | 5277      | 9943       | 0         | 9423       | 0.00      |
| <b>Gas, heat, refriger.</b>                  | 5310       | -         | 4725       | -         | 4413       | -         |
| <b>Direct fuels</b>                          | 15         | -         | 12         | -         | 18         | -         |
| <b>Food and canteens</b>                     | 2675       | -         | 2822       | -         | 2821       | -         |
| <b>Commuting</b>                             | 5603       | -         | 5672       | -         | 5637       | -         |
| <b>Air travel</b>                            | 2036       | -         | 1457       | -         | 1149       | -         |
| <b>Purchased services</b>                    | 0          | -         | 0          | -         | 0          | -         |
| <b>Purchased goods, water, furniture</b>     | 377        | -         | 322        | -         | 319        | -         |
| <b>Waste</b>                                 | 88         | -         | 92         | -         | 40         | -         |

### 2.3.3 FSE electricity and gas consumption

**Table S9:** Electricity and gas consumption of FSE from 2014 – 2023. Normalized gas usage per temperature degree days measured in Eelde.

| Year | Electricity usage per year (kWh) | Gas usage per year (m <sup>3</sup> ) | Temperature degree days in Eelde, 01.01 until 31.12. | Gas usage per year / temperature degree days (m <sup>3</sup> / temperature degree day) |
|------|----------------------------------|--------------------------------------|------------------------------------------------------|----------------------------------------------------------------------------------------|
| 2014 | 22 827 268                       | 1 978 348                            | 2656.26                                              | 744.79                                                                                 |
| 2015 | 22 995 709                       | 2 383 369                            | 2886.40                                              | 825.72                                                                                 |
| 2016 | 23 088 363                       | 2 537 471                            | 3062.20                                              | 828.64                                                                                 |
| 2017 | 23 412 207                       | 2 650 570                            | 2937.90                                              | 902.20                                                                                 |
| 2018 | 23 072 079                       | 2 459 234                            | 2895.69                                              | 849.27                                                                                 |
| 2019 | 23 394 175                       | 2 360 201                            | 2840.69                                              | 830.85                                                                                 |
| 2020 | 21 607 915                       | 2 320 715                            | 2732.35                                              | 849.35                                                                                 |
| 2021 | 22 974 499                       | 2 698 832                            | 3053.15                                              | 883.95                                                                                 |
| 2022 | 22 390 579                       | 2 234 141                            | 2765.34                                              | 807.91                                                                                 |
| 2023 | 20 800 040                       | 1 968 902                            | 2698.22                                              | 729.70                                                                                 |

**Table S10:** Monthly electricity consumption at FSE from 2019 – 2023.

| Electricity usage per month (kWh) | 2019              | 2020              | 2021              | 2022              | 2023              |
|-----------------------------------|-------------------|-------------------|-------------------|-------------------|-------------------|
| Jan                               | 2 125 407         | 2 069 513         | 2 076 099         | 1 980 005         | 1 845 972         |
| Feb                               | 1 922 753         | 1 914 191         | 1 872 175         | 1 829 056         | 1 747 838         |
| Mar                               | 2 113 221         | 1 911 268         | 2 016 038         | 2 010 771         | 1 940 200         |
| Apr                               | 1 892 935         | 1 528 089         | 1 897 199         | 1 849 245         | 1 719 319         |
| May                               | 1 919 025         | 1 659 662         | 1 876 851         | 1 879 707         | 1 775 522         |
| Jun                               | 1 830 311         | 1 784 979         | 1 833 445         | 1 837 297         | 1 730 038         |
| Jul                               | 1 901 399         | 1 619 741         | 1 879 311         | 1 835 135         | 1 696 247         |
| Aug                               | 1 890 149         | 1 590 643         | 1 832 733         | 1 830 914         | 1 657 700         |
| Sep                               | 1 869 985         | 1 829 063         | 1 838 885         | 1 775 835         | 1 626 315         |
| Oct                               | 1 978 193         | 1 889 016         | 1 917 018         | 1 830 467         | 1 709 920         |
| Nov                               | 1 939 352         | 1 849 950         | 1 932 644         | 1 848 522         | 1 704 063         |
| Dec                               | 2 011 444         | 1 961 801         | 2 002 101         | 1 883 626         | 1 646 907         |
| <b>Sum</b>                        | <b>23 394 174</b> | <b>21 607 916</b> | <b>22 974 499</b> | <b>22 390 580</b> | <b>20 800 041</b> |

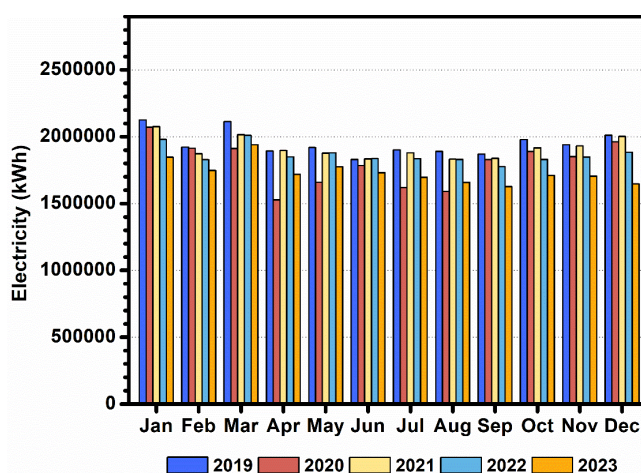

**Figure S7:** Monthly correlation of electricity usage at FSE in kWh from 2019-2023. Adapted with permission from the Faculty of Science and Engineering, source: <https://rug.erbis.nl/>.

**Table S11:** Monthly correlation of gas consumption at FSE of the years 2019-2023.

| Gas usage per month (m <sup>3</sup> ) | 2019             | 2020             | 2021             | 2022             | 2023             |
|---------------------------------------|------------------|------------------|------------------|------------------|------------------|
| Jan                                   | 366 810          | 301 452          | 403 473          | 339 874          | 274 853          |
| Feb                                   | 255 094          | 286 962          | 345 449          | 301 368          | 239 325          |
| Mar                                   | 256 159          | 296 131          | 324 114          | 296 918          | 253 418          |
| Apr                                   | 205 448          | 200 656          | 303 239          | 226 982          | 202 231          |
| May                                   | 174 840          | 176 137          | 207 214          | 131 232          | 136 730          |
| Jun                                   | 76 917           | 84 827           | 77 326           | 81 361           | 68 710           |
| Jul                                   | 77 528           | 90 332           | 61 287           | 63 494           | 61 251           |
| Aug                                   | 59 245           | 54 587           | 77 604           | 51 648           | 50 236           |
| Sep                                   | 104 531          | 102 864          | 94 370           | 103 672          | 52 873           |
| Oct                                   | 188 554          | 182 919          | 197 065          | 125 148          | 135 528          |
| Nov                                   | 301 989          | 229 220          | 268 598          | 209 390          | 228 478          |
| Dec                                   | 293 085          | 314 628          | 339 094          | 303 055          | 265 269          |
| <b>Sum</b>                            | <b>2 360 200</b> | <b>2 320 715</b> | <b>2 698 833</b> | <b>2 234 142</b> | <b>1 968 902</b> |

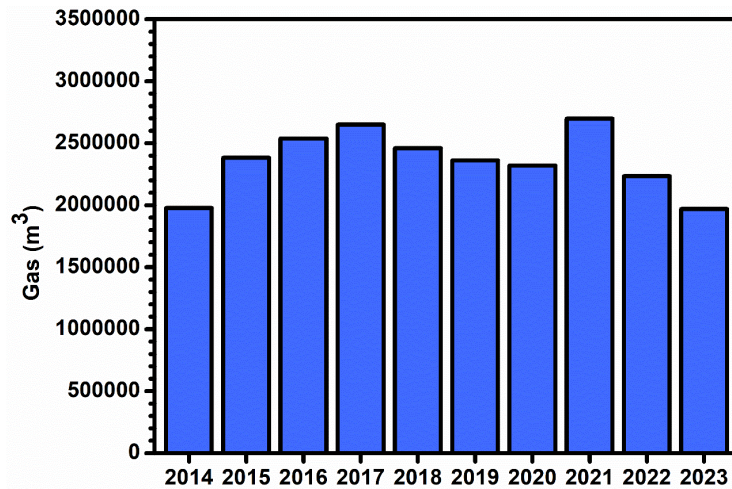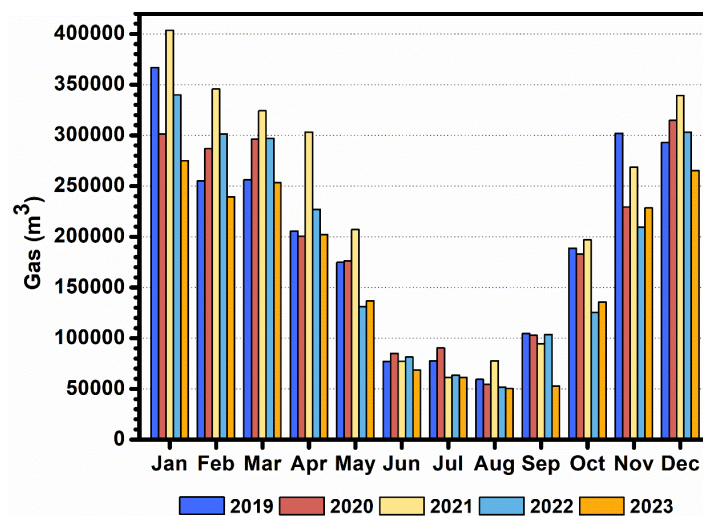

**Figure S8:** Gas consumption in m<sup>3</sup> at the Faculty of Science and Engineering from 2014-2023 (top). Monthly correlation of gas consumption at FSE of the years 2019-2023 (bottom). Although activity on the campuses was reduced in 2020 and 2021 (COVID-19), research practices and laboratory work continued. Instead of applying a full lock-down, researchers worked in shifts. Thus, the energy consumption as well as heating (gas usage) continued. Also, air ventilation (i.e. electricity) was increased to allow for a safe working environment. Adapted with permission from the Faculty of Science and Engineering, source: <https://rug.erbis.nl/>.



**Table S12:** Baseload energy consumption of all science buildings at FSE versus the usage by the users, *i.e.* running the building (heating, cooling, ventilation, lighting etc.) versus the activities in the building (science activities, instrument use, computers etc.).

| Baseload energy consumption             | Gas (m <sup>3</sup> ) | Electricity (kWh) |
|-----------------------------------------|-----------------------|-------------------|
| Nov-22                                  | 209390                | 1848522           |
| Feb-23                                  | 239325                | 1747838           |
| Average                                 | 224357.5              | 1798180           |
| Winter break 2022 (two weeks, no users) | 102333                | 798977            |
| Normalization to a month (4 weeks)      | 204666                | 1597954           |
| <b>Baseload energy consumption</b>      | <b>91.2%</b>          | <b>88.9%</b>      |

We furthermore calculated, the baseload energy consumption of all science buildings at FSE versus the usage by the users, *i.e.* running the building (heating, cooling, ventilation, lighting etc.) versus the activities in the building (science activities, instrument use, computers etc.). By utilizing the data from the 2022 winter break (see **Section 2.7.4**) and normalizing to 4 weeks, we could compare the energy consumption in November 2022 and February 2023 (*i.e.* with users at similar outside temperatures, thus degree days as December/January) with the winter break (*i.e.* no users) to estimate the baseload energy consumption. It should be noted that air ventilation and fume hoods were not yet reduced or turned off, resembling still numbers associated to ‘user activities’:

**Laboratories:**

Temperature within *generally climate-controlled* laboratories will be reduced to a technically minimal and responsible level. Ventilation is not being adjusted.

Ventilation and room temperature of *specifically climate-controlled* areas, such as climate cells, laser laboratories, animal facilities etc. remain unchanged.

**Offices:**

Ventilation and the room temperature in offices will be reduced to a technically minimal and responsible level.

**Both laboratories and offices:**

All staff are requested to switch off all equipment, including computers, that can be safely switched off during the winter holiday closure.

At the Faculty of Science and Engineering the baseload energy consumption was calculated at 91.2% for gas usage and 88.9% for electricity usage. We furthermore consulted an energy & sustainability advisor, indicating that the baseload energy usage averages at 80%, thus 20% of energy consumption is usually associated to users. Other institutions show that about 75% of energy for a science building is used in just keeping the building operational (*i.e.* the Estates Department responsibility) and that about 25% is due to the activity of the researchers. Such knowledge allows for directing of funds and efforts to maximize sustainability impact.



## 2.4 Travel at the University of Groningen

### Analysis of travel data 2016-2022

#### 2.4.1 Introduction

Data of business travel of the University of Groningen (UG) have been recorded in annual reports of the travel agent since 2016. The data files that are provided by the travel agent contain:

- The departure and destination of flights;
- The total distance of the flight;
- The CO<sub>2</sub> emissions related to the flight.

Regarding the last point, it is unclear how the travel agent calculated this. It is also not clear whether or not the emissions include only the emissions of carbon dioxide, or if it encapsulates all emissions (and hence represents the emissions in CO<sub>2</sub> equivalents). Lastly, it is unknown if different emissions for business and economy class flights are accounted for. Since business class seats take up more space on an airplane, they cause the plane to transport passengers with lower efficiency, leading to higher emissions per passenger. Business class tickets cause 1.3 to 4 times as much emissions as economy class.<sup>1,2</sup> For the sake of transparency and consistency, we will therefore calculate the CO<sub>2</sub> emissions from flights by using the same emission factors that are used in the CO<sub>2</sub> footprint program of the UG. These are listed in **Table S13** below.

**Table S13:** Flight distance categories and emission factors.

| Type   | Distance      | Emission factor<br>(g CO <sub>2</sub> e km <sup>-1</sup> ) |
|--------|---------------|------------------------------------------------------------|
| Short  | < 800 km      | 300                                                        |
| Middle | 800 - 2500 km | 200                                                        |
| Long   | > 2500 km     | 150                                                        |

Analysis of the flight data is conducted because the total emissions due to business travel by airplane need to be recorded to calculate the annual CO<sub>2</sub> footprint of the University. It is also used to estimate the impact of the newly updated travel policy of the UG will have in terms of emission reduction, and to calculate a CO<sub>2</sub> budget for each faculty/department.

The data files provided for each year do not all contain the same data. For the years 2016 and 2020, only a summarized version was available, where only the total number of flights, flight distance and emissions were reported. For other years the file contained information on each individual flight that was booked. In this category, 2018 stood out as it only listed the distance and emission of each flight. The remaining years (2017, 2019, 2021 and 2022) contained complete information of each flight and also mentioned through which department the flight was booked. Thus, in parts of this analysis, only the years 2017, 2019 and 2022 were utilized. 2021 is omitted in these cases due to COVID-19 pandemic measures.

## 2.4.2 Results - University

**Table S14** depicts the distribution of short, middle- and long-distance flights in terms of the number of flights, the distance, and the emissions:

1. The short flights (*i.e.* the flights that are affected by the UG business travel policy) cause less than 10% of the total emissions;
2. The long flights, which account for ~30% of the total number of flights, contribute to approximately 70% of the total emissions.

**Table S14:** Distribution of different flight types over the total number of flights, distance, and emissions.

|        | Number | Distance | Emissions |
|--------|--------|----------|-----------|
| Short  | 28.1%  | 4.9%     | 9.4%      |
| Middle | 42.2%  | 18.1%    | 22.4%     |
| Long   | 29.8%  | 77.0%    | 68.2%     |

**Table S15:** Most visited countries per year and the number of trips taken to that country.

| Entry | 2017           |     | 2019           |     | 2022           |     | Total          |      |
|-------|----------------|-----|----------------|-----|----------------|-----|----------------|------|
| 1     | United States  | 670 | United Kingdom | 603 | Italy          | 477 | United States  | 1542 |
| 2     | United Kingdom | 656 | United States  | 519 | United States  | 353 | United Kingdom | 1527 |
| 3     | China          | 515 | Italy          | 459 | Spain          | 327 | Italy          | 1318 |
| 4     | Italy          | 382 | Spain          | 286 | United Kingdom | 268 | Spain          | 966  |
| 5     | Spain          | 353 | Germany        | 198 | Portugal       | 221 | China          | 714  |
| 6     | Germany        | 226 | China          | 185 | Greece         | 177 | Germany        | 542  |
| 7     | France         | 218 | France         | 166 | Thailand       | 139 | France         | 495  |
| 8     | Switzerland    | 213 | Switzerland    | 153 | Ireland        | 120 | Portugal       | 495  |
| 9     | Denmark        | 150 | Philippines    | 149 | Germany        | 118 | Switzerland    | 463  |
| 10    | Austria        | 146 | Portugal       | 145 | France         | 111 | Greece         | 384  |

### 2.4.3. Results - Faculty and departments

**Figure S9** depicts the total flight distance per faculty or department and the figure in the main article shows the distance divided by the total number of employees of that faculty or department (expressed in FTEs). An overview of the number of FTEs (permanent appointments) for each faculty/department was requested at the HR-department of the University. Note that for Campus Fryslân was founded in 2018, resulting in lower carbon emissions. Both figures (main article and ESI) are sorted in ascending order of the 2022 data.

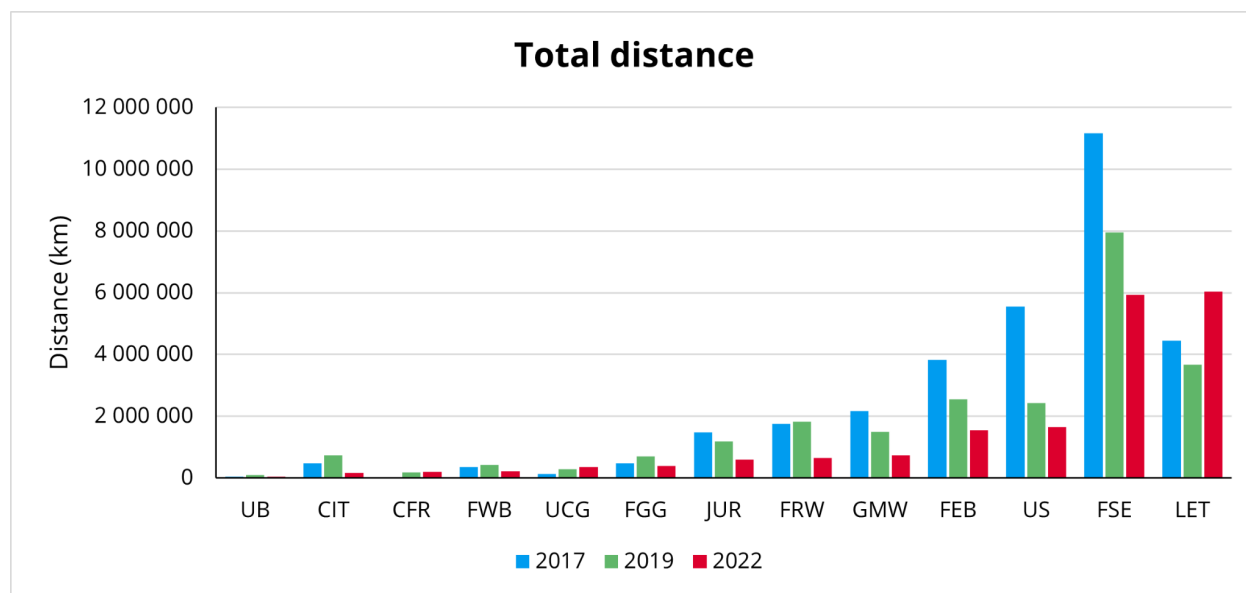

**Figure S9:** Total flight distance of each faculty or department of UG.

**Table S16:** List of abbreviations of faculties and departments.

|     |                                                                                                                                                                                                           |
|-----|-----------------------------------------------------------------------------------------------------------------------------------------------------------------------------------------------------------|
| CFR | Campus Fryslân                                                                                                                                                                                            |
| CIT | Center for Information Technology                                                                                                                                                                         |
| FEB | Faculty of Economy and Business                                                                                                                                                                           |
| FGG | Faculty of Theology and Religious Studies (from Sep 2023: Fac. of Religion, Culture and Society)                                                                                                          |
| FRW | Faculty of Spatial Sciences                                                                                                                                                                               |
| FSE | Faculty of Science and Engineering                                                                                                                                                                        |
| FWB | Faculty of Philosophy                                                                                                                                                                                     |
| GMW | Faculty Behavioural and Social Sciences                                                                                                                                                                   |
| JUR | Faculty of Law                                                                                                                                                                                            |
| LET | Faculty of Arts                                                                                                                                                                                           |
| UB  | University Library                                                                                                                                                                                        |
| UCG | University College Groningen                                                                                                                                                                              |
| US  | University Services<br>i Since October 2022 the following departments were fused to form one support organization: Facility Management, Property and Investment Projects and the Bureau of the University |

**Acknowledgements:** The travel data has been adapted with permission from the Green Office, University of Groningen and we greatly acknowledge G. Boesjes (Green Office) for collection and interpretation of data. The following images on the air travel data have been reproduced with permission of the Green Office and data visualized through M. van den Boom (prev. Green Office).

## AIRTRAVEL BUREAU OF THE UNIVERSITY

The **Green Office** has analyzed the University's flight data of the past few years. This document provides an overview of our findings for your department.

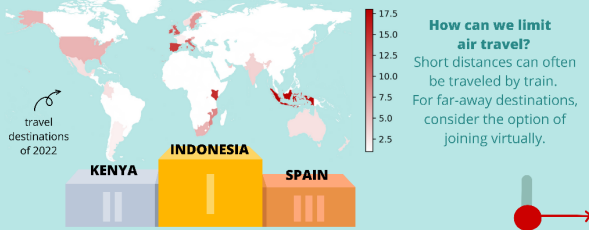

**How can we limit air travel?**  
Short distances can often be traveled by train. For far-away destinations, consider the option of joining virtually.

With the new Travel Policy, we can reduce CO2 emissions by **85 tonnes**, which is equal to the CO2 emissions coming from the yearly electricity consumption of **55 households** (NL).

The average distance travelled by plane per employee of the Bureau was **3362 km** in 2022. This is **434 km less** than the average distance travelled by UG employees.

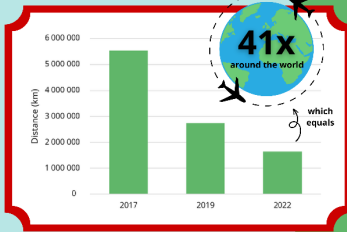

Scan the QR-code for more info and a detailed report!

TOTAL FLIGHT DISTANCE PER YEAR

greenoffice

## AIRTRAVEL CAMPUS FRYSLÂN

The **Green Office** has analyzed the University's flight data of the past few years. This document provides an overview of our findings for your department.

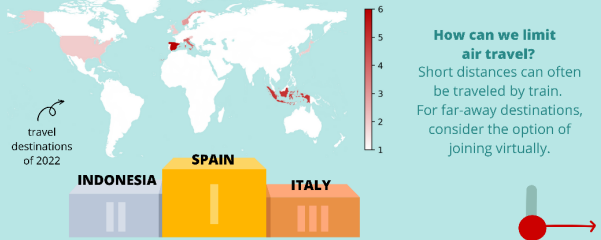

**How can we limit air travel?**  
Short distances can often be traveled by train. For far-away destinations, consider the option of joining virtually.

With the new Travel Policy, we can reduce CO2 emissions by **85 tonnes**, which is equal to the CO2 emissions coming from the yearly electricity consumption of **55 households** (NL).

The average distance travelled by plane per employee of Campus Fryslân was **3512 km** in 2022. This is **498 km less** than the average distance travelled by UG employees.

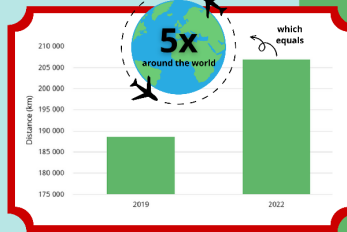

Scan the QR-code for more info and a detailed report!

TOTAL FLIGHT DISTANCE PER YEAR

greenoffice

## AIRTRAVEL CENTER FOR INFORMATION TECHNOLOGY

The **Green Office** has analyzed the University's flight data of the past few years. This document provides an overview of our findings for your department.

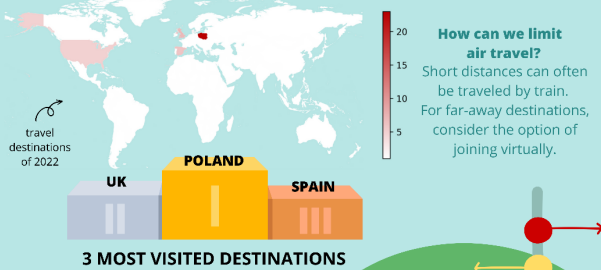

**How can we limit air travel?**  
Short distances can often be traveled by train. For far-away destinations, consider the option of joining virtually.

With the new Travel Policy, we can reduce CO2 emissions by **85 tonnes**, which is equal to the CO2 emissions coming from the yearly electricity consumption of **55 households** (NL).

The average distance travelled by plane per employee of the CIT was **684 km** in 2022. This is **3326 km less** than the average distance travelled by UG employees.

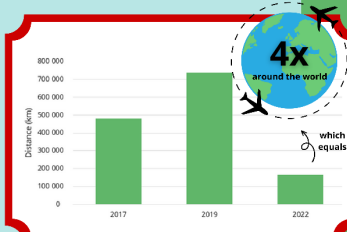

Scan the QR-code for more info and a detailed report!

TOTAL FLIGHT DISTANCE PER YEAR

greenoffice

## AIRTRAVEL FACULTY OF ECONOMICS & BUSINESS

The **Green Office** has analyzed the University's flight data of the past few years. This document provides an overview of our findings for your department.

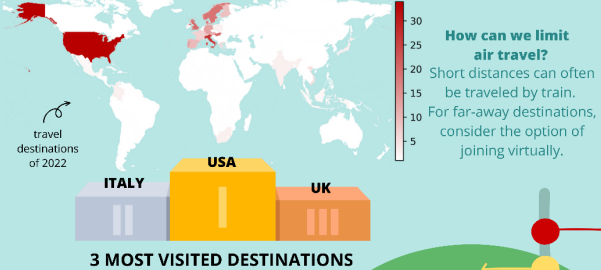

**How can we limit air travel?**  
Short distances can often be traveled by train. For far-away destinations, consider the option of joining virtually.

With the new Travel Policy, we can reduce CO2 emissions by **85 tonnes**, which is equal to the CO2 emissions coming from the yearly electricity consumption of **55 households** (NL).

The average distance travelled by plane per employee of the FEB was **3076 km** in 2022. This is **934 km less** than the average distance travelled by UG employees.

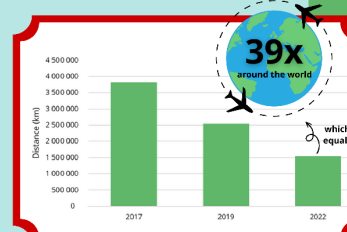

Scan the QR-code for more info and a detailed report!

TOTAL FLIGHT DISTANCE PER YEAR

greenoffice

## AIRTRAVEL FAC. OF THEOLOGY & RELIGIOUS STUDIES

The **Green Office** has analyzed the University's flight data of the past few years. This document provides an overview of our findings for your department.

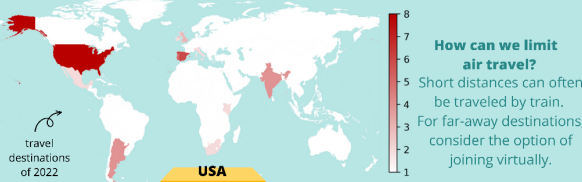

### How can we limit air travel?

Short distances can often be traveled by train. For far-away destinations, consider the option of joining virtually.

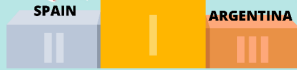

With the new Travel Policy, we can reduce CO2 emissions by **85 tonnes**, which is equal to the CO2 emissions coming from the yearly electricity consumption of **55 households (NL)**.

The average distance travelled by plane per employee of the faculty was **9203 km** in 2022. This is **5193 km more** than the average distance travelled by UG employees.

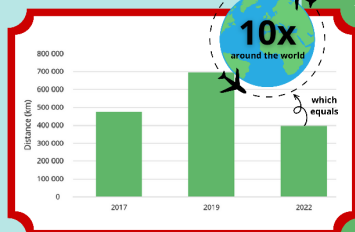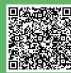

Scan the QR-code for more info and a detailed report!

greenoffice

## AIRTRAVEL FACULTY OF SPATIAL SCIENCES

The **Green Office** has analyzed the University's flight data of the past few years. This document provides an overview of our findings for your department.

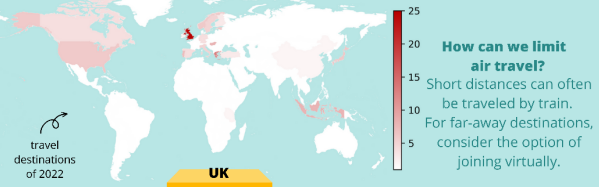

### How can we limit air travel?

Short distances can often be traveled by train. For far-away destinations, consider the option of joining virtually.

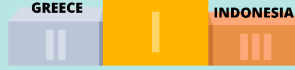

With the new Travel Policy, we can reduce CO2 emissions by **85 tonnes**, which is equal to the CO2 emissions coming from the yearly electricity consumption of **55 households (NL)**.

The average distance travelled by plane per employee of the FSS was **6200 km** in 2022. This is **2190 km more** than the average distance travelled by UG employees.

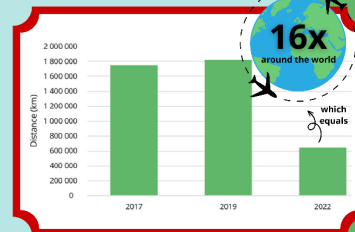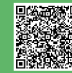

Scan the QR-code for more info and a detailed report!

greenoffice

## AIRTRAVEL FACULTY OF SCIENCE & ENGINEERING

The **Green Office** has analyzed the University's flight data of the past few years. This document provides an overview of our findings for your department.

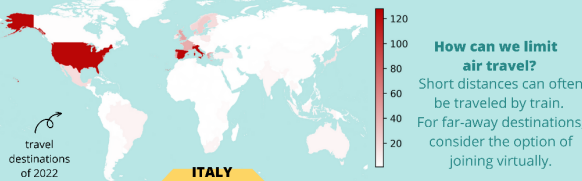

### How can we limit air travel?

Short distances can often be traveled by train. For far-away destinations, consider the option of joining virtually.

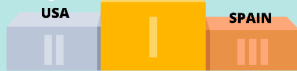

With the new Travel Policy, we can reduce CO2 emissions by **85 tonnes**, which is equal to the CO2 emissions coming from the yearly electricity consumption of **55 households (NL)**.

The average distance travelled by plane per employee of the FSE was **4100 km** in 2022. This is **91 km more** than the average distance travelled by UG employees.

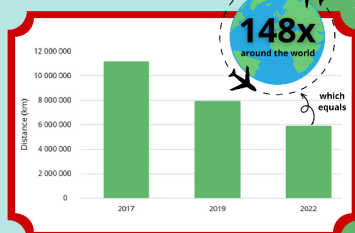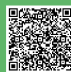

Scan the QR-code for more info and a detailed report!

greenoffice

## AIRTRAVEL FACULTY OF PHILOSOPHY

The **Green Office** has analyzed the University's flight data of the past few years. This document provides an overview of our findings for your department.

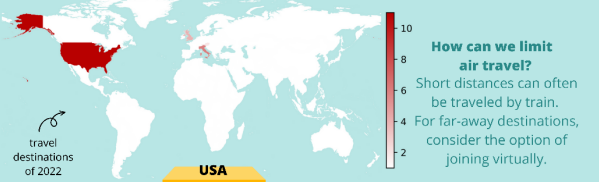

### How can we limit air travel?

Short distances can often be traveled by train. For far-away destinations, consider the option of joining virtually.

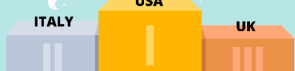

With the new Travel Policy, we can reduce CO2 emissions by **85 tonnes**, which is equal to the CO2 emissions coming from the yearly electricity consumption of **55 households (NL)**.

The average distance travelled by plane per employee of the Fac. of Philosophy was **3431 km** in 2022. This is **579 km less** than the average distance travelled by UG employees.

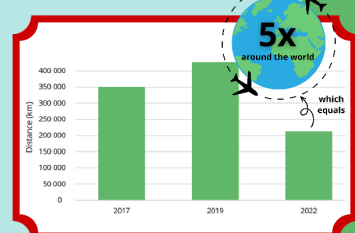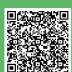

Scan the QR-code for more info and a detailed report!

greenoffice

## AIRTRAVEL FAC. OF BEHAVIOURAL & SOCIAL SCIENCES

The Green Office has analyzed the University's flight data of the past few years. This document provides an overview of our findings for your department.

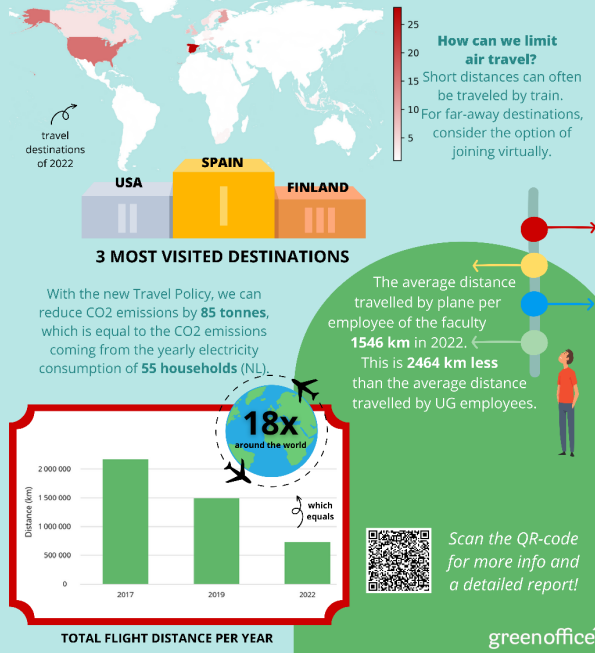

## AIRTRAVEL FACULTY OF LAW

The Green Office has analyzed the University's flight data of the past few years. This document provides an overview of our findings for your department.

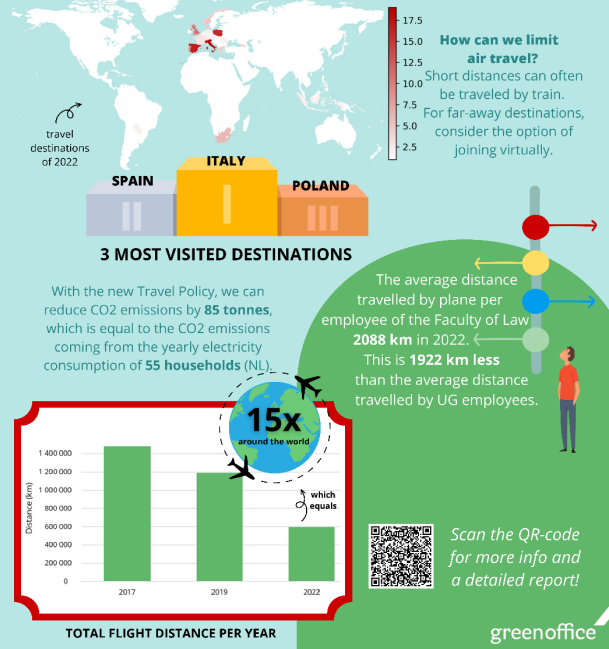

## AIRTRAVEL FACULTY OF ARTS

The Green Office has analyzed the University's flight data of the past few years. This document provides an overview of our findings for your department.

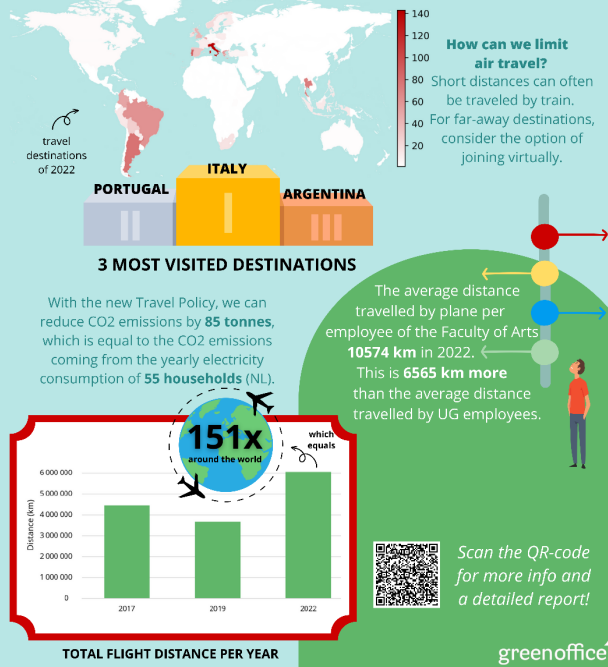

## AIRTRAVEL UNIVERSITY COLLEGE GRONINGEN

The Green Office has analyzed the University's flight data of the past few years. This document provides an overview of our findings for your department.

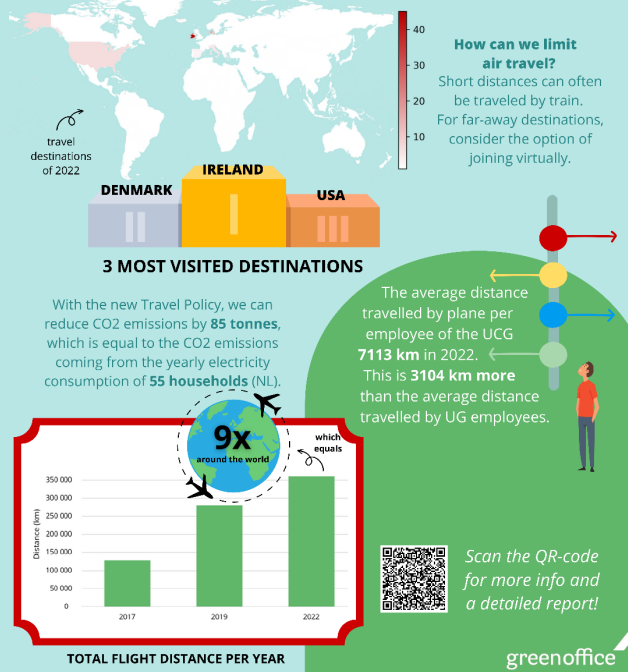



## 2.5 Health, Safety & Sustainability (HSE) reports FSE

### 2.5.1 HSE report 2021

#### 2.5.1.1 Energy consumption (environmental performance indicators)

Although the COVID-19 pandemic was a major issue in 2021, research in the laboratories continued at an almost normal level. As of May 2021 onwards, full research work was allowed to resume.

The national advice to air as much as possible and open windows and doors as much as possible during the working day contributed to higher gas consumption. This is especially true since it was 3.3% colder than the long-term average over the whole year in 2021 (<https://www.climate.gov/news-features/understanding-climate/climate-change-global-temperature>). Old buildings such as NB4 are particularly sensitive to this.

Research activities at Lutjewad in Hornhuizen have increased considerably. This is clearly reflected in the electricity consumption. After being stable for many years, it has now almost doubled. But as mentioned, this is entirely work-related.

A positive step that has been made is that the new built Herdershut on Schiermonnikoog is equipped with a heat pump for heating the building. Due to the construction of the new Herdershut, electricity consumption has increased fivefold this year, but next year it will be back to its previous, stable low level.

The main part of FSE's natural gas consumption takes place in Nijenborgh 4 and the Linnaeusborg (steam humidification for the animal testing facility). The remaining part of the heat energy in FSE buildings is generated electrically by means of heat pump systems linked to heat/cold storage in the ground.

In LB heating system consists mainly of concrete core activation and underfloor heating. Concrete core activation is such a slow control that it is not switched based on time, which would result in an uncontrollable installation. The underfloor heating is also hardly ever switched on the basis of time.

In terms of air treatment, the air treatment systems are generally switched to low at night and to high again during the day, whereby the air treatment in teaching rooms is really switched off when the buildings are not open.

In NB4 the heating is generally switched on during the day and off in the evening, but this varies per building section. This is because the heating is not controlled in the same way in every building section (*via* the building management system BMS). There is also a lot of variation in the air conditioning, some systems run from Monday to Friday from 07:00 to 20:00 and then switch off, others run 24/7.

The air treatment systems and heating are only parts of the total energy consumption, as various other installations, such as chillers are operated as well. A significant part of the heat pump capacity is used for cooling. In fact, the FSE buildings that use heat pumps for cooling and heating have an annual surplus of heat because, there is more demand for cooling than for heating.

In short, turning the thermostat down a few degrees could save energy for NB4. For all the other buildings, it is much more complex.

The tables below depict the total consumption of gas and electricity for all Zernike buildings managed by FSE.

**Table S17:** FSE total gas and power consumption.

| Cumulative                        | 2017       | 2018       | 2019       | 2020       | 2021       |
|-----------------------------------|------------|------------|------------|------------|------------|
| Gas consumption (m <sup>3</sup> ) | 2 644 325  | 2 459 234  | 2 355 395  | 2 320 714  | 2 698 832  |
| Power consumption (kWh)           | 23 367 239 | 23 072 196 | 23 410 661 | 21 607 914 | 22 962 523 |

The following figures are EPI scores of power and natural gas consumptions (adjusted for floor area).

**Table S18:** FSE's energy use (gas + electricity) in EPI scores (GJ / m<sup>2</sup>).

| <b>Cumulative</b>                               | <b>2017</b> | <b>2018</b> | <b>2019</b> | <b>2020</b> | <b>2021</b> |
|-------------------------------------------------|-------------|-------------|-------------|-------------|-------------|
| <b>Gas + Gas consumption (GJ/m<sup>2</sup>)</b> | 2.48        | 2.41        | 2.29        | 2.15        | 2.35        |

| <b>Nijenborgh 4</b>                    | <b>2017</b> | <b>2018</b> | <b>2019</b> | <b>2020</b> | <b>2021</b> |
|----------------------------------------|-------------|-------------|-------------|-------------|-------------|
| Gas consumption (GJ/m <sup>2</sup> )   | 1.51        | 1.13        | 1.13        | 1.17        | 1.37        |
| Power consumption (GJ/m <sup>2</sup> ) | 1.40        | 1.49        | 1.48        | 1.42        | 1.47        |
| <b>Total</b>                           | 2.92        | 2.62        | 2.61        | 2.59        | 2.84        |

| <b>Linnaeusborg</b>                    | <b>2017</b> | <b>2018</b> | <b>2019</b> | <b>2020</b> | <b>2021</b> |
|----------------------------------------|-------------|-------------|-------------|-------------|-------------|
| Gas consumption (GJ/m <sup>2</sup> )   | 0.40        | 0.32        | 0.22        | 0.14        | 0.17        |
| Power consumption (GJ/m <sup>2</sup> ) | 2.36        | 2.54        | 2.56        | 2.29        | 2.51        |
| <b>Total</b>                           | 2.76        | 2.86        | 2.78        | 2.43        | 2.68        |

| <b>Bernoulliborg</b>                   | <b>2017</b> | <b>2018</b> | <b>2019</b> | <b>2020</b> | <b>2021</b> |
|----------------------------------------|-------------|-------------|-------------|-------------|-------------|
| Gas consumption (GJ/m <sup>2</sup> )   | 0.11        | 0.08        | 0.07        | 0.07        | 0.02        |
| Power consumption (GJ/m <sup>2</sup> ) | 0.84        | 0.92        | 1.03        | 0.93        | 0.92        |
| <b>Total</b>                           | 0.95        | 1.00        | 1.10        | 0.99        | 1.00        |

| <b>Energy Academy Europe (EAE)</b>     | <b>2017</b> | <b>2018</b> | <b>2019</b> | <b>2020</b> | <b>2020</b> |
|----------------------------------------|-------------|-------------|-------------|-------------|-------------|
| Gas consumption (GJ/m <sup>2</sup> )   | 0.00        | 0.00        | 0.00        | 0.00        | 0.00        |
| Power consumption (GJ/m <sup>2</sup> ) | 0.74        | 1.02        | 0.61        | 0.57        | 0.60        |
| <b>Total</b>                           | 0.74        | 1.02        | 0.61        | 0.57        | 0.60        |

| <b>Locatie Zernikelaan 25 (LZL25)</b>  | <b>2017</b> | <b>2018</b> | <b>2019</b> | <b>2020</b> | <b>2021</b> |
|----------------------------------------|-------------|-------------|-------------|-------------|-------------|
| Gas consumption (GJ/m <sup>2</sup> )   | -           | -           | -           | 0,15        | 0,30        |
| Power consumption (GJ/m <sup>2</sup> ) | -           | -           | -           | 0,76        | 0,22        |
| <b>Total</b>                           | -           | -           | -           | 0,91        | 0,52        |



### 2.5.1.2 Waste MPI (kg per m<sup>2</sup>)

The amount of commercial and hazardous waste is expressed in total amount of kg and in EPI (kg/m<sup>2</sup> of floor area). The cumulative scores for waste are provided below for all the buildings managed by FSE (Nijenborgh 4, Bernoulliborg, Energy Academy Europe, Locatie Zernikelaan 25 and Linnaeusborg (LB)) with a total floor area of 131 302 m<sup>2</sup>.

**Table S19:** FSE's hazardous waste production.

| Cumulative                             | 2018   | 2019   | 2020   | 2021   |
|----------------------------------------|--------|--------|--------|--------|
| Hazardous waste (kg)                   | 61 400 | 59 700 | 52 989 | 71 662 |
| Haz. waste (EPI, kg / m <sup>2</sup> ) | 0.52   | 0.50   | 0.40   | 0.55   |

**Table S20:** FSE's hazardous waste production per location.

| Location              | 2018 | 2019 | 2020   | 2021   |
|-----------------------|------|------|--------|--------|
| Hazardous waste NB4   | -    | -    | 40 990 | 55 237 |
| Hazardous waste NB7   | -    | -    | 9876   | 14701  |
| Hazardous waste LZL25 |      | -    | 2123   | 1724   |

In both NB4 and NB7, the amount of hazardous waste increased significantly. The increase for NB4 could be explained by the fact that since the beginning of 2021, the HSE department has initiated a major clean-up operation to dispose of old chemicals in anticipation of the move to a new building in 2024.

In the LB an additional floor (9th) has been renovated and opened for research activities. Conducting mostly synthetic organic chemistry experiments, the research group produces about the same or more than the organic chemical group on the eighth floor. This explains the significant increase in hazardous waste in the LB.

**Table S21:** FSE's commercial waste production.

| Cumulative                           | 2018    | 2019    | 2020    | 2021   |
|--------------------------------------|---------|---------|---------|--------|
| Commercial waste (kg)                | 144 580 | 150 584 | 110 667 | 66 522 |
| Com. waste (EPI, kg/m <sup>2</sup> ) | 1.22    | 1.27    | 0.84    | 0.51   |

**Table S22:** Commercial waste in detail.

| Cumulative                 | Amount (kg) 2020 | Amount (kg) 2021 |
|----------------------------|------------------|------------------|
| Paper                      | 38 165           | 34 629           |
| Coffee cups                | 105              | 120              |
| Electrical equipment       | 5122             | 2628             |
| Furniture                  | 3500             | 9260             |
| Mesh and bedding           | 19 080           | -                |
| Bulky industrial waste     | 13 360           | -                |
| Flammable industrial waste | 1150             | -                |
| B-wood                     | 5180             | 1320             |
| Residual waste             | 52 460           | -                |

### 2.5.1.3 Surface water emissions

FSE was granted a licence under the Surface Water Pollution Act (Wvo, <https://www.helpdeskwater.nl/secundaire-navigatie/english/waterlinks-and/>) for both the Physics and Chemistry complex and Linnaeusborg. On the basis of the duty of care specified in this licence, the faculty is required to justify the disposal of a predefined series of hazardous substances on a regular basis. The licence specifies norms for concentrations of volatile halogenated hydrocarbons (VOX compounds), volatile aromatics (BTEX compounds), extractable organic chlorine in water (EOX) and heavy metals (zinc, copper, lead, nickel and tin, as well as mercury for Nijenborgh 4).

The number of samples taken complies with the frequencies specified for the individual components in the Wvo. The table below summarizes the average concentrations at the various sample points per location over the past seven calendar years.

**Table S23:** Average concentrations measured at the Physics and Chemistry complex (Nijenborgh 4).

| Component        | VOX (µg/l)    | BTEX (µg/l)   | EOX (µg/l)    | Zn, Cu, Cr, Pb, Ni, Sn (µg/l) | Mercury (µg/l) |
|------------------|---------------|---------------|---------------|-------------------------------|----------------|
| <i>(Norm)</i>    | <i>(≤100)</i> | <i>(≤100)</i> | <i>(≤100)</i> | <i>(≤3000)</i>                | <i>(≤3)</i>    |
| Average for 2021 | <10           | 1,3           | 3,0           | 613                           | 1,0            |
| Average for 2020 | <10           | 4,7           | 3,4           | 756                           | 0,5            |
| Average for 2019 | 20            | 3,3           | 1,1           | 521                           | 0,7            |
| Average for 2018 | 6,4           | 3,0           | <100          | 456                           | 0,3            |
| Average for 2017 | 9,4           | 0,7           | <100          | 180                           | 0,2            |
| Average for 2016 | 13,8          | 4,3           | <100          | 297                           | 0,2            |
| Average for 2015 | 19,4          | 4,5           | <100          | 283                           | 0,1            |

**Table S24:** Average concentrations measured at Linnaeusborg (NB7).

| Component        | VOX (µg/l)    | BTEX (µg/l)   | Zn, Cu, Cr, Pb, Ni, Sn (µg/l) |
|------------------|---------------|---------------|-------------------------------|
| <i>(Norm)</i>    | <i>(≤100)</i> | <i>(≤100)</i> | <i>(≤3000)</i>                |
| Average for 2021 | <10           | 83            | 7062                          |
| Average for 2020 | 19            | 76            | 82718                         |
| Average for 2019 | 14            | 34            | 6933                          |
| Average for 2018 | 20            | 22            | 1982                          |
| Average for 2017 | 5             | 12            | 2267                          |
| Average for 2016 | 6             | 86            | 1849                          |
| Average for 2015 | 9             | 120           | 665                           |

All concentrations for Nijenborgh 4 are well below the norm, although the one for Mercury doubled. This is caused by a one-time high concentration of 4 µg/L in the first quarter in sample well no 2. And there was also an elevated value of 2.3 µg/L in the last quarter. The cause of this can no longer be determined. Based on European regulations, HSE repeatedly urges all scientists to use as little mercury and mercury-containing products as possible and to return unused mercury or mercury-containing chemicals as much as possible.

For the Linnaeusborg, the value of the heavy metals was dropping. There were renovations going on in the building in 2019-2020 causing the spike. The higher values were caused by copper and zinc. Chromium, lead, nickel, and tin (environmentally and health wise much more damaging metals) never exceeded the standard and were in most even below the detection limit, in terms of concentration.

The increased value for BTEX (the volatile aromatic components taken together) was caused by a one-time high value of 1200 µg/L in the first quarter in sample well 10. Immediately after this value was reported, action was taken by the HSE department by approaching the departments that discharge *via* this sample well. After all, the policy regarding liquid hazardous waste at FSE is that has to be disposed of in dedicated, labelled containers and not the *via* drain.

#### **2.5.1.4 Biological safety organization**

Many activities involving biological agents take place within the Faculty of Sciences and Engineering (FSE). Examples of these agents are pathogenic organisms, genetically modified organisms (GMO) and animal by-products. Safety and management play a major role in these activities. This is mainly to prevent exposure of employees to these agents and to ensure that used biological agents remain within the laboratories to protect humans, animals, and the environment outside the university against exposure to these agents.

The Biosafety Organization (BO) plays an important role in formulating policy on these safety issues, all based on the Dutch legislation and regulations. Besides formulating policy, the BO is also responsible for its implementation within FSE and the UG. In doing so, they manage the use of biological agents and ensure that employees carry out their work in accordance with the applicable protocols and procedures. They also provide advice and training on the formulated policies and procedures to staff and policy officials within the faculty and university.

The BO currently consists of two biological safety officers (BSO) who work closely with the biological safety coordinator within the Health, Environment and Sustainability Department (AMD) of the university. The work mainly focuses on the laws and regulations concerning the handling of genetically modified organisms and biological agents, the use of animal by-products and the access to and the fair sharing of benefits relating to the use of genetic resources (the Nagoya Protocol).

#### **Genetically modified organisms 'old permits'**

Due to a change in the law concerning the use of GMOs in 2013, all permits issued before this change (the 'old permits') must be re-evaluated to see whether the activities comply with the new legislation.

#### **Nagoya Protocol**

The Nagoya Protocol is a legislation concerning the access to genetic resources originating outside the Netherlands and the fair distribution of benefits relating to their use with the country of origin. To implement this legislation within the UG, the BO has, in cooperation with the legal department of the UG, drawn up the necessary internal guidelines, general procedures and a handbook in recent years.

In preparation of performing inventories on this legislation within FSE research groups, lots of time was spent on understanding the content of this complicated unfinished legislation. In this way, the BO can properly advise researchers within the UG and assist them better in taking the right follow-up steps to comply with the legislation. A digital assessment tool has been developed as well to enable researchers to perform assessments user-friendly and independently whether genetic sources used are in scope of this legislation.

#### **2.5.1.5 Sustainability FSE**

The faculty values the sustainability of its operations and focuses on the factors of people and the environment. During renovations, attention is paid to ergonomics, both in the lab and in the office. In addition, during renovations from a technical point of view, the most sustainable solution is always chosen, even if it is financially less favourable.

The sustainability factor is also considered during European tendering processes. Manufacturers and suppliers can score if they drive electric vehicles for example or use less packaging material or can demonstrate in some other way that they are working in an environmentally friendly way.

Employees are also regularly reminded that sustainability starts with them and that it is therefore important that fume cupboard windows are closed as much as possible when leaving the lab and that lighting and, where possible, electrical equipment are turned off. The use of an own mug is encouraged.

In addition, the Health, Safety & Environment department participates in a project of the Green Office (called "the Green Lab") with the aim to reduce the amount of waste in laboratories and to separate/recycle plastic waste.

## 2.5.2 HSE report 2022

### 2.5.2.1 Energy consumption at FSE (environmental performance indicators)

From a sustainability perspective several energy consumption measures have been undertaken. An energy-saving team was created at both UG and faculty level to try to save as much energy as possible as fast as possible. This team consists of technicians from the electrical, mechanical and water management fields, staff from Vastgoed & Beheer and staff with knowledge of the specific buildings at user-, safety- and technical level. In addition, all kinds of initiatives within institutes and research groups to save energy (and develop ideas for this) were developed. The faculty has appointed a Projectsecretaris duurzaamheid FSE who keeps track of this and who is able to bring groups together.

In order to save energy in a (reasonably) simple way in the short term, the following measures have been taken and projects started:

- Closing of FSE buildings between Friday Dec. 24th and Monday Jan. 9th.
- The comfort times in terms of heating and lighting have been adjusted and made uniform for the FSE buildings. Roughly speaking, the comfort times in the FSE buildings are between 8 am and 8 pm, during weekdays. During this period, rooms in these buildings are heated to 19°C (instead of 22°C) in winter and cooled to 26°C (instead of 21°C) in the summer.
- The (excessive) lighting in the common areas of buildings (where it was easily feasible) was also reduced to night mode during comfort times.
- All building-wide technical installations were checked for the most efficient operation possible.
- During Christmas and the New Year, most of the UG buildings were closed for two weeks plus one day during which heating and lighting were reduced to weekend mode. During this closure, users were asked to also turn off all equipment that is normally (due to having to keep it operational) on at night and on weekends.
- During the Christmas closure, all local water heaters (hot water supplies) were turned off. When they were started up, they were equipped with a time switch; outside of comfort times, the water heaters are going to be turned off. During this startup, employees were asked to be critical of need for hot water at that location.
- Employees were asked to turn off computers and peripherals as much as possible when leaving the office. Likewise, chargers etc. should be unplugged.
- Users of -80 freezers have been asked to raise the temperature to -70 C if possible.
- Users of energy-guzzling equipment have been asked to replace them with modern, more energy-efficient ones whenever possible. The FSE board is willing to assist financially with this.
- All lamps are replaced by LED-lamps during corrective maintenance.
- An initiative is underway to apply insulating foil to all windows in NB4, a poorly insulated building. Users are also asked to place reflective foil behind the radiators.
- An initiative is in progress to dispose old chemicals, old appliances and (-80) freezers and refrigerators. Disposal is at the expense of FSE in order to stimulate and motivate groups. This with the aim to reduce the number of fireproof cabinets and chemical cabinets, freezers, and refrigerators.
- An initiative is currently being developed to remove 4 large boilers in basement NB4 and provide the laboratories with local, small boilers as a hot water supply in desired areas. In fact, the 4 large boilers are kept at 70°C 24/7. A lower temperature is not possible due to expected leakage and from a legal point of view (Legionella).
- The initiative to remove all local food preparers and other household electrical equipment in offices, coffee rooms and in-between spaces in NB4 in particular was initially rolled out but withdrawn after many objections. Until the move to the Feringa Building, which has multiple pantries on all floors, this equipment will not be removed.

In all this, it should be noted that in terms of climate and air treatment of all laboratories, clean rooms and animal housing, no changes have been made to the settings and times of these installations. The safety of employees and the living conditions of animals within FSE are extremely important and therefore unaffected. No concessions are made in this area, so to speak. Certain research/equipment is also considered when determining the minimum temperature in the buildings.

Some projects are being worked out to achieve longer-term savings that require larger investments:

- A process is already ongoing for European tendering for replacement of lighting in all UG buildings for LED lighting.
- Solar panels will be installed wherever possible to generate our own electricity.
- Similarly, solar boilers will probably be installed wherever possible to generate hot water.
- After the initial relocation of the research groups in NB4, particularly from parts 17 and 18, the remaining spaces will be used in such a way that heating and air handling will be as efficient and cost-effective as possible.
- Ventilation of general areas according to demand.
- Optimizing of data storage.
- Using a measurement plan to gain insight into where, when, and how much is consumed.
- Explore alternatives to the steam plant for air treatment of the animal facility.

**Table S25:** FSE total gas and power consumption.

| Cumulative                        | 2018       | 2019       | 2020       | 2021       | 2022       |
|-----------------------------------|------------|------------|------------|------------|------------|
| Gas consumption (m <sup>3</sup> ) | 2 459 234  | 2 355 395  | 2 320 714  | 2 698 832  | 2 235 349  |
| Power consumption (kWh)           | 23 072 196 | 23 410 661 | 21 607 914 | 22 962 523 | 22 392 866 |

The next figures are EPI scores of power and natural gas consumptions (adjusted for floor area).

**Table S26:** FSE's energy use (gas + electricity) in EPI scores (GJ / m<sup>2</sup>), cumulative.

| Cumulative                                 | 2018 | 2019 | 2020 | 2021 | 2022 |
|--------------------------------------------|------|------|------|------|------|
| Gas + Gas consumption (GJ/m <sup>2</sup> ) | 2.41 | 2.29 | 2.15 | 2.35 | 2.35 |

**Table S27:** FSE's energy use (gas + electricity) in EPI scores (GJ / m<sup>2</sup>), per building:

| Nijenborgh 4                           | 2018 | 2019 | 2020 | 2021 | 2022 |
|----------------------------------------|------|------|------|------|------|
| Gas consumption (GJ/m <sup>2</sup> )   | 1.13 | 1.13 | 1.17 | 1.37 | 1.12 |
| Power consumption (GJ/m <sup>2</sup> ) | 1.49 | 1.48 | 1.42 | 1.47 | 1.44 |
| Total                                  | 2.62 | 2.61 | 2.59 | 2.84 | 2.56 |

| Linnaeusborg                           | 2018 | 2019 | 2020 | 2021 | 2022 |
|----------------------------------------|------|------|------|------|------|
| Gas consumption (GJ/m <sup>2</sup> )   | 0.32 | 0.22 | 0.14 | 0.17 | 0.16 |
| Power consumption (GJ/m <sup>2</sup> ) | 2.54 | 2.56 | 2.29 | 2.51 | 2.41 |
| Total                                  | 2.86 | 2.78 | 2.43 | 2.68 | 2.57 |

| Bernoulliborg                          | 2018 | 2019 | 2020 | 2021 | 2022 |
|----------------------------------------|------|------|------|------|------|
| Gas consumption (GJ/m <sup>2</sup> )   | 0.08 | 0.07 | 0.07 | 0.02 | 0.03 |
| Power consumption (GJ/m <sup>2</sup> ) | 0.92 | 1.03 | 0.93 | 0.92 | 0.90 |
| Total                                  | 1.00 | 1.10 | 0.99 | 1.00 | 0.93 |

| Energy Academy Europe (EAE)            | 2018 | 2019 | 2020 | 2020 | 2022 |
|----------------------------------------|------|------|------|------|------|
| Gas consumption (GJ/m <sup>2</sup> )   | 0.00 | 0.00 | 0.00 | 0.00 | 0.00 |
| Power consumption (GJ/m <sup>2</sup> ) | 1.02 | 0.61 | 0.57 | 0.60 | 0.61 |
| Total                                  | 1.02 | 0.61 | 0.57 | 0.60 | 0.61 |

| Locatie Zernikelaan 25 (LZL25)         | 2018 | 2019 | 2020 | 2021 | 2022 |
|----------------------------------------|------|------|------|------|------|
| Gas consumption (GJ/m <sup>2</sup> )   | -    | -    | 0.15 | 0.30 | 0.22 |
| Power consumption (GJ/m <sup>2</sup> ) | -    | -    | 0.76 | 0.22 | 0.28 |
| Total                                  | -    | -    | 0.91 | 0.52 | 0.50 |

### 2.5.2.2 Waste MPI (kg per m<sup>2</sup>)

The amount of hazardous waste is expressed in total amount of kg and in EPI (kg / m<sup>2</sup> of floor area). The cumulative scores for waste are provided below for all the buildings managed by FSE (Nijenborgh 4, Bernoulliborg, Energy Academy Europe, Locatie Zernikelaan 25 and Linnaeusborg) with a total floor area of 131 302 m<sup>2</sup>.

Residual waste from the UG is collected and processed by Attero. Post-separation of *e.g.* plastics and drinks cartons is conducted. Organic material is subsequently separated from the waste, which is fermented to produce Green Gas. This gas is of natural gas quality and is offered to the gas network in the Netherlands. About 225 tonnes of residual waste was delivered and about 22.5 tons of were fermented, *i.e.* 10%.

After the burning process, iron is extracted from the bottom ashes. This is burnt clean due to the cremation process and can be offered directly for recycling (4.6 tons in 2022).

During the incineration process of the remaining waste the energy generated is supplied to the neighbouring industry in the form of heat. The company also has a turbine that converts the heat (steam) into electricity. This electricity is then offered to the electricity grid.

**Table S28:** FSE's hazardous waste production in total.

| Cumulative                           | 2018  | 2019  | 2020  | 2021  | 2022   |
|--------------------------------------|-------|-------|-------|-------|--------|
| Hazardous waste (kg)                 | 61400 | 59700 | 52989 | 71662 | 108987 |
| Haz. waste (EPI, kg/m <sup>2</sup> ) | 0.52  | 0.50  | 0.40  | 0.55  | 0.83   |

**Table S29:** FSE's hazardous waste production per location.

| Location              | 2018 | 2019 | 2020  | 2021  | 2022  |
|-----------------------|------|------|-------|-------|-------|
| Hazardous waste NB4   | -    | -    | 40990 | 55237 | 82661 |
| Hazardous waste NB7   | -    | -    | 9876  | 14701 | 26272 |
| Hazardous waste LZL25 |      | -    | 2123  | 1724  | 54    |

In both NB4 and the Linnaeusborg, the amount of hazardous waste increased significantly in 2022. Since the beginning of 2021, the HSE department has initiated a major clean-up operation to dispose of old chemicals, which is still being continued up to time of writing. It started in NB4 in 2021 and in the beginning of 2022 also in Linnaeusborg (will continue until mid-2024).

### 2.5.2.3 Surface water emissions

FSE was granted a license under the Surface Water Pollution Act (Wvo) for both the Physics and Chemistry complex and Linnaeusborg. Based on the duty of care specified in this license, the faculty is required to justify the disposal of a predefined series of hazardous substances on a regular basis. The license specifies norms for concentrations of volatile halogenated hydrocarbons (VOX compounds), volatile aromatics and hydrocarbons (BTEX compounds), extractable organic chlorine in water (EOX) and heavy metals (zinc, copper, lead, nickel, and tin, as well as mercury for Nijenborgh 4).

The number of samples taken complies with the frequencies specified for the individual components in the Wvo. The table below summarizes the average concentrations at the various sample points per location over the past eight calendar years.

The so-called Environment Law ("Omgevingswet") is currently being developed by the central government. This law is likely to take effect from 1 January 2024. In this Environment Law, 26 existing laws on spatial planning, nature protection, environment, quality of life, water, building regulations and much more will be combined.

**Table S30:** Average concentrations measured at the Physics and Chemistry complex (Nijenborgh 4).

| Component        | VOX (µg/l)    | BTEX (µg/l)   | EOX (µg/l)    | Zn, Cu, Cr, Pb, Ni, Sn (µg/l) | Mercury (µg/l) |
|------------------|---------------|---------------|---------------|-------------------------------|----------------|
| <i>(Norm)</i>    | <i>(≤100)</i> | <i>(≤100)</i> | <i>(≤100)</i> | <i>(≤3000)</i>                | <i>(≤3)</i>    |
| Average for 2022 | <1            | 4,3           | 0,2           | 337                           | 0,3            |
| Average for 2021 | <10           | 1,3           | 3,0           | 613                           | 1,0            |
| Average for 2020 | <10           | 4,7           | 3,4           | 756                           | 0,5            |
| Average for 2019 | 20            | 3,3           | 1,1           | 521                           | 0,7            |
| Average for 2018 | 6,4           | 3,0           | <100          | 456                           | 0,3            |
| Average for 2017 | 9,4           | 0,7           | <100          | 180                           | 0,2            |
| Average for 2016 | 13,8          | 4,3           | <100          | 297                           | 0,2            |
| Average for 2015 | 19,4          | 4,5           | <100          | 283                           | 0,1            |

**Table S31:** Average concentrations measured at Linnaeusborg (NB7).

| Component        | VOX (µg/l)    | BTEX (µg/l)   | Zn, Cu, Cr, Pb, Ni, Sn (µg/l) |
|------------------|---------------|---------------|-------------------------------|
| <i>(Norm)</i>    | <i>(≤100)</i> | <i>(≤100)</i> | <i>(≤3000)</i>                |
| Average for 2022 | <1            | 7             | 12887                         |
| Average for 2021 | <10           | 83            | 7062                          |
| Average for 2020 | 19            | 76            | 82718                         |
| Average for 2019 | 14            | 34            | 6933                          |
| Average for 2018 | 20            | 22            | 1982                          |
| Average for 2017 | 5             | 12            | 2267                          |
| Average for 2016 | 6             | 86            | 1849                          |
| Average for 2015 | 9             | 120           | 665                           |

Due to an improvement in analytical technique, the lower limit of detection has now become 1 µg / L for VOX.

#### **2.5.2.4 Biological safety organization**

Many activities using biological agents take place within the Faculty of Sciences and Engineering (FSE). Examples of these agents are pathogenic organisms, genetically modified organisms (GMO) and animal by-products. Safety and management play a major role in these activities to prevent exposure of employees to these agents and to ensure that used biological agents remain within the laboratories to protect humans, animals, and the environment outside the university against exposure to these agents. In 2022 no biological incidents have been reported.

The AMD is coordinating the Biological Safety Organization of the UG. Together with the Biological Safety Officers (BVF's) of the FSE, the coordinator is responsible for the legal care of biological safety in the field of:

- Genetically modified organisms (GMO).
- The Nagoya Protocol.
- Biological agents.
- Animal by-products.

Full details of the activities in 2022 are accounted for by the annual report for Biological Safety; "Jaarverslag 2022, Zorgsysteem Biologische Veiligheid Rijksuniversiteit Groningen".

#### **2.5.2.5 Sustainability**

The Faculty of Science and Engineering (FSE) is developing various initiatives and workgroups on sustainability, including the labs. The Green Labs group focuses on reducing waste, energy, and water consumption in labs with the LEAF program (a user-friendly software program that helps scientists perform their lab work in a more climate-friendly manner). Early 2022, a good step was made in the European tendering process for the disposal of hazardous waste. The WIVA drums used until then for biological waste, animal by-products and human waste (ADL1) were replaced for a type made of recycled plastic.



## 2.6 FSE is going green

In June 2022 the Faculty Board of FSE launched a new sustainability program: 'FSE is going green'. Project groups were formed around ideas on sustainability. All projects will be initiated and performed in cooperation with the UG Green Office. *All images and figures in the following sections are reproduced with permission of the Faculty of Science and Engineering and Green Office, University of Groningen (Source: <https://www.ruq.nl/research/fse/sustainability-research/sustainable-research-practices?lang=en>). We acknowledge and thank E. W. Zinkstok (prev. Science Linx) for visualizing data and communication.*

### Sustainability projects at FSE:

- (1) Food and beverages at canteens and events
- (2) Buildings and energy use
- (3) Green labs initiative
- (4) Travel behavior of the staff and (ERASMUS) students
- (5) Housing of staff and room use
- (6) Green logistics at the Faculty
- (7) Grounds around the Faculty buildings
- (8) Creating sustainability awareness for staff and students
- (9) Teaching students about sustainability
- (10) Making sustainability research more visible

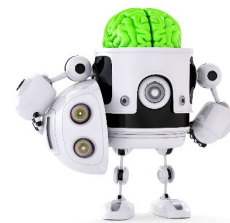

university of  
 groningen
faculty of science  
 and engineering

## FSE is Going Green

2022 overview

### 10 projects for a greener Faculty

Together, we are working on a more sustainable Faculty. Based on many ideas from within our community, 10 projects were created that address the most pressing sustainability issues. In this newsletter, we share the results from 2022 and look ahead to even more impact in 2023!

#### 2 projects are starting in February

Green logistics JOIN GROUP

Green logistics is an important aspect of managing the sustainability of our supply chain at FSE. How can we make the most sustainable design for logistics? Solutions could be: using code of conducts, collaborating with current suppliers, switching suppliers and optimizing processes.

Making sustainability research more visible JOIN GROUP

Many FSE staff contribute to a more sustainable world, and we can be proud of this contribution to society. But how can we better showcase our research and initiatives? And can we link the UN Sustainable Development Goals to our research?

**Thank you to all those involved in FSE is Going Green:**  
Steering group, Working group chairs & members, Green office team, Building management, Health, safety and environment, Faculty services, Science Linx, and all other change-makers!

#### 4 projects started in 2022

- Food and beverages
- Buildings and energy use
- Green labs FSE JOIN GROUP
- Travel behaviour of staff

#### 4 projects will start later this year

- Housing of staff and room use
- Grounds around the faculty buildings
- Sustainability awareness and visibility
- Teaching students about sustainability

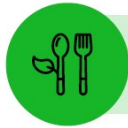

## Food and beverages at canteens and events

Project 1

### Aim

To increase the variety and quality of plant-based and vegetarian food at the canteens and for catering, and to reduce food waste

### Impact in 2022

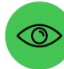

Created more awareness for sustainable food through visibility of project and survey

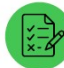

Conducted a survey amongst FSE staff and students. 578 respondents

### How to help the change

- ▶ By choosing plant-based and vegetarian options in canteens and for catering, you directly support the change by creating a higher demand
- ▶ Bringing your own coffee mug reduces wasting disposable cups (these are difficult to recycle). You get a 10% discount at canteens and the Zernike food court when you buy coffee or tea using your own mug

### Why

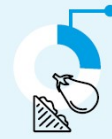

Food production causes **26%** of anthropogenic greenhouse gas emissions\*

Switching to a plant-based diet can be beneficial for human health, planetary restoration and reducing greenhouse gas emissions

### Plans for 2023

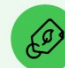

Pilot to make Bernoulliborg canteen more sustainable, where changes are tested such as: improved labeling, reusable cutlery, more local/seasonal products and more plant-based and vegetarian alternatives

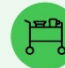

Promoting and improving plant-based catering for FSE events, possibly making plant-based/vegetarian catering default (FSE signed a letter from the Green Office for UG-wide vegetarian catering)

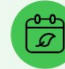

Pilot for a food waste calendar for students, where leftover food from canteens can be picked up and is not wasted

*These plans need to be discussed and coordinated with Beijl, the company that takes care of the canteens and catering*

1. Poore, J. & Nemecek, T. (2018). Reducing food's environmental impacts through producers and consumers. Science 360 (6392): 987-992.

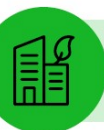

## Buildings and energy use

Project 2

### Aim

To reduce our energy use by 30% in the coming 3 years

### Impact in 2022\*

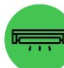

Lights were permanently put on night setting in Nijenborgh 4

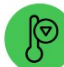

Thermostats were lowered throughout FSE buildings

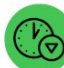

Comfort hours (when heating is on) reduced throughout FSE buildings

\* part of these impacts were initiated by the Energy task force

### How to help the change

- ▶ Help insulate Nijenborgh 4: research groups can organize team insulation sessions. Or insulate your own lab and/or office with the available packages (including window insulation film and radiator foil).

[MORE INFORMATION](#)

### Why

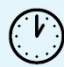

The current electricity usage at FSE in 1 hour is equivalent to the usage

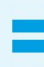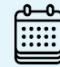

of 1 average Dutch family in a whole year

### Plans for 2023

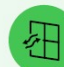

Insulation measures in Nijenborgh 4: installing window insulation film (and other measures) to reduce heat loss. This will reduce gas consumption with a minimum of 91.000 m<sup>3</sup> per year (=equivalent of >77 families)

[VIEW UKRANT VIDEO](#)

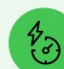

Further reduce energy and gas consumption through:

- Targeted energy measurements
- Replacing inefficient equipment
- Installing local electric boilers
- More lights on night setting & UG-wide plan to replace all lights with LED

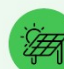

Solar panels will be installed on roofs of FSE buildings where possible (and where they are not yet present)

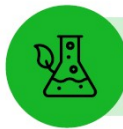

JOIN GROUP

## Green Labs & LEAF

Project 3

### Aim

To reduce (plastic) waste, water and energy use in our labs

### Impact in 2022

- The pilot of the LEAF (Laboratory Efficiency Assessment Framework) project has resulted in:
  - 4 labs received bronze LEAF award (3x Stratingh, 1x GELIFES)
  - 2 labs received silver LEAF award (2x Stratingh)
  - 11 labs are busy with accreditation and more have requested to start
- 41 ULT freezers were turned up to -70°C (from -80°C), saving the same energy as >13 households per year
- Green lab guide book was created and distributed
- Community meetings were held to discuss sustainability in labs

### Why

Labs use 10x more electricity and 4x more water than office spaces of the same size<sup>1</sup>

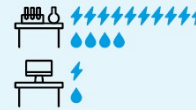

Labs also produce 5.5 million tonnes of plastic waste worldwide per year<sup>2</sup>

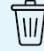

### Plans for 2023

- Defrosting and cleaning ULT freezers and continuing efforts to turn up more freezers to -70°C
- All FSE labs participate in the LEAF project to make labs more sustainable
- Organizing regular community meetings & spreading green lab guides widely
- Pipette tip washing project: reducing the amount of plastic waste by switching to reusable pipette tips (starting with pilot project for students only)

### How to help the change

- Join a community meeting! Here we discuss the LEAF project and how you can join, and share other sustainable guidance. The next meeting is on Feb 21st from 16:00. [SIGN UP FOR THE MEETING](#)
- Join our working group. We have had great success in 2022 thanks to some very enthusiastic change-makers, but we need your help to keep the momentum going. We also need LEAF coordinators who can help roll out this project. [JOIN GROUP](#)
- Plan a day to defrost and clean your ULT freezers, and use our green lab guidebook to make other sustainable changes in your lab. [DOWNLOAD GREEN LAB GUIDE](#)

1. Kaye, C. (2020). Media Briefings 2020. #3 Efficiency & Sustainability: Igniting Innovation. <https://www.agilent.com/content/dam/about/newsroom/media-room/igniting-innovation/Efficiency-Sustainability-Igniting-Innovation-Media-Briefing.pdf>  
 2. Urbina, M., Watts, A. & Reardon, E. (2015). Labs should cut plastic waste too. Nature, 528 (479). <https://doi.org/10.1038/528479c>

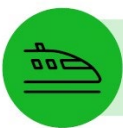

## Travel behaviour of staff

Project 4

### Aim

To reduce CO<sub>2</sub> emissions from air travel with 30% by 2026, in line with the sustainability roadmap of the University of Groningen

### Impact in 2022

- Conducted survey among FSE staff about (air) travel behaviour: 362 respondents filled in the survey - results are expected in February

### Why

16% of the total CO<sub>2</sub> footprint of the UG is caused by business trips, mostly by plane

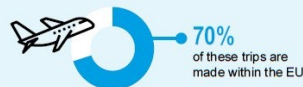

### Plans for 2023

- Analyzing, publishing and presenting the survey results in a report
- Giving advice to the Faculty on which measures would be best suited for FSE to reduce CO<sub>2</sub> emissions from air travel

### How to help the change

- Traveling abroad for work? Take the train as much as possible. As of 2023, it is UG policy to travel by train for journeys up to 9 hours. [READ MORE ABOUT THE NEW POLICY](#)
- Consider attending meetings remotely. Especially for short and targeted meetings, online should become the default. The faculty has good video conference facilities. [FIND ROOMS WITH ONLINE MEETING FACILITIES](#)

### 2.6.1 Feringa Building

The old laboratory complex (Nijenborgh 4, constructed in 1969) for research and education in chemistry, physics and engineering was technically outdated and did not align with modern environmental and energy standards. After thorough investigation (renovations vs. new building), the University of Groningen decided to build the Feringa Building to replace Nijenborgh 4. The building will include the education and research in chemistry, physics, astronomy, and engineering, covering the following institutes:

- Stratingh Institute for Chemistry
- Engineering and Technology Institute Groningen (ENTEG)
- Zernike Institute for Advanced Materials (ZIAM)
- Groningen Biomolecular Sciences and Biotechnology Institute (GBB)
- Van Swinderen Institute for Particle Physics and Gravity
- Kapteyn Astronomical Institute
- SRON Netherlands Institute for Space Research

The Feringa opened on March 1st, 2024, and includes:

- 64 000 m<sup>2</sup> gross floor area
- Size: 260 m long, 63 m wide
- Five stories high, with an extra floor for installations
- Space for 1400 students and 850 staff members
- A large lecture hall with 420 seats, can be divided in 180 and 240 seats
- Restaurant with 250 seats
- 3 km of lab tables and 450 fume hoods
- Clean rooms, low vibration laboratories and 30 laser labs
- Air volume flow of 900 000 m<sup>3</sup>/h

#### **Sustainability aspects:**

All the laboratories are built on the north side of each wing, keeping the impact of sunlight to a minimum. The chemical, biochemical and physics laboratories are flexible and interchangeable as each one can be connected separately to the ventilation, power, and gas supply networks.

- Optimal insulation
- Heat reflective coating (HR) glass, better insulation than standard double glazing glass
- 900 m<sup>2</sup> solar panels ( $\pm$  120 000 W<sub>p</sub> (watt-peak) of nominal power)
- LED lights in addition to natural daylight
- Gasless heating
- Geothermal heating and cooling system ('WKO') with heat pumps
- Energy saving auto close fume hoods
- 4 courtyards for biodiversity



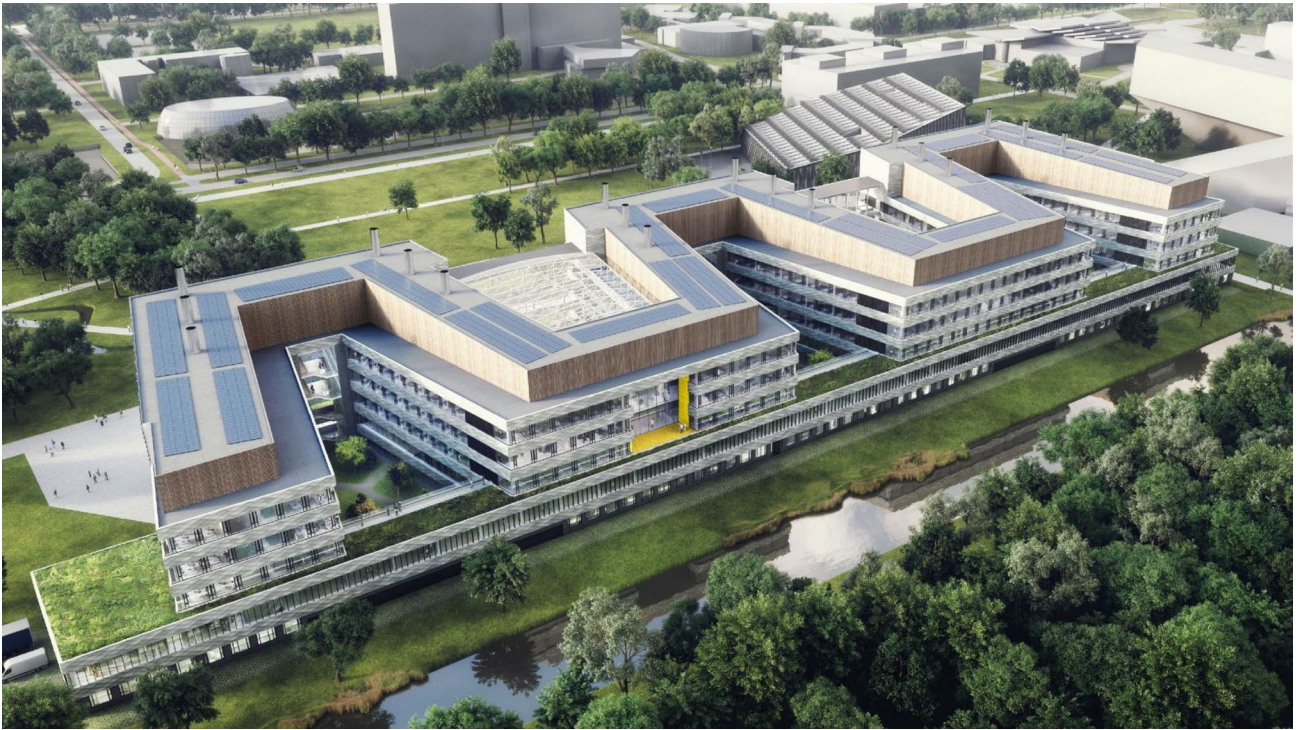

## Patios

4 courtyards:

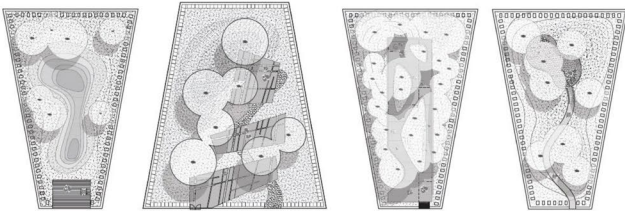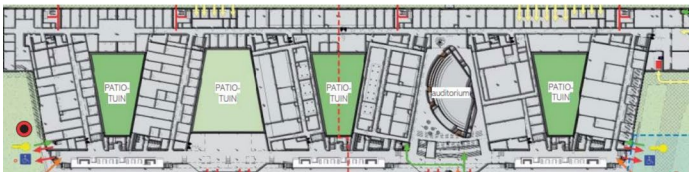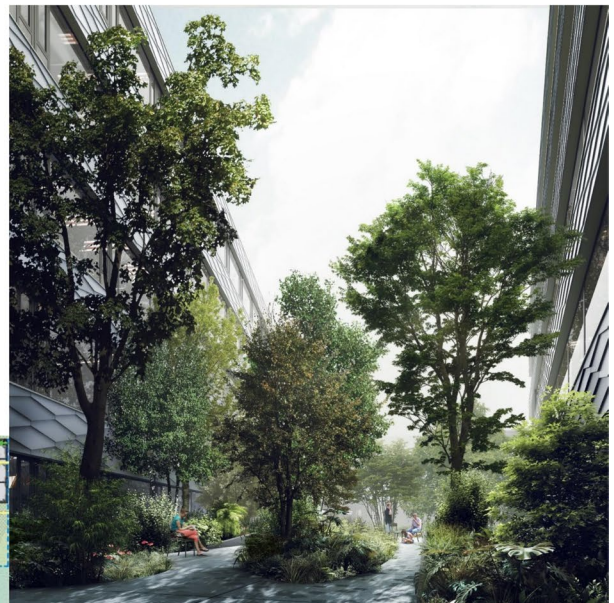

**Figure S10:** Design of the Feringa Building (top) including the 4 courtyards to enhance biodiversity (bottom) and solar panels (900 m<sup>2</sup>), HR glass, heat pumps, automated closing fume hoods, LED and natural light.

## 2.6.2 Travel behavior of staff at the Faculty of Science and Engineering

The following sections are reproduced or adapted and were calculated through F.F.S. van der Tak and are published with permission of the Faculty of Science and Engineering, University of Groningen.

### 'FSE is going green: travel behavior of the staff'

The results of the survey held by the 'FSE is going green' working group 'Travel behavior of the staff', are depicted below.

The University of Groningen aims to reduce CO<sub>2</sub> emissions from air travel by 30% by 2026 (compared to 2019). To achieve this goal, UG-wide measures regarding work-related travel behavior will be implemented. In this light, the recommendations in the report are valuable and the Faculty Board has therefore submitted them to the Green Office, which is taking the lead in developing university-wide measures.

In its survey, the 'Travel behavior' working group proposes four measures, two of which are stimulating measures (monitoring CO<sub>2</sub> emissions and a climate contribution for air travel) and two are more restrictive measures (a CO<sub>2</sub> budget and a mandatory reduction). The Board does not rule out the possibility that more restrictive measures will be necessary in the long term, in order to achieve the intended reduction in CO<sub>2</sub> emissions.

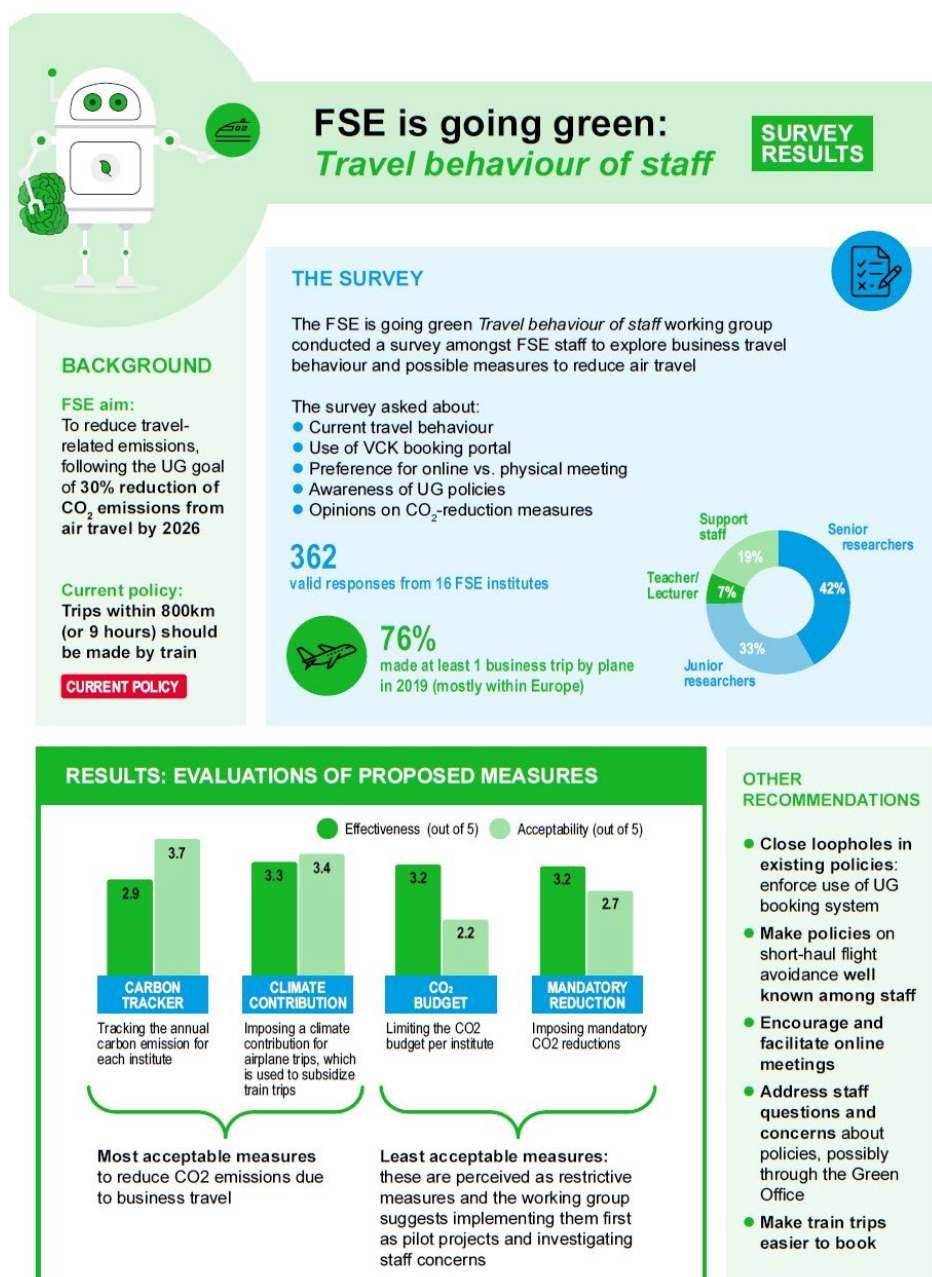



### **2.6.1.1 Summary**

In a survey among FSE staff, two policies to reduce CO<sub>2</sub> emission due to business travel were found to be the most acceptable: tracking the annual carbon emission for each institute, and imposing a climate contribution for airplane trips, which is used to subsidize train trips. We recommend implementing these policies after working out their practical details. In contrast, imposing mandatory CO<sub>2</sub> reductions and limiting the CO<sub>2</sub> budget per institute are perceived as restrictive measures, which we suggest implementing only as pilot projects, after investigating staff concerns. In addition to introducing new policies, we recommend closing loopholes in existing policies, making current and planned policies on short-haul flight avoidance well known among staff, to encourage and facilitate online meetings, to address staff questions and concerns about policies, and to make the booking of international train trips easier.

### **2.6.1.2 Context and scope**

In Spring 2022, the Faculty board started the FSE is Going Green program,<sup>4</sup> which aims to make FSE operations more environmentally sustainable by limiting resource use, waste production, and greenhouse gas emission. The working group Travel behavior of the staff has looked specifically into ways to reduce greenhouse gas emissions due to business travel, in particular by airplane. The target reduction is 30% by 2026, in line with the UG sustainability goals.<sup>5</sup> The working group did not consider commuting and trips within the Netherlands, as these were found to be minor sources of CO<sub>2</sub> in a 2020 Arcadis study of the nine NWO institutes, and a 2021 study of astronomy research in the Netherlands.<sup>6</sup> The UG policy on parking permits addresses pollution by commuting.

### **2.6.1.3 Approach**

Since 2019, policy at UG has been that trips within 500 km (or 6 hours train travel time) from Groningen cannot be taken by airplane; as of 2023, this radius is extended<sup>1</sup> to 800 km (or 9 hours).<sup>7</sup> In November 2022, we conducted a survey among all 2889 staff employed by FSE institutes, asking about travel behavior, use of travel agency portal, online vs. physical meetings, awareness about UG mobility policies, and their opinions on additional measures for reducing CO<sub>2</sub> emissions connected with UG travels. An open box was added at the end of the survey to collect staff members' comments and suggestions about the topic. The target group includes junior (45%) and senior (11%) scientific staff, teaching staff (5%), support staff (23%), and researchers on temporary contracts such as PhD students and postdocs (16%). Undergraduate students were not part of the survey, since FSE has no legal means to influence their travel behavior. See Appendix A for the full text of the questionnaire. We received 362 valid responses (13%) from 16 institutes and offices across FSE. The full results of the survey are in Appendix B, and the main findings are summarized below.

---

<sup>1</sup> *Implemented after the survey was conducted*

### 2.6.1.4 Results on preferred policies

We presented respondents with four additional measures:

1. Launch a carbon tracker showing how much CO<sub>2</sub> each institute emits by traveling.
2. Introduce a small (*e.g.* 5%) climate contribution for airplane trips, which is used to sponsor train trips through first class tickets, frequent traveler cards, etc.
3. Impose mandatory emission reduction targets for flights on all institutes (scaled with institute size).
4. Give each department a limited CO<sub>2</sub> budget for traveling (scaled with institute size).

We asked participants to indicate how effective (*i.e.*, in reducing the CO<sub>2</sub> emission caused by staff members' flying behavior) and acceptable (*i.e.*, with minimal impact on their work) they found each measure. The table and figure below report these scores on a 5-point scale.

|                        | EFFECTIVENESS |        | ACCEPTABILITY |        |
|------------------------|---------------|--------|---------------|--------|
|                        | Mean          | Median | Mean          | Median |
| Carbon tracker         | 3.0           | 3      | 3.7           | 4      |
| Climate contribution   | 3.3           | 3      | 3.4           | 4      |
| CO <sub>2</sub> budget | 3.2           | 3      | 2.2           | 2      |
| Mandatory reduction    | 3.2           | 3      | 2.7           | 3      |

**Respondents' evaluation for the proposed measures (means)**

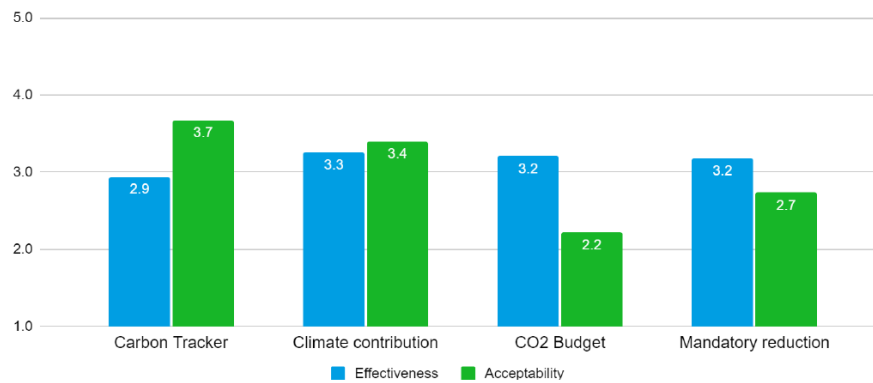

<sup>2</sup> Responses with at least the first question related to UG mobility completed are considered valid.

**Figure S11:** Respondents' evaluation of proposed travel policies and measures.



### 2.6.1.5 Other results

**Travel behavior:** Among the staff members who indicated traveling in 2019, the majority (65%) took 1 to 5 flights. Senior researchers clearly travel the most. The most chosen destination was Europe (131 flights out of 196). Some institutes fly much more than others.

**Portal use:** Booking trips via VCK (UG travel agent) is done always by 24%, usually by 34%, sometimes by 21%, and never by 21% of respondents. The latter number is surprisingly high, and is especially high (41%) among support staff. This is unexpected since FSSC is supposed to refuse reimbursement of trips which are booked outside the portal.

**Policy awareness:** The large majority of respondents were aware of the UG mobility policy implemented in 2019 (78%) and supported it to some extent (84%). When asked about the 2023 update of the policy, about half of them were informed about it (47%) and indicated supporting it to some extent (63%). Few people indicated being strongly against these two policies (3% and 9% for the old and new updated policy respectively).

**Meeting preference:** Attending meetings online works in most or all cases for 18%, in ~half the cases for 43%, and in some or no cases for 40% of respondents. The type of meeting is likely to play a role, as small targeted (business / committee) meetings may be more suitable for an online setting than larger open-ended meetings such as brainstorming and conferences.

**Further suggestions:** Finally, the respondents came with questions and suggestions of their own. The most common remarks were: trains are often delayed or crowded; policies need to be fair toward staff with special needs; some airplane travel will always be needed. A common question is how exactly travel times and distances are calculated.

### 2.6.1.6 Discussion

**Policy acceptance:** For all four proposed measures, the differences in acceptability between institutes are small, suggesting that the variation in acceptability between measures is real. Push measures (*i.e.*, taxes or restrictions) are often perceived as less acceptable than pull measures (e.g., discounts), but they usually are more effective. Research suggests using combinations of both measures. In addition, taxes and monetary contributions are perceived to be more effective and acceptable when revenues are allocated within the same domain (e.g., climate contribution for flying going to subsidize train travel).<sup>10,11,12</sup> We suggest implementing first the two policies that were considered to be more acceptable (*i.e.*, carbon tracker and climate contribution). We then suggest investigating in more depth the less acceptable policies (e.g., CO<sub>2</sub> budget and mandatory reduction), and targeting the concerns that emerge (e.g., previous research suggests that perceived unfairness might play a substantial role).<sup>12</sup> In addition, implementing the more restrictive policies as pilots might be a solution, as the acceptability of a policy tends to increase after its implementation.<sup>13</sup>

**Perceived effectiveness:** The four proposed measures are seen by FSE staff as about equally effective (see Table above) to reduce CO<sub>2</sub> emissions. This is surprising as differing trends between effectiveness and acceptability may be expected. It may be that staff members have difficulty separating effectiveness and acceptability. The perceived effectiveness of the four measures varies considerably between institutes, which may indicate differences in travel culture. Alternatively, this variation may again indicate respondents' uncertainty as to what measures would be effective. Literature indeed suggests that people are not accurate when estimating the effectiveness of such policies.<sup>10</sup> For example, pricing is known to affect air travel substantially.<sup>8</sup>

### 2.6.1.7 Caveats

**Demographics:** The distribution of respondents over staff types mostly follows the intrinsic distribution, except that senior researchers are overrepresented and junior researchers (PhDs and Postdocs) underrepresented. The response fraction varies considerably between institutes, possibly because of the way that the questionnaire was distributed (*via* the institute directors). Future follow-up surveys may use stratified sampling to be representative of all career stages and scientific disciplines across FSE.

**Sample size:** The total number of respondents is high enough to draw conclusions for FSE as a whole.<sup>14</sup> Only a few institutes have enough responses for meaningful subsamples,<sup>15</sup> so we interpret our survey results only in aggregate. Due to the way that the survey was introduced, the sample is of a convenience nature, rather than strictly controlled, but we nevertheless consider it useful for our purpose.

**Potential bias:** The responses to our survey may be biased because climate-minded staff are more likely to respond. Such bias is especially likely for the question about post pandemic travel behavior, where 65% claim to have flown less in 2022 than in 2019, and 85% of these claim that sustainability is a reason for this change. Adding a lottery (the chance of winning a small prize) may help against this bias in future surveys.

### 2.6.1.8 Recommendations and further steps

Two policies are likely to meet with broad acceptance among FSE staff: tracking the annual carbon emission for each institute, and imposing a small climate contribution for airplane trips, which is used to sponsor train trips. More restrictive policies, such as limiting the CO<sub>2</sub> budget of each institute and imposing mandatory reductions in CO<sub>2</sub> emission, may meet with some resistance, and should only be implemented as pilot projects or after studying the concerns of FSE staff.

Before the new policies can be implemented, they need to be worked out further. In particular, the carbon tracker could use the open-source tool developed in,<sup>9</sup> but it must be clarified where the tool gets its input data. For the contribution measure, the questionnaire suggested a 5% surcharge, but the final number may be different. The contribution could be charged through the UG travel portal, but it needs to be worked out how the funds would be redistributed.

Besides considering new policies, we recommend the following steps:

**1. Close loopholes in existing policies.** In exceptional cases, requests for bookings using a travel agency other than the internal UG agency may be granted, but ~20% of staff never using the portal is clearly too much. The high acceptance rate of the old and new UG travel policies suggests that this behavior is due to a lack of awareness, rather than a sign of resistance. We do, however, note that booking train trips via VCK, especially across multiple countries, is not always straightforward.

**2. Make policies well known.** A significant fraction (~55%) of FSE staff was unaware of the upcoming travel policy one month before its implementation, and ~20% unaware even of the one introduced in 2019. Through newsletters and messages to new staff, travel regulations should be announced more prominently. The UG travel portal can help reminding too.

**3. Encourage and facilitate online meetings where possible.** Short and/or targeted events such as thesis defenses, colloquia/seminars, and business/committee meetings should become online/hybrid as much as possible. Part of this policy may be establishing an online etiquette (turning cameras on, identifying with full name, etc.). Rooms with video equipment should be available to all staff.

**4. Address questions and concerns about policies.** The responses suggest that most FSE staff are willing to adopt a pro-train policy, but that they have questions about its practical implementation. For broad acceptance of policies it is important that these concerns are properly addressed.

**5. Make train trips easy to book from the UG portal.** Staff would be much more willing to travel by train if the booking process were smooth and convenient. This should be a requirement for the 2023 version of the UG travel portal.

## 2.6.1.9 Appendix: Full results of the survey

### Demographics

The majority of respondents are from Bernoulli (17%) and ENTEG (14%). Respondents indicating 'others' are from FTD, Science Linx, SSE/ENTEG; 9 of them did not indicate their institute (Fig 1). The majority of respondents are Senior researchers and Junior researchers, i.e., PhDs and Post-docs (Fig 2).

Figure 1.

#### Institutes

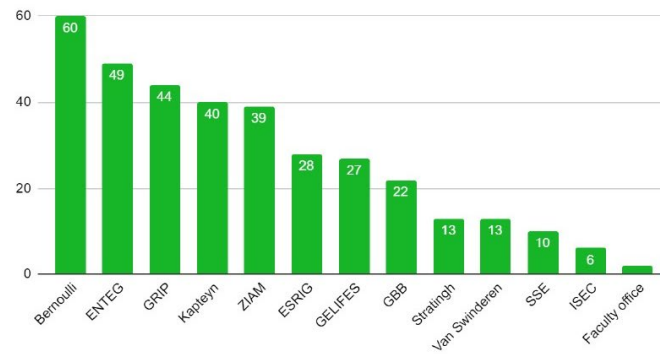

\*N=362

Figure 2.

#### Role

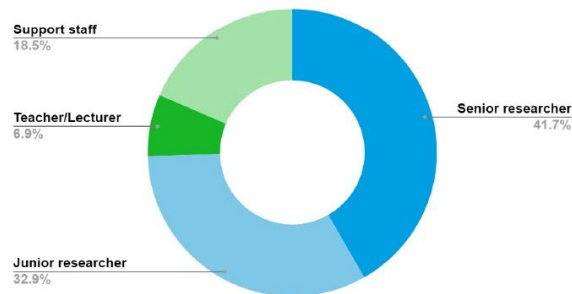

\*N=362

### Proposed measures

Participants were asked to indicate on a 5-point scale <sup>6</sup> how effective (i.e., in reducing the CO<sub>2</sub> emission caused by staff members' flying behavior) and acceptable (i.e., with minimal impact on their work) they found each measure. Respondents evaluate the effectiveness of each policy to a similar extent. The carbon tracker was evaluated as most acceptable, followed by the climate contribution and the mandatory reduction. The least acceptable measure was the CO<sub>2</sub> budget.

Figure 3.

#### Respondents' evaluation for the proposed measures (means)

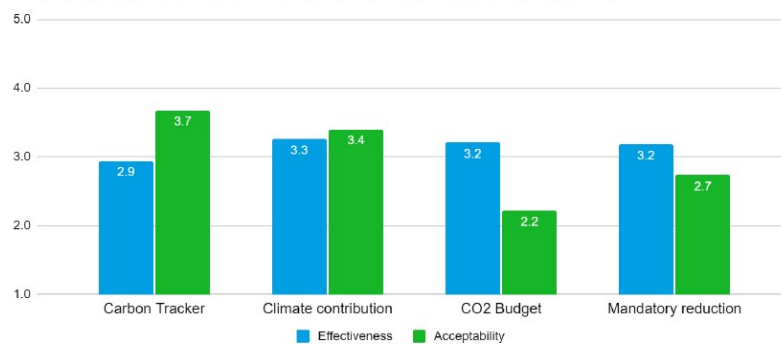

\*N=362

### Business trips by plane in 2019

Ca. half of respondents indicated traveling in 2019 for business trips. The majority (65%) took between 1 to 5 flights in 2019 (Fig 4). The most chosen destination was Europe: 131 flights (Fig 5).

Figure 4.

#### Business trips by plane in 2019

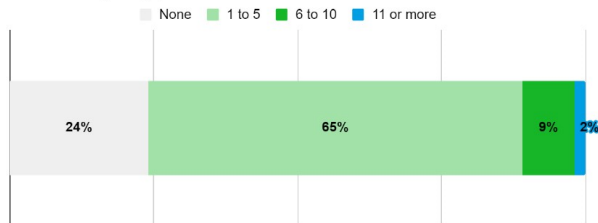

\*N=202

Figure 5.

#### Flight destinations

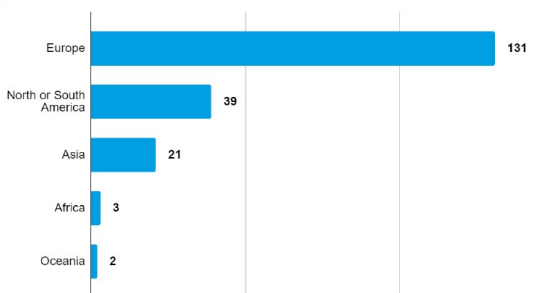

\*N=133

### VCK use

Only 23% of respondents use VCK to book travels outside the Netherlands. 22% reported never using it (Fig. 6) and this number doubles when considering support staff (42%). The use of VCK is perceived as quite positive, but not particularly fast and quite difficult (Fig 7).

Figure 6.

#### Booking trips via VCK

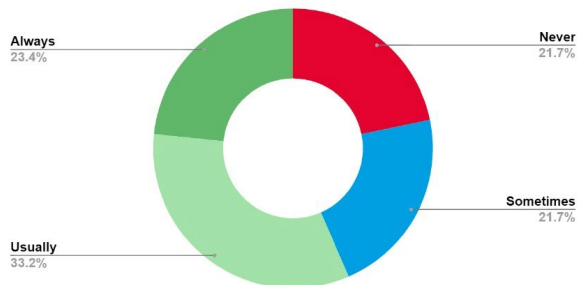

\*N=184

Figure 7.

#### Experience with VCK Travel

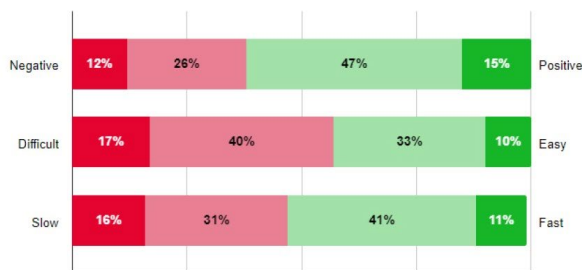

\*N=184

### Support for mobility policies

The large majority of respondents were aware of the UG mobility policy implemented in 2019 (78%) and the new mobility policy becoming effective in January 2023 (63%).

Figure 8.

#### Awareness Old Mobility Policy

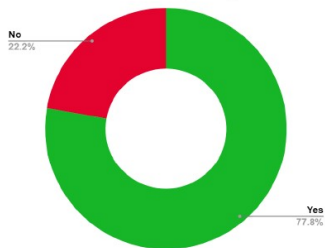

#### Awareness New Mobility Policy

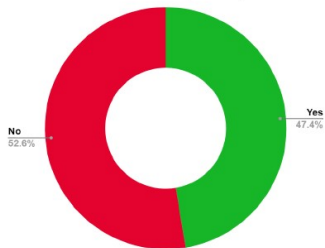

\*N=342

Participants were asked on a 7-point scale to indicate the extent to which they were in favor or against the two policies. The large majority of respondents were aware of the UG mobility policy implemented in 2019 (78%) and supported it to some extent (84%). When asked about the new updated version of the policy (900 km/8 h), about half of them were informed about it (47%) and indicated supporting it to some extent (63%).

Figure 9.

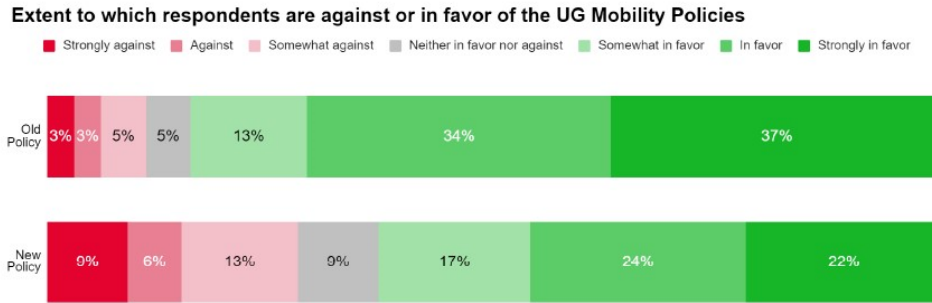

## Meeting preferences

When asked about meeting preferences, 40% of respondents stated that online attendance is an acceptable alternative to in-person attendance about half of the time.

Figure 10.

### Online meetings as an alternative

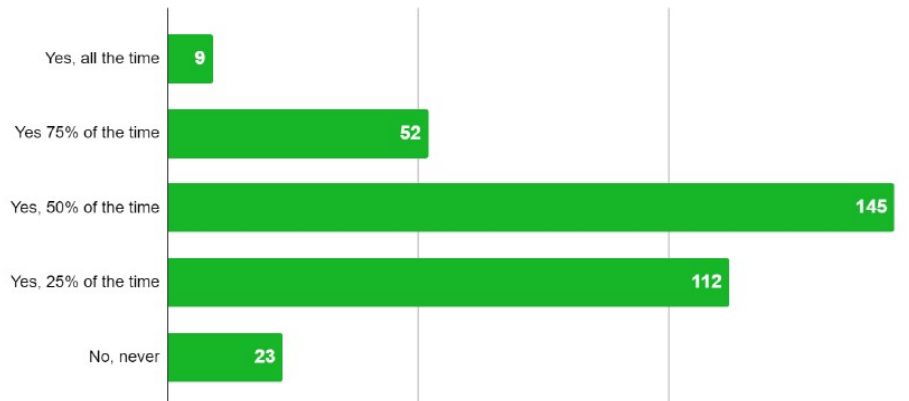

\*N=341

### 2.6.3 Food and canteens

In light of the 'FSE is going green' program the 'Food, beverages and canteens working group' initiated a pilot for a more sustainable canteen. In collaboration with Contract Management (US), Beijc Catering and the UG Green Office a plan was made and survey conducted to improve sustainability of canteens at FSE. *We hereby acknowledge all efforts and support of I. Maltagliati to enhance progress towards sustainable catering.*

#### Context

There has been a survey within the FSE (staff and students, 578 valid respondents), launched by the food working group and the Green Office. This survey showed that sustainability and food variety were points to improve. It also showed that policies towards more plant-based food are supported by most respondents. *See appendix A for the main results.*

#### Opinions on canteens:

food variety and sustainability scored low: respectively 77% and 64% of the respondents think these aspects should be improved.

#### Willingness to pay more for:

warm meals (on average 21% more), healthy options (17% more), sustainable options (16% more).

#### Policy acceptance:

64% of responders think that plant-based food should be a default during events.

#### Policy acceptance:

66% of responders agree that there should be one day with only plant-based food per week in the university canteens.

#### Policy acceptance:

80% of respondents agree that 50% of food served in the university canteens should be plant-based.

75% of responders were not aware that there is a 10% discount on warm beverages for bringing your own mug.

### Canteen offer (Dec 2022)

Additional notes:

- Not all canteens have information on salad ingredients (e.g., Harmonie)
- The cooks do not always know the ingredients

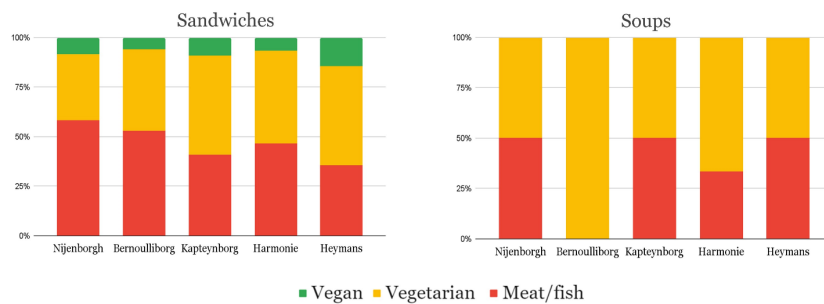

### Canteen use

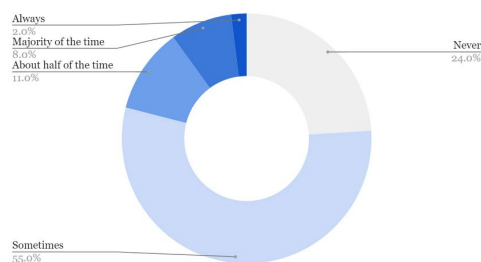

N= 578

**Top 3 reasons for buying:**  
(frequent users)

- Convenient location (48%)
- Good food quality (16%)
- Affordable prices (10%)

**Top 3 reasons for NOT buying:**  
(non-frequent users)

- High prices (28%)
- I am used to bring my lunch (21%)
- Low variety (15%)

Figure S12: Survey responses on canteen offer and canteen use.

### Opinions on the canteen

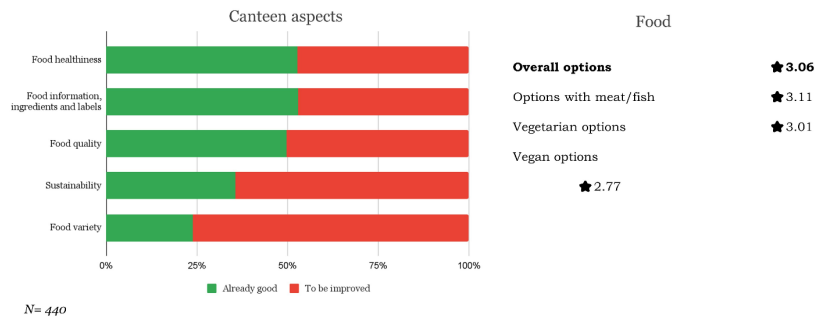

### Policy acceptance

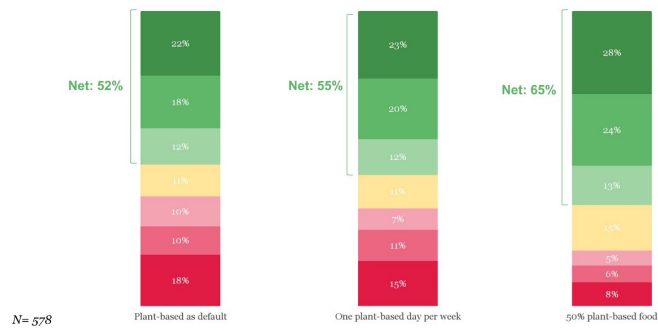

### Awareness

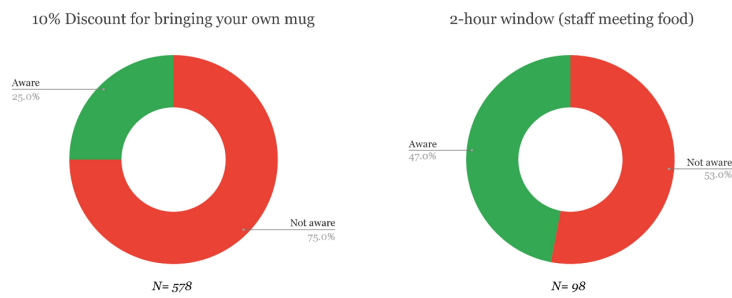

Figure S13: Survey results on opinions on the canteens, policy acceptance and awareness.



## Bernoulli Bistro

With the results of the survey the working group was able to establish sustainable new canteen at the Zernike Campus of UG, which covers the whole FSE: Ther Bernoulli Bistro launched in 2023 offers 100% vegetarian fresh food which is bought locally. The canteen operates with reusable tableware explicitly, and packaging is non-plastic thus recyclable.

**Welcome to Bernoulli's Bistro**  
TOWARDS SUSTAINABLE, HEALTHY & TASTY FOOD

Bernoulli's Bistro is a pilot in the Bernoulliborg canteen; a first step towards offering more sustainable, healthier and tastier food. The pilot is part of the FSE is Going Green programme - and also serves as a 'test kitchen' for improving canteens across the University.

### Changes

- 100% vegetarian**  
Our food is 100% vegetarian - and at least 50% plant-based. Plant-rich diets are an effective way to reduce planetary impacts and as a University we can play a leading role in this transition. A recent comprehensive analysis in the UK shows that a plant-based diet results in 75% less greenhouse gas emissions, water pollution and land use than meat-rich diets.<sup>1</sup>
- Fresh & healthier food**  
There is strong evidence that plant-rich diets have a beneficial effect on health.<sup>2</sup> However, plant-rich food can still be unhealthy. We aim to offer healthy and tasty food that is made from fresh ingredients, locally sourced where possible. We also offer a greater variety of foods, including warm meals.
- Reusable tableware**  
Single-use tableware has a higher environmental impact when compared to reusable options, even when recycling is taken into account.<sup>3</sup> We are introducing reusable tableware, while taking steps towards making the washing process more sustainable.
- Packaging & other changes**  
Where possible, packaging will be reduced or more sustainable options tested. We will also focus on reducing food waste. We will also focus on signs around the canteen to see what new changes are implemented.
- Future-proofing canteens**  
Sustainability is a core value of the University. In the *Roadmap to Sustainability*<sup>4</sup>, the University of Groningen aims to make 60% to 95% of food offered in canteens vegetarian or plant-based. With *Bernoulli's Bistro*, we create a 'test kitchen' for future-proofing all canteens at the University.

**Dishwashing station**  
Please take tableware to the designated dishwashing area after use. If you have taken tableware to your office, the items can be returned to the dishwashing area at all times.

**What do you think?**  
  
<https://www.bernoullibistro.nl>

**Organised by:**

- FSE is Going Green (Food & beverages working group)
- UG Green Office
- Beijk
- Facility Services
- Muzzica

university of groningen  
Faculty of science and engineering

Figure S14: Bernoulli Bistro for sustainable food and canteens.



## 2.6.4 Biodiversity

The project Grounds around the Faculty Building (henceforth abbreviated as GAF) is one of the 10 working groups of FSE is Going Green, a program focusing on improving sustainability at the UG. An important partner for GAF is the Green Office, which coordinates projects university-wide and the Terrain Management department, which is responsible for ground maintenance. The working group focuses on the Grounds around the Faculty Buildings at Zernike. There is also a publication covering the sustainable and nature-driven design of the Zernike Campus of the University of Groningen.<sup>21</sup>

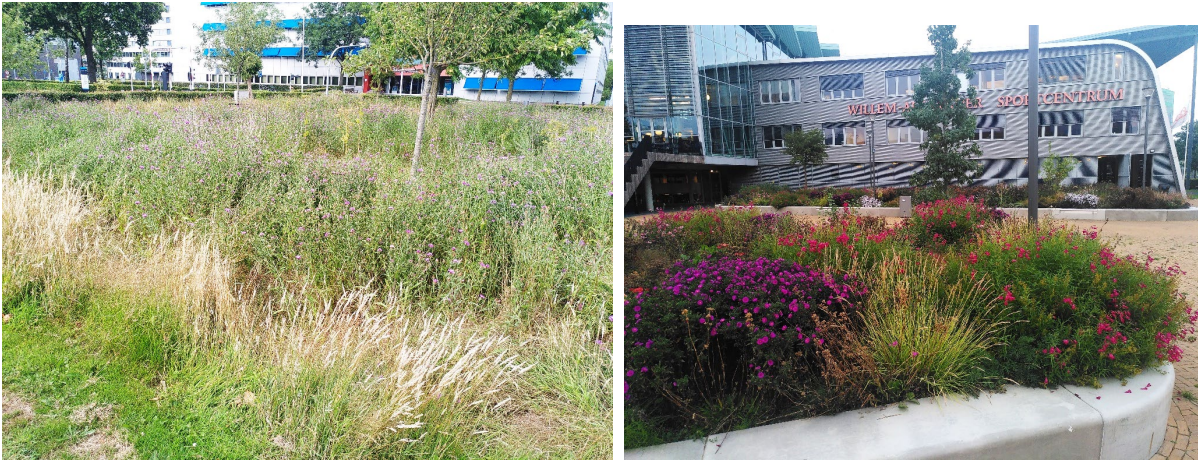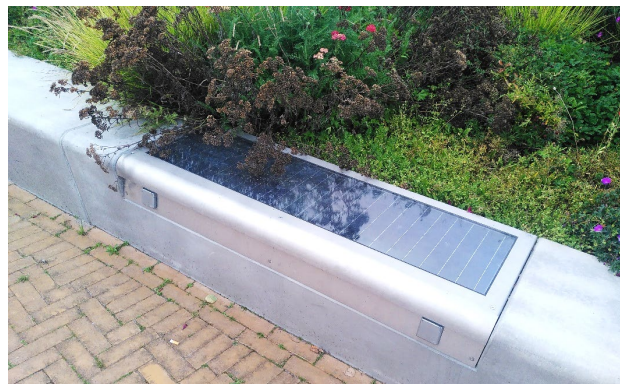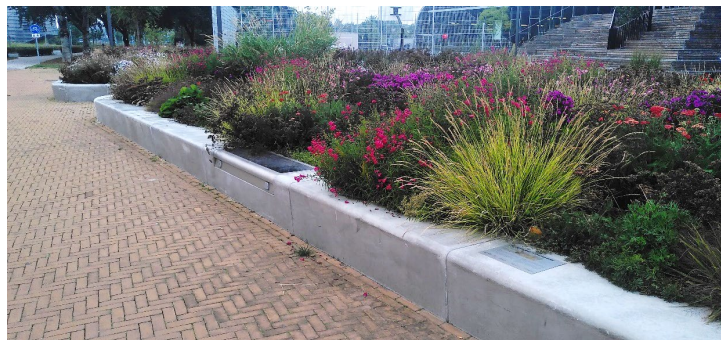

**Figure S15:** Free flower and grass areas for insects and bees (top left). Smart watering areas, which are solar fueled to pump water to the dry soil to keep the plants alive depending on temperature and humidity (top right and bottom).

## 2.7 Green Labs RUG

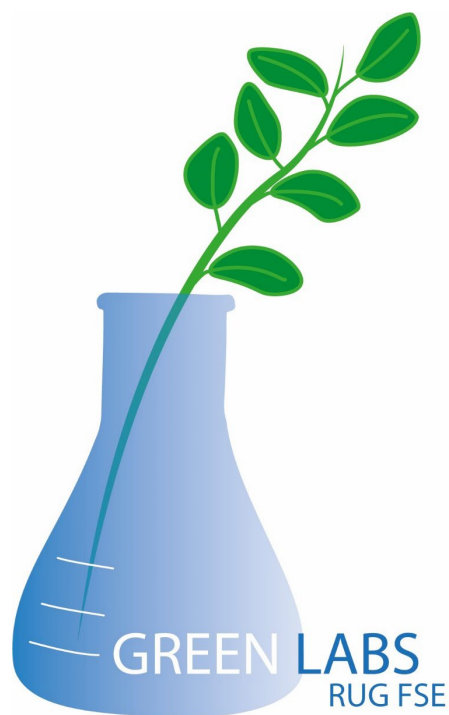

Figure S16: Logo of the Green Labs RUG team. Credit: M. M. Weber.

### 2.7.1 Recommended structure of a green lab grassroots team

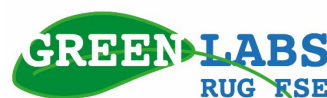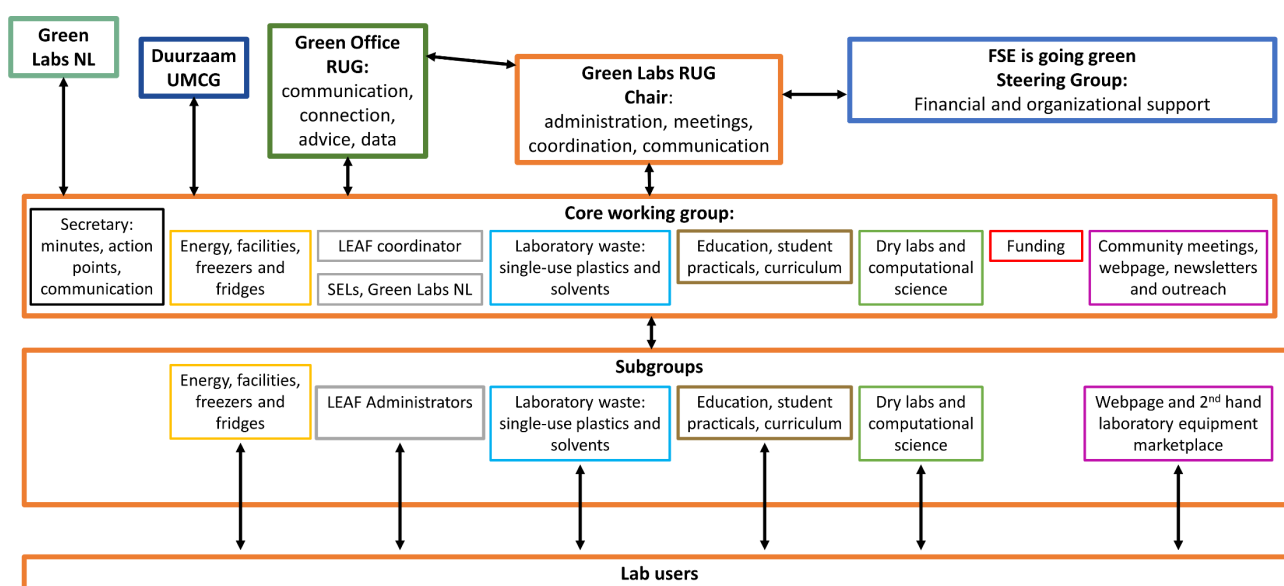

Figure S17: Recommended organizational structure of a Green Lab grassroots group covering all relevant aspects.

## 2.7.2 Laboratory efficiency assessment framework (LEAF) at FSE

The Green Lab initiative and the Laboratory Efficiency Accreditation Framework (LEAF) made quite some progress over the past two years. As of October 2023, there are 17 labs accredited with LEAF silver and 29 with LEAF bronze (46 labs in total). Student educational labs in Nijenborgh 4 are now fully accredited and assuring that future generations of students are directly familiarized with the concept of sustainable laboratory practices. There are several institutes represented in the LEAF accreditation such as GELIFES, Stratingh, ENTEG, GRIP, Bernoulli, GBB. Besides that, dry labs such as Computational Science and Mathematics are now able to join the LEAF framework as criteria and action points were expanded towards digital research. SRON and the Kapteyn institute are the most recent institutes to join the sustainable laboratory efforts.

All alternative products, networks, actions, and measures are put in a [comprehensive guidebook](#) written by the Green Lab team. Also, an [outreach movie](#) about sustainable laboratories has been made featuring Ben L. Feringa being fully supportive of the program in the future. Several future action points are being worked on at the moment such as improving and recycling of laboratory plastic consumables and a solvent recycling facility.

Extrapolating the reduced carbon impact of the accredited laboratories to all 46 accredited laboratories equals annual savings of **398 763 euros** as well as **477 107 kg of CO<sub>2</sub>**. These numbers are especially impressive when considering that many old laboratories still contain fume hoods with fixed air floor (thus are not reducing its flow when closed) and are chemical science related. Thus, there is no ultra-low temperature freezer existent in those spaces, both of which would increase the impact of these laboratory measures even further.

**Table S32:** Annual savings and emission numbers before and after accreditation of a 2-year-old laboratory in Linnaeusborg (Feringa CBBC, 5172.932), pricing is based on the electricity prices of December 2023.

| Feringa CBBC            | Before           |                                | After            |                                | Difference       |                                |
|-------------------------|------------------|--------------------------------|------------------|--------------------------------|------------------|--------------------------------|
| Category                | Annual Costs (€) | CO <sub>2</sub> Emissions (kg) | Annual Costs (€) | CO <sub>2</sub> Emissions (kg) | Annual Costs (€) | CO <sub>2</sub> Emissions (kg) |
| Waste                   | 3722.29          | 1612.94                        | 3722.29          | 1612.94                        | 0                | 0                              |
| Fume Cupboards          | 20451.19         | 28390                          | 20009.37         | 27680                          | 441.82           | 710                            |
| ULT Freezers            | n/a              | n/a                            | n/a              | n/a                            | n/a              | n/a                            |
| Refrigerators           | 408.36           | 260                            | 398.5            | 260                            | 9.86             | 0                              |
| Water                   | 561.6            | n/a                            | 374.4            | n/a                            | 187.2            | n/a                            |
| Biosafety Cabinets      | n/a              | n/a                            | n/a              | n/a                            | n/a              | n/a                            |
| - 20 °C Freezers        | 452.57           | 271                            | 434.5            | 260                            | 18.07            | 11                             |
| IT                      | 1123.2           | 870                            | 699.75           | 540                            | 423.45           | 330                            |
| Miscellaneous Equipment | 865.49           | 670                            | 761.44           | 590                            | 104.05           | 80                             |
| Sum                     | 27 585 €         | 32 074 kg                      | 26 400 €         | 30 943 kg                      | 1184 €           | 1131 kg                        |

**Table S33:** Annual savings and emission numbers before and after accreditation of a 2-year-old laboratory in Linnaeusborg (Lerch CBBC, 5172.944), pricing is based on the electricity prices of December 2023.

| Lerch group             | Before           |                                | After            |                                | Difference       |                                |
|-------------------------|------------------|--------------------------------|------------------|--------------------------------|------------------|--------------------------------|
| Category                | Annual Costs (€) | CO <sub>2</sub> Emissions (kg) | Annual Costs (€) | CO <sub>2</sub> Emissions (kg) | Annual Costs (€) | CO <sub>2</sub> Emissions (kg) |
| Waste                   | 3722.29          | 1612.94                        | 3722.29          | 1612.94                        | 0                | 0                              |
| Fume Cupboards          | 16966.88         | 23940                          | 16525.06         | 23220                          | 441.82           | 720                            |
| ULT Freezers            | n/a              | n/a                            | n/a              | n/a                            | n/a              | n/a                            |
| Refrigerators           | 209.1            | 140                            | 199.25           | 130                            | 9.85             | 10                             |
| Water                   | 678.6            | n/a                            | 161.46           | n/a                            | 517.14           | n/a                            |
| Biosafety Cabinets      | n/a              | n/a                            | n/a              | n/a                            | n/a              | n/a                            |
| - 20 °C Freezers        | 452.57           | 271                            | 434.5            | 260                            | 18.07            | 11                             |
| IT                      | 795.6            | 620                            | 410.59           | 320                            | 385.01           | 300                            |
| Miscellaneous Equipment | 1834.25          | 1430                           | 490.43           | 380                            | 1343.8           | 1050                           |
| <b>Sum</b>              | <b>24 659 €</b>  | <b>28 014 kg</b>               | <b>21 944 €</b>  | <b>25 923 kg</b>               | <b>2716 €</b>    | <b>2091 kg</b>                 |

**Table S34:** Annual savings and emission numbers before and after accreditation of 15 old laboratories in Nijenborgh (educational laboratories), pricing is based on the electricity prices of December 2023.

| Educational labs        | Before           |                                | After            |                                | Difference       |                                | Difference of 15 laboratories |                                |
|-------------------------|------------------|--------------------------------|------------------|--------------------------------|------------------|--------------------------------|-------------------------------|--------------------------------|
| Category                | Annual Costs (€) | CO <sub>2</sub> Emissions (kg) | Annual Costs (€) | CO <sub>2</sub> Emissions (kg) | Annual Costs (€) | CO <sub>2</sub> Emissions (kg) | Annual Costs (€)              | CO <sub>2</sub> Emissions (kg) |
| Waste                   | 347.64           | 148.55                         | 347.64           | 148.55                         | 0                | 0                              | 0                             | 0                              |
| Fume Cupboards          | 37506.52         | 53360                          | 30959.91         | 43540                          | 6546.61          | 9820                           | 98199.15                      | 147300                         |
| ULT Freezers            | n/a              | n/a                            | n/a              | n/a                            | n/a              | n/a                            | n/a                           | n/a                            |
| Refrigerators           | 198.18           | 140                            | 198.18           | 140                            | 0                | 0                              | 0                             | 0                              |
| Water                   | 840.32           | n/a                            | 37.44            | n/a                            | 802.88           | n/a                            | 12043.2                       | n/a                            |
| Biosafety Cabinets      | n/a              | n/a                            | n/a              | n/a                            | n/a              | n/a                            | n/a                           | n/a                            |
| - 20 °C Freezers        | 376.06           | 280                            | 346.5            | 260                            | 29.56            | 20                             | 443.4                         | 300                            |
| IT                      | 419.33           | 330                            | 58.24            | 50                             | 361.09           | 280                            | 5416.35                       | 4200                           |
| Miscellaneous Equipment | 3357.99          | 2610                           | 1533.54          | 1190                           | 1824.45          | 1420                           | 27366.75                      | 21300                          |
| <b>Sum</b>              | <b>43 046 €</b>  | <b>56 869 kg</b>               | <b>33 481 €</b>  | <b>45 329 kg</b>               | <b>9565 €</b>    | <b>11 540 kg</b>               | <b>143 469 €</b>              | <b>173 100 kg</b>              |



### 2.7.2.1 Guide on how to audit laboratories

- Before going to the respective lab, open the answers in the LEAF software beforehand and go through them. Write down notes/questions about things that are a little unclear and ask during the auditing process.
- Things to look out for during auditing (bronze):
  - o waste funnels with lids used or round bottom flasks inside funnels of waste canisters
  - o fume hoods closed when not in use
  
  - o devices, equipment and light turned off when not in use
  - o devices and equipment have all stickers to indicate how to turn off (also stickers on fume hoods and rotavaps)
  - o multiplugs in use to make turning devices off convenient
  - o rotary evaporator has evaporation balls placed inside the water bath
  
  - o freezer temperatures are increased to from -80 to -70 and from -25 to -15
  - o fridge temperatures are increased from 4 degrees to 7 degrees
  
  - o introduction procedure on lab guidebook reading in place, where safety manager (*i.e.* Armico) also asks questions about it and safety, Lab guidebook can be provided by us: <https://doi.org/10.26434/chemrxiv-2023-g3lmq-v2> or <https://doi.org/10.59877/FCXC3888>
  - o departing staff has a procedure where chemicals are transferred to another person
  
  - o there is a chemical sharing system/inventory in place, chemicals are shared with others and ordered in minimal amounts
  - o equipment is shared with others via google calendar
  
  - o there are standard operating procedures (SOPs) for all devices
  
  - o waste separation takes place
  - o glass weighing boats to replace plastic one
- After the process (takes roughly about 1h), consider giving out the accreditation or in case things are missing to delay it until further notice
- Write a concluding email to the responsible sustainability manager and the lab manager covering all the points of action, that might be missing (cc other LEAF coordinators and administrators)
- Ask also if criteria in the LEAF software are unclear that those need to be updated by the users, specifically ask for confirmation for these changes before accepting the submission for the medal
- After you received the confirmation *via* email from the sustainability lab manager (on action points within the lab as well as updating the criteria in the online tool), you can approve the submission
- Send a final email to the lab manager and sustainability manager and congratulate them for a greener lab.
  - o Mention in that email that the baseline and progress calculators withing the LEAF software need to be filled in to advance to a silver level (this has to be checked in the next step)
- Irregular and spontaneous checks of labs will take place throughout the year if they comply with the requested changes and the LEAF accreditation
- Each lab needs to apply annually for new accreditation, so new checks should be conducted in the beginning of each year, which should be faster as the level of accreditation should have been maintained throughout the year
- It could be that lab users need a reminder for receiving a new accreditation in January of each year, which also may enhance engagement to advance to a higher level, the new check occurs the same as previous ones

### 2.7.2.2 Checklist for finishing group members: Postdocs, PhD-students, and Master students

Example of Feringa group, Stratingh Institute for Chemistry

| Responsibilities                                                                                          | Checked by student                            | Checked by supervisor          |
|-----------------------------------------------------------------------------------------------------------|-----------------------------------------------|--------------------------------|
| All vials have been labeled and stored properly. A list of all compounds to be stored has been compiled.* |                                               |                                |
| All relevant synthesized chemicals have been passed on to another PhD student.*                           |                                               |                                |
| All personal commercial chemicals have been relocated                                                     |                                               |                                |
| The N <sub>2</sub> line has been cleaned                                                                  |                                               |                                |
| The fume hood has been cleared and cleaned                                                                |                                               |                                |
| The personal drawer and bench have been cleared and cleaned                                               |                                               |                                |
| <u>If using an oil pump</u> : the oil has been changed and the vacuum has been checked                    | Serial no pump:<br>Lowest vacuum:        mbar |                                |
| <u>For membrane pumps</u> : the vacuum has been checked                                                   | Serial no pump:<br>Lowest vacuum:        mbar |                                |
| All paper lab books have been handed to the supervisor and a pdf has been made.                           |                                               |                                |
| All analytical data has been properly stored**                                                            |                                               |                                |
| White lab card and office key have been given to responsible person                                       |                                               | Checked by responsible person: |

\* For compiling the list, please include: experiment number, date of synthesis, chemical structure, amount of the product, the appearance and any other extra helpful comments. The list also needs to contain the newly assigned owner. Please discuss proper location of samples with your lab manager/supervisor/PI. The list should also be provided to the laboratory manager to be added to the chemical database. Use a label writer to label the vials.

\*\*According to the group data management plan and in agreement with your supervisor/PI.

Name:

Personal email for future contact:

Signature of student

Name                      of                      supervisor:

Signature of supervisor

### 2.7.2.3 Accreditation award and door signs.

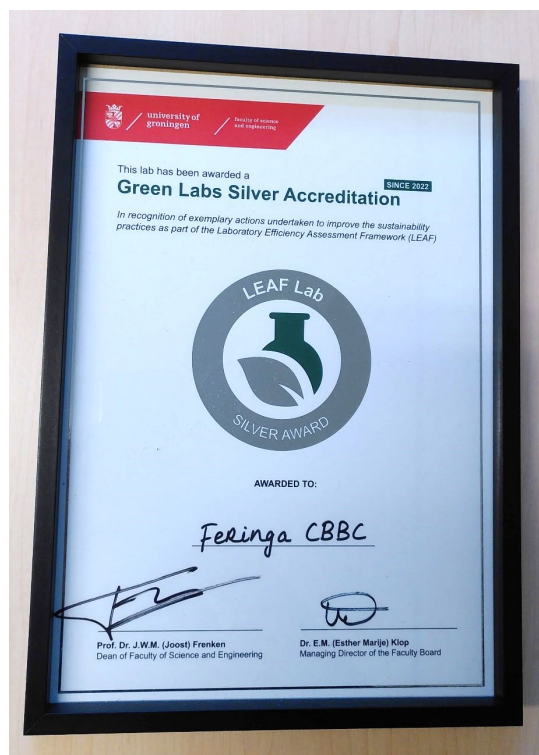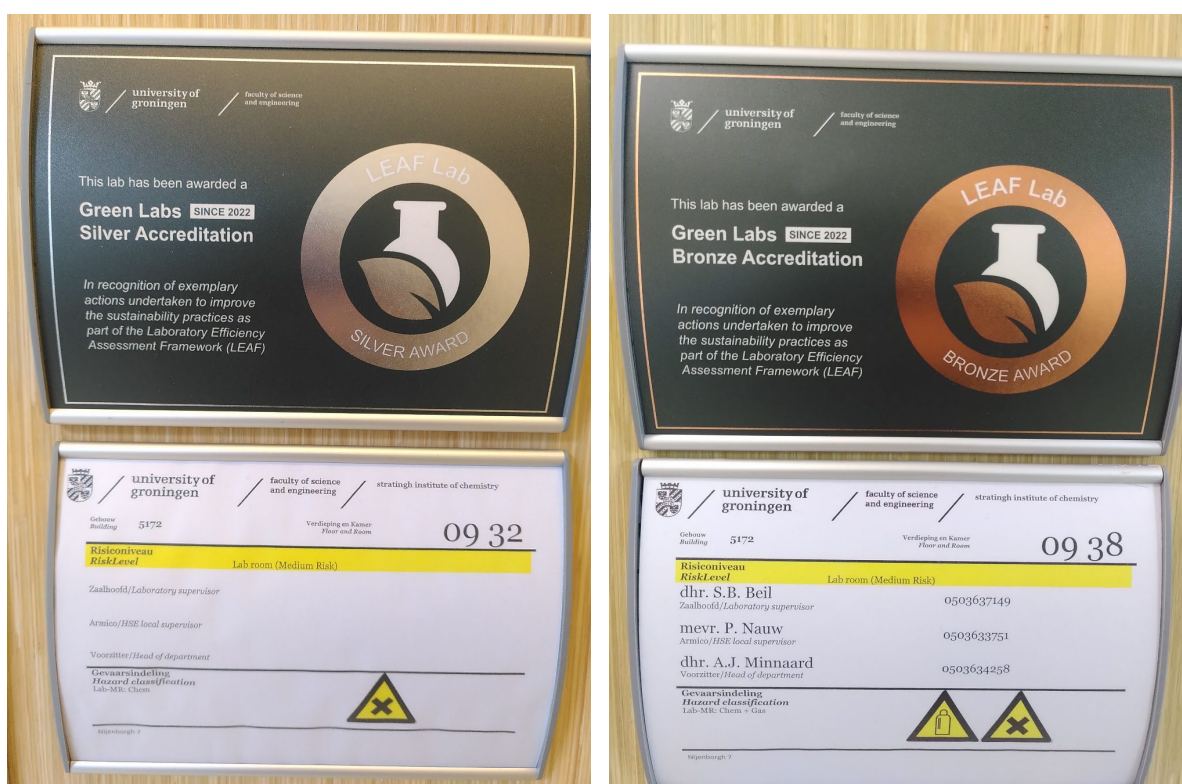

**Figure S18:** Green Labs Accreditation through LEAF. Award being presented to each laboratory (top). Silver and bronze door signs next to location and description of laboratory (bottom).

## 2.7.3 Energy measurements, list of equipment, funding

### Energy fund (2023)

In 2023 many lab groups of FSE have applied for an energy fund to replace inefficient laboratory equipment, of which the majority has been approved. Many old devices will be substituted for more energy-efficient ones, which will not only improve job satisfaction but also save more than 50 000 kWh on a yearly basis.

#### 2.7.3.1 Fume hoods

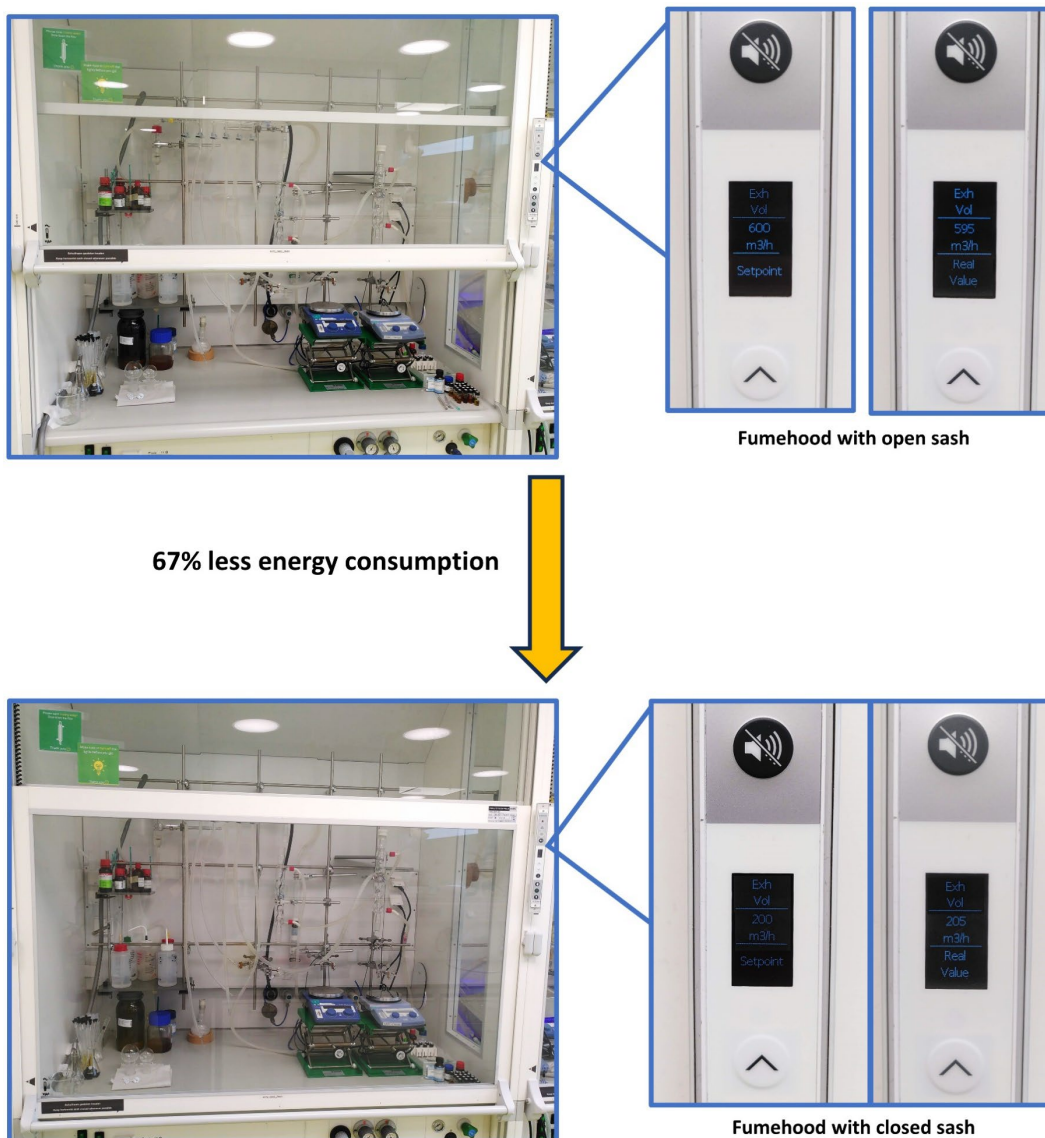

**Figure S19:** Keep fume hoods closed as much as possible, it reduces energy consumption to supply input air by 67%.

Note: Most fume cupboard fan systems work at a constant rate and reduction in flow rate of a single fume hood is not the same as reduction in energy. Extract fans on the roof probably do not ramp down when a fume cupboard sash is lowered but operate at a constant power. However, less energy may be required to supply input air by closing the sashes *via* reduction of flowrates. Ultimately, we recommend night setbacks on the fans on the roof to reduce energy consumption most effectively.



**Table S35:** Measurements on automated closing time of fume hood sashes in different laboratories.

| Fumehood Experiment                                    | Sash opening stand | Start Time | Closing Time | Time (min)     |
|--------------------------------------------------------|--------------------|------------|--------------|----------------|
| <b>Lab 932</b>                                         |                    |            |              |                |
| Fumehood left                                          | High               | 0:14s      | 5:15s        | 5              |
| Fumehood left                                          | Middle             | 0:14s      | 5:15s        | 5              |
| Fumehood Middle                                        | High               | 0:16s      | 5:29s        | 5              |
| Fumehood Middle                                        | Middle             | 0:14s      | 7:14s        | 7              |
| <b>Lerch lab</b>                                       |                    |            |              |                |
| Fumehood left                                          | Middle             | 0:14s      | 3:18s        | 3              |
| Fumehood Middle                                        | High               | 0:14s      | 3:18s        | 3              |
| Fumehood Right                                         | Middle             | 0:14s      | 3:18s        | 3              |
| <b>Total average closing time for automated sensor</b> |                    |            |              | <b>4.4 min</b> |

In new laboratories fume hoods are often equipped with a light sensor and an automated closing system. Here the sash closes automatically after 5 minutes. However, lab users should check regularly on the light sensors ensuring they are still functional to keep the automated closing system running. This automated closing system should stay enabled at all times and not be turned off. Any issues should be reported to facilities management immediately.

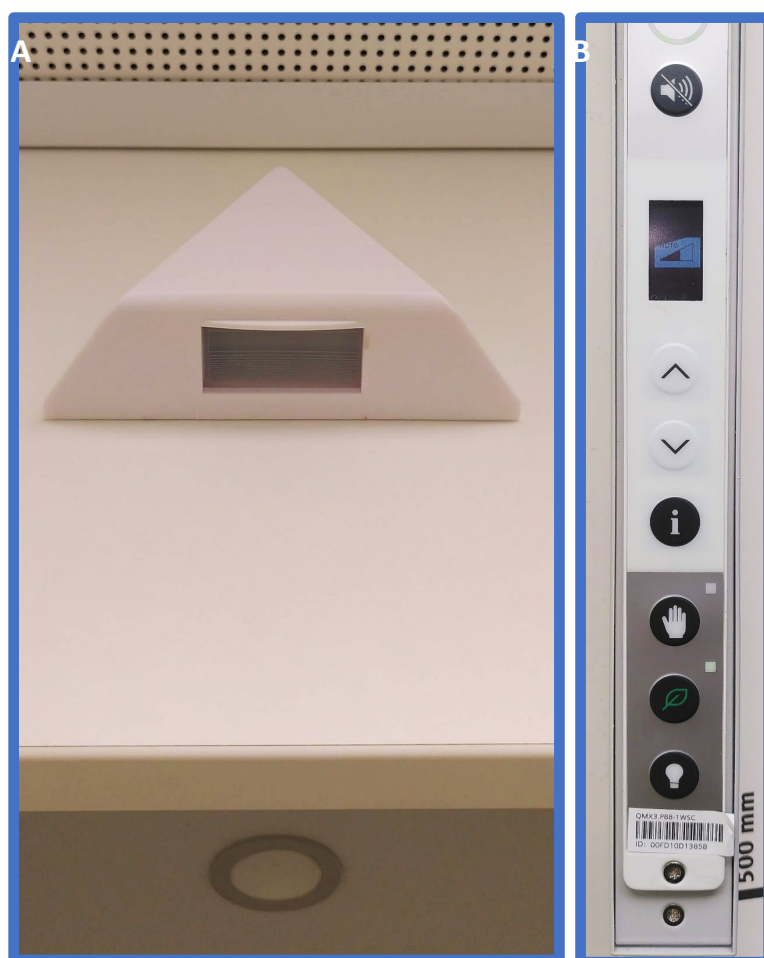

**Figure S20:** a) Ensure that the light sensors are functional at all times. b) Do not change the settings of the fume hood to keep the automated closing system enabled.

### 2.7.3.2 Ultra-low temperature (ULT) freezers

**Table S36:** Energy consumption and measurements of ULT freezers at  $-80\text{ }^{\circ}\text{C}$  or  $-70\text{ }^{\circ}\text{C}$ . *The following data has been acquired through R.J.W. Visser, N. Elzinga, D. Lijdsman, T. Freese, M. Kammuller, and R. Kat. and is being published with permission of the Faculty of Science and Engineering, University of Groningen. a) Energy consumption before freezer cleaning. b) Energy consumption after freezer cleaning.*

| Model                                | Energy use (average per year kWh) | Energy use (average per day kWh) | Manufacturers energy consumption (kWh) | Temperature setpoint | Volume | W L <sup>-1</sup> d <sup>-1</sup> |
|--------------------------------------|-----------------------------------|----------------------------------|----------------------------------------|----------------------|--------|-----------------------------------|
| Eppendorf CryoCube FC570             | 2781                              | 7.6                              | 10.5                                   | -70                  | 570    | 13.4                              |
| Eppendorf CryoCube FC660             | 3614                              | 9.9                              | 10.6                                   | -70                  | 660    | 15.0                              |
| Eppendorf / New Brunswick U570       | 4163                              | 11.4                             | 11.8                                   | -80                  | 570    | 20.0                              |
| Eppendorf / New Brunswick U410       | 2560                              | 7.0                              | 10.8                                   | -70                  | 410    | 17.1                              |
| Eppendorf / New Brunswick U725       | 4475                              | 12.3                             | 15.8                                   | -70                  | 725    | 16.9                              |
| Eppendorf / New Brunswick U410       | 5217                              | 14.3                             | 10.8                                   | -70                  | 410    | 34.9                              |
| Eppendorf / New Brunswick U570       | 3598 <sup>a</sup>                 | 9.9                              | 10.8                                   | -70                  | 570    | 17.3 <sup>a</sup>                 |
|                                      | 3222 <sup>b</sup>                 | 8.8                              |                                        |                      |        | 15.5 <sup>b</sup>                 |
| Haier DW-86W420                      | 4419                              | 12.1                             | 12.5                                   | -70                  | 420    | 28.8                              |
| Haier DW-86L628E                     | 4062                              | 11.1                             | 18.0                                   | -80                  | 626    | 17.8                              |
| Haier DW-86L628E                     | 4068                              | 11.1                             | 18.0                                   | -70                  | 626    | 17.8                              |
| Haier DW-86L628                      | 5561                              | 15.2                             | 18.0                                   | -70                  | 626    | 24.3                              |
| New Brunswick C66085                 | 4379                              | 12.0                             | 14.3                                   | -70                  | 660    | 18.2                              |
| New Brunswick, U410-86HEF            | 2181                              | 6.0                              | 10.8                                   | -70                  | 410    | 14.6                              |
| New Brunswick U101 -86               | 2279                              | 6.2                              | 8.8                                    | -70                  | 101    | 61.8                              |
| New Brunswick, U410 premium          | 3619                              | 9.9                              | 10.8                                   | -80                  | 410    | 24.2                              |
| New Brunswick, C340 premium          | 4252                              | 11.6                             | 8.8                                    | -70                  | 340    | 34.3                              |
| New Brunswick C660 HEF               | 3488                              | 9.6                              | 11.4                                   | -70                  | 660    | 14.5                              |
| New Brunswick C340-86                | 3393                              | 9.3                              | 10.8                                   | -70                  | 410    | 22.7                              |
| New Brunswick U725-86                | 3704                              | 10.1                             | 15.8                                   | -70                  | 725    | 14.0                              |
| New Brunswick U410-86                | 2358                              | 6.5                              | 8.8                                    | -70                  | 340    | 19.0                              |
| New Brunswick Scientific, U570-86 EU | 5107                              | 14.0                             | 11.8                                   | -80                  | 570    | 24.5                              |
| New Brunswick High Efficiency C660   | 3144                              | 8.6                              | 11.4                                   | -70                  | 660    | 13.1                              |
| New Brunswick C660                   | 3999                              | 11.0                             | 14.3                                   | -70                  | 660    | 16.6                              |
| New Brunswick C660                   | 3786                              | 10.4                             | 14.3                                   | -70                  | 660    | 15.7                              |
| New Brunswick C660 Premium           | 3460                              | 9.5                              | 14.3                                   | -70                  | 660    | 14.4                              |
| New Brunswick C340 Premium           | 2752                              | 7.5                              | 8.8                                    | -70                  | 340    | 22.2                              |
| New Brunswick Innova C585            | 3405                              | 9.3                              | 13.6                                   | -70                  | 585    | 15.9                              |
| New Brunswick Innova U535            | 4521                              | 12.4                             | 13.2                                   | -70                  | 535    | 23.2                              |
| New Brunswick C542-85                | 4235                              | 11.6                             | n/a                                    | -80                  | 542    | 21.4                              |
| New Brunswick Model C585             | 2580                              | 7.1                              | 13.6                                   | -70                  | 585    | 12.1                              |
| New Brunswick C340-86                | 7743                              | 21.2                             | 8.8                                    | -80                  | 340    | 62.4                              |
| New Brunswick C340-86                | 7299                              | 20.0                             | 8.8                                    | -80                  | 340    | 58.8                              |
| New Brunswick U410 -86               | 4599                              | 12.6                             | 10.8                                   | -80                  | 410    | 30.7                              |
| New Brunswick Scientific C542-85     | 3651                              | 10.0                             | 10.0                                   | -70                  | 542    | 18.5                              |
| Panasonic MDF- DC500VX-PE            | 4337                              | 11.9                             | 15.5                                   | -70                  | 575    | 20.7                              |
| Panasonic MDF-594-PE                 | 6461                              | 17.7                             | 21.6                                   | -70                  | 487    | 36.3                              |
| Panasonic MDF-DC500VX-PE             | 4906                              | 13.4                             | 15.5                                   | -70                  | 575    | 23.4                              |
| Sanyo MDF-394                        | 3664                              | 10.0                             | 13.2                                   | -70                  | 309    | 32.5                              |
| Sanyo MDF-594                        | 6804                              | 18.6                             | 21.6                                   | -70                  | 487    | 38.3                              |
| Sanyo MDF-594                        | 7342                              | 20.1                             | 21.6                                   | -80                  | 487    | 41.3                              |
| Sanyo Ultra Low MDF-594              | 7475                              | 20.5                             | 21.6                                   | -70                  | 594    | 34.5                              |
| Sanyo MDF-U73V                       | 7789                              | 21.3                             | 21.4                                   | -70                  | 728    | 29.3                              |
| Sanyo MDF-U33V                       | 3707                              | 10.2                             | 9,2                                    | -80                  | 333    | 30.5                              |
| Sanyo MDF-U33V                       | 3961                              | 10.9                             | 9,2                                    | -80                  | 333    | 32.6                              |
| Sanyo MDF-794                        | 9778                              | 26.8                             | 21.1                                   | -70                  | 701    | 38.2                              |
| Thermo Scientific Model 5819         | 3999                              | 11.0                             | 13.0                                   | -70                  | 481    | 22.8                              |
| Thermo Scientific TSX400V            | 3322                              | 9.1                              | 9.1                                    | -70                  | 548    | 16.6                              |

### 2.7.3.3 Information on how to check freezer efficiency

#### Recommendations:

- Prioritize ULT freezers larger than 500 L, which consume 10 kWh per day or less.

| Performance                                                     |
|-----------------------------------------------------------------|
| Bad energy efficiency (> 30 watts / Liter / day)                |
| Critical energy efficiency ( $25 < x < 30$ watts / Liter / day) |
| Medium Energy efficiency ( $20 < x < 25$ watts / Liter / day)   |
| Good energy efficiency ( $13.5 < x < 20$ watts / Liter / day)   |
| Great energy efficiency (< 13.5 watts / Liter / day)            |

Increasing the temperature of a  $-80^{\circ}\text{C}$  freezer to  $-70^{\circ}\text{C}$  reduces its energy consumption up to 30%.

#### **Example images of well-maintained freezers:**

[https://www.freezerchallenge.org/uploads/2/1/9/4/21945752/minus-70-is-the-new-minus-80\\_3.pdf](https://www.freezerchallenge.org/uploads/2/1/9/4/21945752/minus-70-is-the-new-minus-80_3.pdf)

<https://www.nature.com/articles/d42473-021-00361-7>

<https://www.exeter.ac.uk/about/sustainability/sustainablelabs/energy/ultfreezers/>

#### Further actions:

- Check if people conduct maintenance i.e. cleanup of the freezer and defrosting twice per year.
- Check if door seals are not blocked by excess ice or frost, and close securely.
- Check if they clean filters from dust accumulation every 3 months as it increases energy consumption by 14%-25%. Check if the filters are clean.
- Have proper spacing for the freezer and assess the ambient temperature of the room.
- Open and close the doors quickly (less than 30-45 seconds) to avoid frost buildup and a rise in temperature. Well-maintained freezers have inner doors that are able to be closed / with not too much ice on them.
- Keep an updated inventory list of samples inside the freezer and sort out unneeded samples.

#### **Replacement of inefficient freezers:**

As of March 2024, all ULT-freezers at the Faculty of Science and Engineering have been measured to assess energy efficiency. Inefficient models were evaluated against the years for return of investment (ROI). When the ROI was assessed to less than 8 years, the Green Lab team is planning to replace such models in 2024. The collective expected costs, without possible discounts, for 7 models determined is 94 368.69 €. By replacing these the faculty will save up to 35 017 kWh / year. Thus, the ROI for all 7 models together will be to  $(94\,368.69\text{ €} / (35\,017\text{ kWh} * 0.30\text{€} =))$  8.98 years.

## 2.7.3.4 Miscellaneous laboratory devices and equipment

**Table S37:** Energy consumption of various devices and equipment in laboratory spaces. *The following data has been acquired through T. Freese and J. Y. de Boer and is being published with permission of the Faculty of Science and Engineering, University of Groningen.*

| Equipment (Lab 932, Feringa)       | Temperature or other specifications     | Power Usage (W) | Energy Usage (kWh) | Energy Average per day (kWh) | Energy average per year (kWh) | Annual kWh when idle |
|------------------------------------|-----------------------------------------|-----------------|--------------------|------------------------------|-------------------------------|----------------------|
| Fridge #1                          | 5 degrees (13W)                         | -               | 5                  | 0.72                         | 262                           | -                    |
| Fridge #2                          | 7 degrees (14.1W)                       | -               | 8.6                | 0.73                         | 265                           | -                    |
| Balance                            | 3.4W when not in use                    | -               | 0.7                | 0.06                         | 21                            | 29.78                |
| Balance                            | 2.0W when not in use                    | -               | 0.5                | 0.04                         | 15                            | -                    |
| Ultrasonic bath                    | 0.3W when not in use                    | -               | 0                  | 0.00                         | 0                             | -                    |
| Vortex                             | 0.0W when not in use                    | -               | 0.3                | 0.02                         | 9                             | -                    |
| pH meter                           | -                                       | -               | -                  | -                            | -                             | 0                    |
| Oven                               | -                                       | -               | -                  | -                            | -                             | 0                    |
| TLC lamp                           | -                                       | -               | -                  | -                            | -                             | 0                    |
| <b>Lab NB (Feringa)</b>            |                                         |                 |                    |                              |                               |                      |
| <b>Stirring plates</b>             |                                         |                 |                    |                              |                               |                      |
| IKA basic                          | Metal heating block                     | -               | 0.10               | 1.91                         | 698.40                        | -                    |
| IKA basic standard 1.0             | Metal heating block                     | -               | 0.07               | 1.52                         | 556.07                        | -                    |
| IKA basic standard 1.0             | Oil bath                                | -               | 0.18               | 1.93                         | 704.69                        | -                    |
| IKA basic standard 2.0             | Metal heating block                     | -               | 0.16               | 1.74                         | 634.61                        | -                    |
| <b>Rotary evaporator bath</b>      |                                         |                 |                    |                              |                               |                      |
| Buchi R-210 with balls             | 55.7 reduced energy                     | -               | 0.18               | 1.46                         | 531.44                        | -                    |
| Buchi R-210 without balls          | -                                       | -               | 0.11               | 3.28                         | 1198.37                       | -                    |
| Heidolph Hei-VAP                   | -                                       | -               | 0.08               | 1.40                         | 512.62                        | -                    |
| Buchi R-300                        | -                                       | -               | 0.08               | 1.31                         | 478.88                        | -                    |
| IKA RV8                            | -                                       | -               | 0.03               | 1.54                         | 561.85                        | -                    |
| <b>Oven</b>                        |                                         |                 |                    |                              |                               |                      |
| Thermo Scientific oven             | -                                       | -               | 0.57               | 4.80                         | 1750.98                       | -                    |
| <b>Energy Measurements (Lerch)</b> |                                         |                 |                    |                              |                               |                      |
| Rotavap (both)                     | only right thing uses energy            | -               | 0.5                | 0.06                         | 20                            | -                    |
| Balance                            | uses energy when off, multiplug (4.2 W) | -               | 0.4                | 0.04                         | 16                            | -                    |
| Orbital Mixer                      | -                                       | -               | 0                  | 0.00                         | 0                             | -                    |
| Shutter                            | Dymax, 0.3 W, Multiplug                 | -               | 2                  | 0.22                         | 82                            | -                    |
| Oven                               | -                                       | -               | 4.6                | 0.51                         | 188                           | -                    |
| Goedhoudt Airconditioning          | -                                       | -               | 19.1               | 2.68                         | 980                           | -                    |
| <b>Life sciences</b>               |                                         |                 |                    |                              |                               |                      |
| Gallenkamp incubator with fan      | 50°C                                    | 302.20          | 0.23               | 2.56                         | 933.95                        | -                    |
| Marius Utrecht incubator 28°C      | -                                       | 443.80          | 1.16               | 0.99                         | 360.42                        | -                    |
| WTC Binder incubator 37°C          | 60.4 W low; 620 W high                  | 63.50           | 0.19               | 1.46                         | 531.25                        | -                    |
| Inventum incubator 50°C            | -                                       | 385.80          | 0.96               | 1.21                         | 440.83                        | -                    |
| Marius Utrecht incubator 28°C      | -                                       | 213.50          | 0.20               | 1.97                         | 718.68                        | -                    |
| New Brunswick shaker               | -                                       | 33.80           | 0.16               | 0.79                         | 288.53                        | -                    |
| New Brunswick shaker with cooling  | 69.4 W;<br>49.3 W low; 741.2 W high     | 69.40           | 1.04               | 1.27                         | 462.01                        | -                    |

### Vacuum pumps

The vacuum pumps of the Feringa group can be divided in two categories, oil pumps and membrane pumps. Oil pumps draw significantly more power and are less chemical resistant than membrane pumps. However, the amount of vacuum it can reach is way lower (around 10<sup>-3</sup> mbar compared to 10<sup>-20</sup> mbar). Thus, still important for our research.

The power draw of vacuum pumps is stable under the same load. However, more power is required to push air through a vacuum pump. The pump was run for 10 min to reach stable state. Afterwards the closed power draw was noted. Then, the vacuum pump was opened to air to measure the open power draw.

| Results oil pumps Type | Power usage (open) | Power usage (closed) |
|------------------------|--------------------|----------------------|
| Duo M6 Oilpump         | 505 W              | 315 W                |
| Atlas copco            | 310 W              | 265 W                |
| Edwards 3              | 280 W              | 270 W                |

| Results membrane pumps Type | Power usage (open) | Power usage (closed) |
|-----------------------------|--------------------|----------------------|
| Heidolph valve control      | 240 W              | 199 W                |
| KNF N820                    | 98 W               | 92 W                 |
| KNF                         | 130 W              | 37 W                 |
| KNF N840                    | 180 W              | 162 W                |

### Stirring and heating plates, metal heating blocks as oil bath replacements

Stirring plates have a peak load in the heating phase, followed by a periodic load to maintain the temperature. Measuring the peak load is not insightful since this depends on the heating element inside of the plate. Thus, only the efficiency of maintaining a certain temperature during the periodic load was measured.

For all measurements the same heating block/ oil bath was used. Energy consumption in kWh was measured over a period of at least one hour. Afterwards the kWh was divided by the number of hours to obtain the average amount of watt.

Results heating block at 100°C and 1000 RPM (\* oil bath)

| Type                    | Power usage |
|-------------------------|-------------|
| Ika basic               | 80 W        |
| IKA basic standard 1.0  | 63 W        |
| IKA basic standard 1.0* | 80 W        |
| IKA basic standard 2.0  | 72 W        |

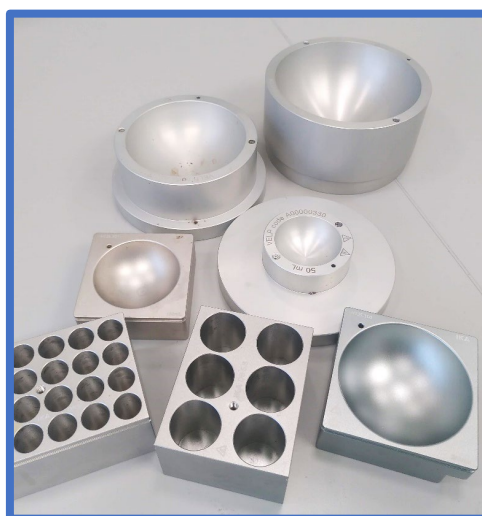

**Figure S21:** Metal heating block as efficient and safe replacement for oil heating baths. *Image reproduced from previously published guidebook (<https://doi.org/10.26434/chemrxiv-2023-g3lmq-v2>).*

### Rotary evaporators

The power draw of the rotary evaporator depends on three factors. The vacuum pump, water bath and the rotating speed. The power draw of the vacuum pumps was tested before and the power draw of the rotation is not very significant (around 10 Watts max.). Thus, only the water baths were tested. Tests were performed similar to the heating plates.

For all measurements the bath was set to 60°C. The energy consumption was measured in kWh for at least one hour. Afterwards the kWh was divided by the number of hours to obtain the average amount of watt.

Results rotary evaporator baths (\*without condensation balls)

| Type             | Power usage |
|------------------|-------------|
| Buchi R-210      | 61 W        |
| Buchi R-210*     | 138 W       |
| Heidolph hei-vap | 58 W        |
| Buchi R-300      | 55 W        |
| IKA RV 8         | 64 W        |

Ensure water baths have a cover. For instance, use plastic water bath balls for rotary evaporators to cover the open water (**Figure S22**). They prevent heat loss, evaporation (up to 90%), reduce oxygen input, reduce odors and levels of algae growth in the water.

- Avoid running the rotary evaporator overnight, unless required.

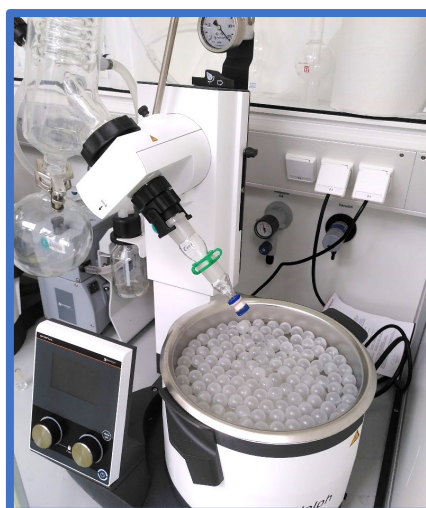

**Figure S22:** Plastic balls in the water bath of a rotary evaporator to prevent energy loss in form of heat. *Image reproduced from previously published guidebook (<https://doi.org/10.26434/chemrxiv-2023-q3lmq-v2>).*

### Oven

An oven works very similar to the stirring plates as well. Energy consumption was measured overnight at 135 °C.

| Type              | Power usage |
|-------------------|-------------|
| Thermo scientific | 200 W       |

### Conclusion

The difference in energy consumption within each category is not very significant when adjusting for the specification. For example, the difference within the membrane pumps is rather big 37-199 Watts. However, the more efficient one is not designed for a rotary evaporator.

The latest efforts to buy heating blocks and the condensation balls have a way bigger impact than a more efficient device (*i.e.* pumps or oven) could achieve.

### 2.7.3.5 Devices and their power distribution in a laboratory

**Table S38:** Energy consumption measurements of each device present in a research laboratory. Each device was measured for 40 days. As fume hoods were not included in the measurement, ULT freezers are the highest consuming equipment in the lab space measured. *The following data has been acquired through R.J.W. Visser and is being published with permission of the Faculty of Science and Engineering, University of Groningen.*

| Device                          | Type              | NEN code                  | Total acc. power consumption (kWh) | Percentage of total | Annual consumption (kWh) |
|---------------------------------|-------------------|---------------------------|------------------------------------|---------------------|--------------------------|
| NB -77 °C                       | -80°C freezer     | 20156                     | 848.6                              | 24.5                | 7743                     |
| NB -77 °C                       | -80°C freezer     | 21055                     | 799.9                              | 23.1                | 7299                     |
| Freezer + cold trap + speedvac. | Freezer           | 29508                     | 306.1                              | 8.8                 | 2793                     |
| NB -70°C                        | -80°C freezer     | 24808                     | 282.7                              | 8.2                 | 2579                     |
| Oven Depex 100 °C               | Oven              | 21014                     | 137.6                              | 4.0                 | 1256                     |
| PCR nanodrop + PC               | PCR               | 29511                     | 109.0                              | 3.1                 | 995                      |
| Crate freezer                   | Freezer           | 22044                     | 89.3                               | 2.6                 | 815                      |
| Ice machine                     | Ice machine       | 24943                     | 87.2                               | 2.5                 | 795                      |
| Fridge R18                      | Fridge            | 21020                     | 59.1                               | 1.7                 | 539                      |
| Oven Sanyo incubator            | Oven              | 21120                     | 57.0                               | 1.6                 | 520                      |
| Fridge R18 MC0123               | Fridge            | 26899                     | 53.7                               | 1.5                 | 490                      |
| Freezer WK6                     | Freezer           | 20948                     | 49.4                               | 1.4                 | 451                      |
| PC001342                        | PC (incl. screen) | none                      | 49.1                               | 1.4                 | 448                      |
| Biorad FPLC+PC                  | System            | 004355,015411,26883,26844 | 43.6                               | 1.3                 | 398                      |
| Fridge R5H                      | Fridge            | 29514                     | 31.4                               | 0.9                 | 287                      |
| Freezer VK5                     | Freezer           | 24970                     | 31.0                               | 0.9                 | 283                      |
| Panasonic 37°C incubator        | Incubator         | 26077                     | 29.4                               | 0.8                 | 268                      |
| Freezer MI051                   | Freezer           | 27015                     | 29.0                               | 0.8                 | 265                      |
| FreezerWK15                     | Freezer           | 24979                     | 29.0                               | 0.8                 | 265                      |
| Autoclave                       | Autoclave         | 21521                     | 27.6                               | 0.8                 | 252                      |
| Autoclave                       | Autoclave         | 20964                     | 26.4                               | 0.8                 | 241                      |
| Freezer VK20                    | Freezer           | 26898                     | 20.5                               | 0.6                 | 187                      |
| Water Boiler                    | Boiler            |                           | 19.5                               | 0.6                 | 178                      |
| Fridge R1K                      | Fridge            | 26896                     | 18.9                               | 0.5                 | 172                      |
| Fridge KK3                      | Fridge            | 24969                     | 17.7                               | 0.5                 | 162                      |
| Fridge R15                      | Fridge            | 21249                     | 17.2                               | 0.5                 | 157                      |
| MilliQ                          | MilliQ            | 26902                     | 17.2                               | 0.5                 | 157                      |
| Fridge 390 (Below R18)          | Fridge            | 20955                     | 17.2                               | 0.5                 | 157                      |
| Fridge R17                      | Fridge            | 26919                     | 16.8                               | 0.5                 | 153                      |
| Freezer VK9                     | Freezer           | 24967                     | 16.8                               | 0.5                 | 153                      |
| Eppendorf centrifuge            | Centrifuge        | 26910                     | 16.4                               | 0.5                 | 150                      |
| IKA Stirrer                     | Stirrer           | 26877                     | 15.5                               | 0.4                 | 141                      |
| M1031                           | Fridge            | 26911                     | 15.1                               | 0.4                 | 138                      |
| Fridge R4                       | Fridge            | 24966                     | 14.5                               | 0.4                 | 132                      |
| Fridge R3                       | Fridge            | 24968                     | 11.6                               | 0.3                 | 106                      |
| PC Screen AOC                   | Monitor           | 41056                     | 10.4                               | 0.3                 | 95                       |
| Sharp amplifier                 | Entertainment     | 21048                     | 9.8                                | 0.3                 | 89                       |
| VWR heatblock                   | Heat block        | 26099                     | 6.5                                | 0.2                 | 60                       |
| Synergy Plate Reader            | Other             | 27018                     | 6.2                                | 0.2                 | 56                       |
| Weighing scale                  | Scale             | 20978                     | 5.9                                | 0.2                 | 53                       |
| Memmert 25°C incubator          | Incubator         | 26076                     | 4.8                                | 0.1                 | 44                       |
| Lenovo ThinkCentre              | PC                | 41045                     | 2.9                                | 0.1                 | 27                       |

|                                       |               |       |                 |             |                   |
|---------------------------------------|---------------|-------|-----------------|-------------|-------------------|
| <b>Ker balance</b>                    | Scale         | 26374 | 2.7             | 0.1         | 25                |
| <b>2x PS Bunsen burner</b>            | Transformer   | 20916 | 1.9             | 0.1         | 18                |
| <b>2x PS Bunsen burner</b>            | Transformer   | 20918 | 1.9             | 0.1         | 18                |
| <b>Sartorius scale</b>                | Scale         | 21507 | 1.2             | 0.0         | 11                |
| <b>Centrifuge</b>                     | Centrifuge    | 26894 | 0.8             | 0.0         | 8                 |
| <b>Licor Odessey</b>                  | Other         | 27017 | 0.6             | 0.0         | 5                 |
| <b>Biorad powerpack 300</b>           | Other         | 20957 | 0.5             | 0.0         | 5                 |
| <b>Eppendorf centrifuge</b>           | Centrifuge    | 29515 | 0.5             | 0.0         | 4                 |
| <b>Centrifuge Sorvallegend</b>        | Centrifuge    | 21018 | 0.15            | 0.0         | 1                 |
| <b>Biorad powerpack 200</b>           | Other         | 28414 | 0.1             | 0.0         | 1                 |
| <b>IKA magnetic stirrer reo.</b>      | Stirrer       | 21469 | 0.0             | 0.0         | 0                 |
| <b>Labinco vortex</b>                 | Vortex        | 24973 | 0.0             | 0.0         | 0                 |
| <b>Microman pipette boy</b>           | Small         | none  | 0.0             | 0.0         | 0                 |
| <b>Egg centrifuge</b>                 | Centrifuge    | 21304 | 0.0             | 0.0         | 0                 |
| <b>Roth egg centrifuge</b>            | Centrifuge    | 26075 | 0.0             | 0.0         | 0                 |
| <b>Salm and kipp.</b>                 | Shaker        | 21039 | 0.0             | 0.0         | 0                 |
| <b>VWR vacuum pump</b>                | Pump          | 26886 | 0.0             | 0.0         | 0                 |
| <b>Fridge MI052</b>                   | Fridge        | 27015 | 0.0             | 0.0         | 0                 |
| <b>LG Shaker</b>                      | Shaker        | 26889 | 0.0             | 0.0         | 0                 |
| <b>Martin Hume Sealer</b>             | Vacuum Sealer | 26892 | 0.0             | 0.0         | 0                 |
| <b>Mick1 Stirrer</b>                  | Stirrer       | 20903 | 0.0             | 0.0         | 0                 |
| <b>Pipette boy MI006</b>              | Small         | 26880 | 0.0             | 0.0         | 0                 |
| <b>Schneiders Vortex</b>              | Vortex        | 21027 | 0.0             | 0.0         | 0                 |
| <b>Vacuum pump</b>                    | Pump          | 26881 | 0.0             | 0.0         | 0                 |
| <b>Freezer + coldtrap + speedvac.</b> | Freezer       | 29516 | 0.0             | 0.0         | 0                 |
| <b>Sum</b>                            |               |       | <b>3468 kWh</b> | <b>100%</b> | <b>31 645 kWh</b> |



### 2.7.3.6 Computer screens

**Table S39:** Power consumption measurements on a computer screen with different brightness levels. *The following data has been acquired through R. Pollice and T. Freese and is being published with permission of the Faculty of Science and Engineering, University of Groningen.*

| Power (W) | Brightness | Energy per day (kWh) | Price per day (€) | Energy per day for 1000 screens (kWh) | Price per day for 1000 screens (€) | Energy per day for 10 000 screens (kWh) | Price per day for 10 000 screens (€) |
|-----------|------------|----------------------|-------------------|---------------------------------------|------------------------------------|-----------------------------------------|--------------------------------------|
| 13.5      | 0          | 0.108                | 0.03              | 108                                   | 32.4                               | 1080                                    | 324                                  |
| 17.3      | 25         | 0.138                | 0.04              | 138.4                                 | 41.52                              | 1384                                    | 415.2                                |
| 21.4      | 50         | 0.171                | 0.05              | 171.2                                 | 51.36                              | 1712                                    | 513.6                                |
| 25.7      | 75         | 0.206                | 0.06              | 205.6                                 | 61.68                              | 2056                                    | 616.8                                |
| 30.4      | 100        | 0.243                | 0.07              | 243.2                                 | 72.96                              | 2432                                    | 729.6                                |

As the University of Groningen has 6390 employees, it can be assumed that at least 6390 computer screens exist in the office spaces (probably more due to multiple screens). If all employees would reduce their screen brightness from 100% to 75% the UG would save 23 324 € annually while consuming 86 297 kWh less energy (equivalent to the annual energy consumption of 27-35 Dutch households, where one average household consumes 2500 - 3200 kWh per year: <https://www.cbs.nl/en-gb/figures/detail/81528ENG>).

**Table S40:** Power consumption and costs of all (single) computer screens (i.e. monitor) for 6390 employees at the UG. Correlation and costs savings are depicted for various brightness levels.

| UG consumption for 6390 screens                       |            |                      |                       |                   |                    |
|-------------------------------------------------------|------------|----------------------|-----------------------|-------------------|--------------------|
| power [W]                                             | brightness | energy per day [kWh] | energy per year (kWh) | Price per day (€) | Price per year (€) |
| 13.5                                                  | 0          | 690.12               | 251 894               | 191.7             | 69 971             |
| 17.3                                                  | 25         | 881.82               | 321 864               | 255.6             | 93 294             |
| 21.4                                                  | 50         | 1092.69              | 398 832               | 319.5             | 116 618            |
| 25.7                                                  | 75         | 1316.34              | 480 464               | 383.4             | 139 941            |
| 30.4                                                  | 100        | 1552.77              | 566 761               | 447.3             | 163 265            |
| <b>Annual savings for brightness from 100 to 75%.</b> |            |                      | <b>86 297 (kWh)</b>   |                   | <b>23 324 €</b>    |

## 2.7.4 Winter break closure 2022-2023 at FSE

The following data has been acquired through R.J.W. Visser and is being published with permission of the Faculty of Science and Engineering, University of Groningen.

For financial and environmental reasons, the buildings of FSE were closed for two weeks during the Christmas period 2022-2023. From Friday 23-12-2022 till Monday 9-1-2023 the buildings of the faculty were in ‘weekend’- mode and only accessible with permission. Furthermore, all personnel were asked to postpone experiments, switch off equipment, close curtains etc. to reduce energy consumption.

In the following sections the energy consumption during this last Christmas period is compared to the energy consumption over the previous four winter break periods. Our main focus is the difference of the “total” closure compared to an “normal” Christmas holiday period (2018-2021) where a lot of people take two weeks off due to vacation, but when the buildings and research operate more or less normally.

As Christmas is on fixed dates differences due to it being in a weekend or in the middle of the week could be observed. In **Figure S23** is depicted how the two-week periods to compare in relation to the dates of the holidays.

|                                  |                                  |                                  |                                  |                                  |                                  |
|----------------------------------|----------------------------------|----------------------------------|----------------------------------|----------------------------------|----------------------------------|
| vrijdag 21 december 2018         | vrijdag 20 december 2019         | vrijdag 18 december 2020         | vrijdag 17 december 2021         | vrijdag 16 december 2022         | vrijdag 15 december 2023         |
| <b>zaterdag 22 december 2018</b> | <b>zaterdag 21 december 2019</b> | <b>zaterdag 19 december 2020</b> | <b>zaterdag 18 december 2021</b> | <b>zaterdag 17 december 2022</b> | <b>zaterdag 16 december 2023</b> |
| zondag 23 december 2018          | zondag 22 december 2019          | zondag 20 december 2020          | zondag 19 december 2021          | zondag 18 december 2022          | zondag 17 december 2023          |
| maandag 24 december 2018         | maandag 23 december 2019         | maandag 21 december 2020         | maandag 20 december 2021         | maandag 19 december 2022         | maandag 18 december 2023         |
| dinsdag 25 december 2018         | dinsdag 24 december 2019         | dinsdag 22 december 2020         | dinsdag 21 december 2021         | dinsdag 20 december 2022         | dinsdag 19 december 2023         |
| woensdag 26 december 2018        | woensdag 25 december 2019        | woensdag 23 december 2020        | woensdag 22 december 2021        | woensdag 21 december 2022        | woensdag 20 december 2023        |
| donderdag 27 december 2018       | donderdag 26 december 2019       | donderdag 24 december 2020       | donderdag 23 december 2021       | donderdag 22 december 2022       | donderdag 21 december 2023       |
| vrijdag 28 december 2018         | vrijdag 27 december 2019         | vrijdag 25 december 2020         | vrijdag 24 december 2021         | vrijdag 23 december 2022         | vrijdag 22 december 2023         |
| <b>zaterdag 29 december 2018</b> | <b>zaterdag 28 december 2019</b> | <b>zaterdag 26 december 2020</b> | <b>zaterdag 25 december 2021</b> | <b>zaterdag 24 december 2022</b> | <b>zaterdag 23 december 2023</b> |
| <b>zondag 30 december 2018</b>   | <b>zondag 29 december 2019</b>   | <b>zondag 27 december 2020</b>   | <b>zondag 26 december 2021</b>   | <b>zondag 25 december 2022</b>   | <b>zondag 24 december 2023</b>   |
| maandag 31 december 2018         | maandag 30 december 2019         | maandag 28 december 2020         | maandag 27 december 2021         | maandag 26 december 2022         | maandag 25 december 2023         |
| dinsdag 1 januari 2019           | dinsdag 31 december 2019         | dinsdag 29 december 2020         | dinsdag 28 december 2021         | dinsdag 27 december 2022         | dinsdag 26 december 2023         |
| woensdag 2 januari 2019          | woensdag 1 januari 2020          | woensdag 30 december 2020        | woensdag 29 december 2021        | woensdag 28 december 2022        | woensdag 27 december 2023        |
| donderdag 3 januari 2019         | donderdag 2 januari 2020         | donderdag 31 december 2020       | donderdag 30 december 2021       | donderdag 29 december 2022       | donderdag 28 december 2023       |
| vrijdag 4 januari 2019           | vrijdag 3 januari 2020           | vrijdag 1 januari 2021           | vrijdag 31 december 2021         | vrijdag 30 december 2022         | vrijdag 29 december 2023         |
| <b>zaterdag 5 januari 2019</b>   | <b>zaterdag 4 januari 2020</b>   | <b>zaterdag 2 januari 2021</b>   | <b>zaterdag 1 januari 2022</b>   | <b>zaterdag 31 december 2022</b> | <b>zaterdag 30 december 2023</b> |
| <b>zondag 6 januari 2019</b>     | <b>zondag 5 januari 2020</b>     | <b>zondag 3 januari 2021</b>     | <b>zondag 2 januari 2022</b>     | <b>zondag 1 januari 2023</b>     | <b>zondag 31 december 2023</b>   |
| maandag 7 januari 2019           | maandag 6 januari 2020           | maandag 4 januari 2021           | maandag 3 januari 2022           | maandag 2 januari 2023           | maandag 1 januari 2024           |
| dinsdag 8 januari 2019           | dinsdag 7 januari 2020           | dinsdag 5 januari 2021           | dinsdag 4 januari 2022           | dinsdag 3 januari 2023           | dinsdag 2 januari 2024           |
| woensdag 9 januari 2019          | woensdag 8 januari 2020          | woensdag 6 januari 2021          | woensdag 5 januari 2022          | woensdag 4 januari 2023          | woensdag 3 januari 2024          |
| donderdag 10 januari 2019        | donderdag 9 januari 2020         | donderdag 7 januari 2021         | donderdag 6 januari 2022         | donderdag 5 januari 2023         | donderdag 4 januari 2024         |
| vrijdag 11 januari 2019          | vrijdag 10 januari 2020          | vrijdag 8 januari 2021           | vrijdag 7 januari 2022           | vrijdag 6 januari 2023           | vrijdag 5 januari 2024           |
| <b>zaterdag 12 januari 2019</b>  | <b>zaterdag 11 januari 2020</b>  | <b>zaterdag 9 januari 2021</b>   | <b>zaterdag 8 januari 2022</b>   | <b>zaterdag 7 januari 2023</b>   | <b>zaterdag 6 januari 2024</b>   |
| <b>zondag 13 januari 2019</b>    | <b>zondag 12 januari 2020</b>    | <b>zondag 10 januari 2021</b>    | <b>zondag 9 januari 2022</b>     | <b>zondag 8 januari 2023</b>     | <b>zondag 7 januari 2024</b>     |

Figure S23: Time period calculations of two weeks winter break period.

Below, the summarized data is presented for the four main buildings of FSE, Nijenborg 4 (NB), Energy Academy (EA), Bernoulliborg (BB), and Linneausborg (LB) as for FSE total which also includes some smaller buildings.

### Specifications of winter break:

#### Laboratories:

Temperature within *generally climate-controlled* laboratories will be reduced to a technically minimal and responsible level. Ventilation is not being adjusted.

Ventilation and room temperature of *specifically climate-controlled* areas, such as climate cells, laser laboratories, animal facilities etc. remain unchanged.

#### Offices:

Ventilation and the room temperature in offices will be reduced to a technically minimal and responsible level.

#### Both laboratories and offices:

All staff are requested to switch off all equipment, including computers, that can be safely switched off during the winter holiday closure.

#### Accessibility

If researchers need to access the research spaces, they are advised that accessibility of buildings will be comparable to accessibility during normal weekends.

There will be no company emergency response (BHV) during the holiday closure.

**Table S41:** Electricity, gas and costs savings through winter breaks and closures.

|                                                                           | 5100 NB4 electricity (kWh) | 5100 NB4 gas (m <sup>3</sup> ) | 5158 EA (kWh) | 5161 BB electricity (kWh) | 5171 LB electricity (kWh) | 5171 LB (m <sup>3</sup> ) | FSE total electricity (kWh) | FSE total gas (m <sup>3</sup> ) |
|---------------------------------------------------------------------------|----------------------------|--------------------------------|---------------|---------------------------|---------------------------|---------------------------|-----------------------------|---------------------------------|
| <b>Avg 2018-2021</b>                                                      | 379 362                    | 149 921                        | 59 768        | 74 001                    | 52 3682                   | 9 603                     | 1 019 461                   | 160 489                         |
| <b>2022</b>                                                               | 304 325                    | 92 051                         | 47 119        | 29 036                    | 428 504                   | 10 567                    | 798 977                     | 102 333                         |
| <b>Savings in units (kWh or m<sup>3</sup>)</b>                            | 75 037                     | 57 870                         | 12 649        | 44 965                    | 95 178                    | - 964                     | 220 484                     | 58 156                          |
| <b>Savings financially</b><br>gas m <sup>3</sup> = €2.23<br>kWh = € 0.535 | 40 145 €                   | 129 050 €                      | 6 767 €       | 24 056 €                  | 50 920 €                  | - 2150                    | 117 959 €                   | 129 687 €                       |

Note: Data presented is not corrected for outside air temperatures.

The large percentile and absolute differences in buildings presented can be explained by their age and isolation, but also by their function, such as offices vs. lab facilities or the presence of animal housings which limits the possibility of a ‘total’ closure.

### Arguments for and against a ‘total’ closure during the Christmas period 2023-2024

#### Arguments in favor of ‘total’ closure

- Environmental benefits: The equivalent of the annual use of 60 Dutch households is saved in two weeks.
- Financial benefits: Compared to 2018-2021, FSE saved in 2022-2023 around 250 000 €.
- Awareness: Climate and energy are back on the agenda for staff and students.

#### Arguments against a ‘total’ closure

- Research: A negative effect on research is to be expected since experiments and research are on hold for two weeks.
- Working from home: Some personnel cannot work from home. Our CAO obliges the UG to provide such staff with free leave hours if not provided with a place to work.
- Not a universal holiday: Christmas is not a universal holiday, meaning the UG would expect students and staff to adhere to the Dutch holiday calendar.
- Tenants: Some buildings have tenants, meaning a ‘total’ closure has to be negotiated for those buildings.

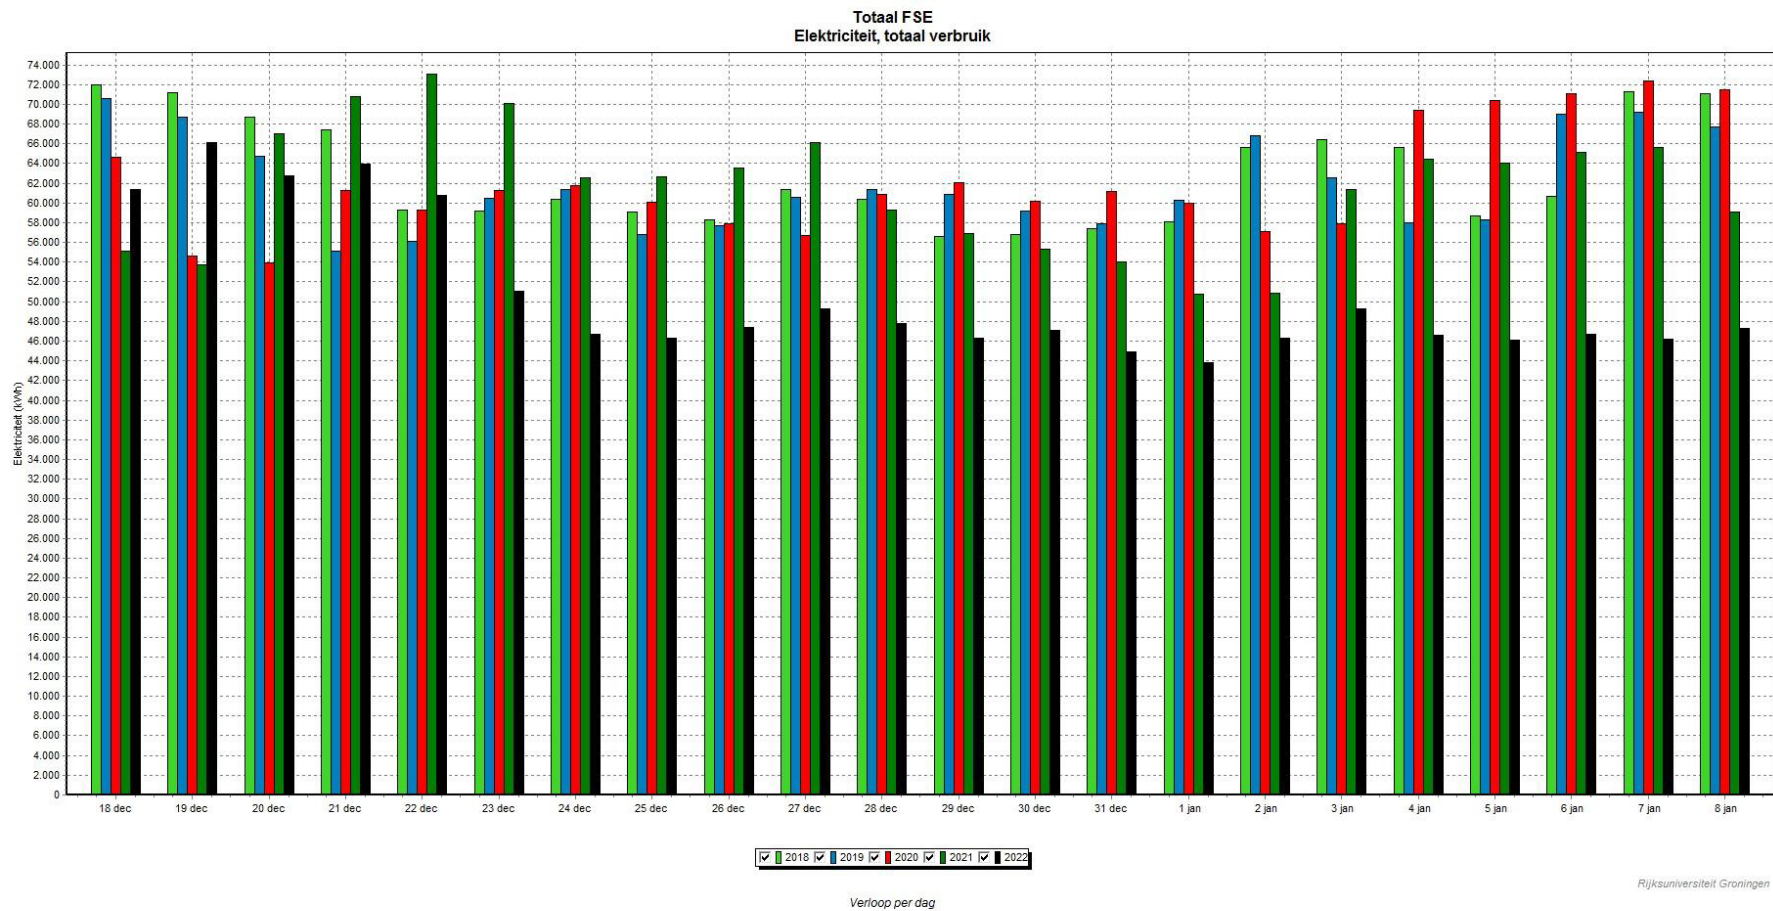

**Figure S24:** Electricity consumption during the winter breaks at FSE from 2018-2022.

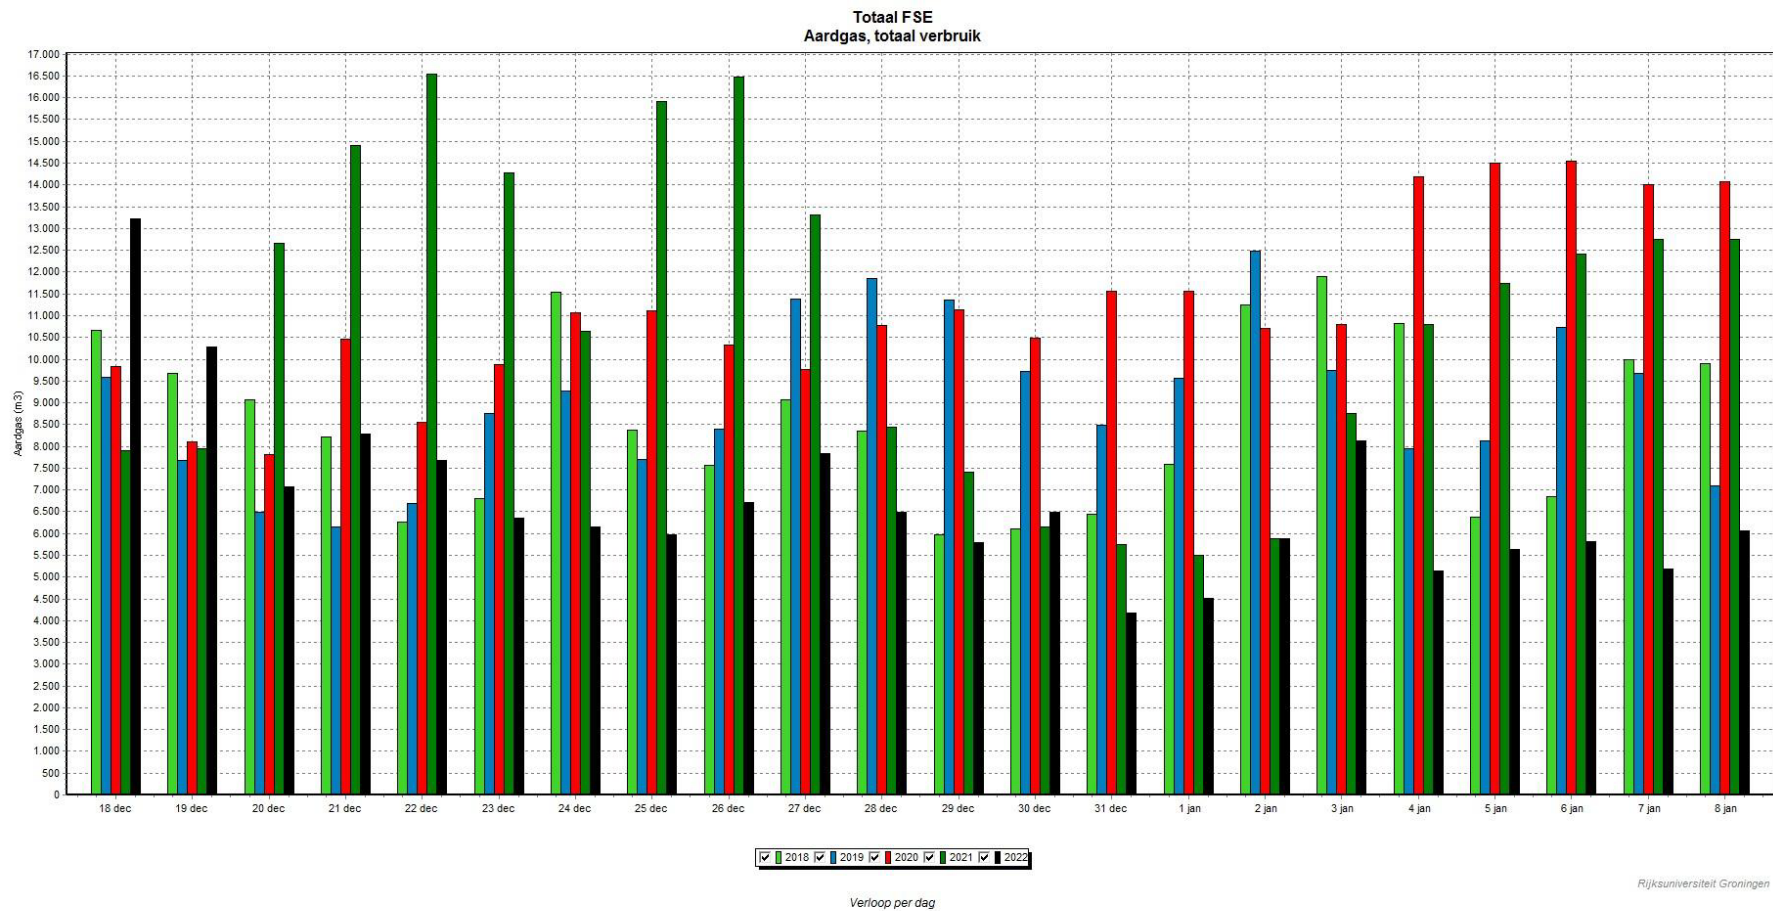

**Figure S25:** Gas consumption during the winter break at FSE from 2018-2022.

## 2.7.5 Travel data of the authors

Table S42: Travel data of B. L. Feringa from January 2022 – July 2023.

| Ben L. Feringa                                         |      |                 |                 |                |                           |                     |
|--------------------------------------------------------|------|-----------------|-----------------|----------------|---------------------------|---------------------|
| # of months                                            | 2022 | from            | to              | via            | remarks                   | CO2e emissions (kg) |
| 1                                                      | jan  | -               | -               | -              | -                         | -                   |
| 2                                                      | feb  | AMS             | Dubai           | -              | 2 way                     | 3440                |
| 3                                                      | mrt  | AMS             | Vienna          | -              | 2 way                     | 632                 |
| 4                                                      | apr  | AMS             | Vienna          | -              | 2 way                     | 632                 |
| 5                                                      | mei  | AMS             | Bordeaux        | -              | 2 way                     | 602                 |
| 6                                                      | jun  | AMS             | Valencia        | -              | 2 way                     | 856                 |
| 6                                                      | jun  | AMS             | Helsinki        | -              | 2 way                     | 882                 |
| 6                                                      | jun  | AMS             | Vienna          | -              | 2 way                     | 632                 |
| 6                                                      | jun  | AMS             | London Heathrow | -              | 2 way                     | 210                 |
| 7                                                      | jul  | AMS             | Warsaw          | -              | 2 way                     | 724                 |
| 8                                                      | aug  | AMS             | Vienna          | -              | 2 way                     | 632                 |
| 9                                                      | sep  | AMS             | Reno, USA       | Salt Lake City | 2 way (both ways via SLC) | 5423                |
| 9                                                      | sep  | Hamburg         | Stockholm       | Copenhagen     | 1 way                     | 323                 |
| 9                                                      | sep  | Stockholm       | AMS             | -              | 1 way                     | 346                 |
| 10                                                     | okt  | AMS             | Boston          | -              | 2 way                     | 2708                |
| 10                                                     | okt  | AMS             | El Paso         | Atlanta        | 2 way (both ways via ATL) | 4928                |
| 11                                                     | nov  | AMS             | Geneve          | -              | 2 way                     | 444                 |
| 12                                                     | dec  | -               | -               | -              | -                         | -                   |
|                                                        | 2023 | from            | to              | via            | remarks                   |                     |
| 13                                                     | jan  | AMS             | Cardiff         | -              | 2 way                     | 442                 |
| 14                                                     | feb  | AMS             | Bordeaux        | -              | 2 way                     | 602                 |
| 15                                                     | mrt  | AMS             | Vienna          | -              | 2 way                     | 632                 |
| 15                                                     | mrt  | AMS             | Londen Stansted |                | back to Eindhoven         | 194                 |
| 16                                                     | apr  | AMS             | Los Angeles     | -              | 1 way                     | 3482                |
| 16                                                     | apr  | LAX             | San Francisco   | -              | 1 way                     | 147                 |
| 16                                                     | apr  | SFO             | AMS             | -              | 1 way                     | 2344                |
| 16                                                     | apr  | AMS             | Washington DC   | -              | 1 way                     | 1805                |
| 16                                                     | apr  | Washington DC   | AMS             | New York       | 1 way                     | 1726                |
| 17                                                     | mei  | AMS             | Tel Aviv        | -              | 2 way                     | 1802                |
| 17                                                     | mei  | AMS             | Milaan Linate   | -              | 1 way                     | 246                 |
| 17                                                     | mei  | Geneve          | AMS             | -              | 1 way                     | 222                 |
| 17                                                     | mei  | AMS             | Gothenburg      | -              | 2 way                     | 526                 |
| 18                                                     | jun  | AMS             | Barcelona       | -              | 1 way                     | 381                 |
| 18                                                     | jun  | Valencia        | AMS             | -              | 1 way                     | 428                 |
| 18                                                     | jun  | AMS             | Copenhagen      | -              | 2 way                     | 408                 |
| 18                                                     | jun  | AMS             | Milaan Linate   | -              | 2 way                     | 492                 |
| 18                                                     | jun  | AMS             | Stockholm       | -              | 2 way                     | 692                 |
| 19                                                     | jul  | AMS             | Madrid          | -              | 2 way                     | 796                 |
| 19                                                     | jul  | AMS             | Rome            | -              | 1 way                     | 373                 |
| 19                                                     | jul  | Rome            | Londen Heathrow | -              | 1 way                     | 367                 |
| 19                                                     | jul  | Londen Heathrow | AMS             | -              | 1 way                     | 105                 |
| <b>Total emissions (kg)</b>                            |      |                 |                 |                |                           | <b>41 626</b>       |
| <b>Total # of flights</b>                              |      |                 |                 |                |                           | <b>67</b>           |
| <b># flights per month</b>                             |      |                 |                 |                |                           | <b>3.53</b>         |
| <b>Emissions per month (kg)</b>                        |      |                 |                 |                |                           | <b>2191</b>         |
| <b># flights per year</b>                              |      |                 |                 |                |                           | <b>42</b>           |
| <b>Emissions per year (kg)</b>                         |      |                 |                 |                |                           | <b>26290</b>        |
| <b>Total CO2e emissions per year (kg)</b>              |      |                 |                 |                |                           | <b>324000</b>       |
| <b>Air travel percentage of total carbon footprint</b> |      |                 |                 |                |                           | <b>8.11%</b>        |

**Table S43:** Travel data of T. Freese, M. Heinemann, and M. M. Lerch from January 2022 – July 2023. N. Elzinga did not take business air travel during this time period.

| <b>Michael M. Lerch</b>                                |               |             |     |         |                     |  |
|--------------------------------------------------------|---------------|-------------|-----|---------|---------------------|--|
| Jan. 2022 - Jul. 2023                                  | from          | to          | via | remarks | CO2e emissions (kg) |  |
| Dec-22                                                 | AMS           | Geneva      | -   | 2 way   | 373                 |  |
| <b>Total emissions (kg)</b>                            |               |             |     |         | <b>373</b>          |  |
| <b>Total # of flights</b>                              |               |             |     |         | <b>2</b>            |  |
| <b># flights per month</b>                             |               |             |     |         | <b>0.11</b>         |  |
| <b>Emissions per month (kg)</b>                        |               |             |     |         | <b>20</b>           |  |
| <b># flights per year</b>                              |               |             |     |         | <b>1</b>            |  |
| <b>Emissions per year (kg)</b>                         |               |             |     |         | <b>236</b>          |  |
| <b>Total CO2e emissions per year (kg)</b>              |               |             |     |         | <b>24000</b>        |  |
| <b>Air travel percentage of total carbon footprint</b> |               |             |     |         | <b>0.98%</b>        |  |
| <b>Matthias Heinemann</b>                              |               |             |     |         |                     |  |
| Jan. 2022 - Jul. 2023                                  | from          | to          | via | remarks | CO2e emissions (kg) |  |
| n/a                                                    | AMS           | Los Angeles | -   | 2 way   | 3056                |  |
| <b>Total emissions (kg)</b>                            |               |             |     |         | <b>3056</b>         |  |
| <b>Total # of flights</b>                              |               |             |     |         | <b>2</b>            |  |
| <b># flights per month</b>                             |               |             |     |         | <b>0.11</b>         |  |
| <b>Emissions per month (kg)</b>                        |               |             |     |         | <b>161</b>          |  |
| <b># flights per year</b>                              |               |             |     |         | <b>1</b>            |  |
| <b>Emissions per year (kg)</b>                         |               |             |     |         | <b>1930</b>         |  |
| <b>Total CO2e emissions per year (kg)</b>              |               |             |     |         | <b>38000</b>        |  |
| <b>Air travel percentage of total carbon footprint</b> |               |             |     |         | <b>5.08%</b>        |  |
| <b>Thomas Freese</b>                                   |               |             |     |         |                     |  |
| Jan. 2022 - Jul. 2023                                  | from          | to          | via | remarks | CO2e emissions (kg) |  |
| Jun-23                                                 | AMS           | Los Angeles | -   | 1 way   | 1528                |  |
| Jul-23                                                 | San Francisco | AMS         | -   | 1way    | 1497                |  |
| <b>Total emissions (kg)</b>                            |               |             |     |         | <b>3025</b>         |  |
| <b>Total # of flights</b>                              |               |             |     |         | <b>2</b>            |  |
| <b># flights per month</b>                             |               |             |     |         | <b>0.11</b>         |  |
| <b>Emissions per month (kg)</b>                        |               |             |     |         | <b>159</b>          |  |
| <b># flights per year</b>                              |               |             |     |         | <b>1</b>            |  |
| <b>Emissions per year (kg)</b>                         |               |             |     |         | <b>1911</b>         |  |
| <b>Total CO2e emissions per year (kg)</b>              |               |             |     |         | <b>21000</b>        |  |
| <b>Air travel percentage of total carbon footprint</b> |               |             |     |         | <b>9.10%</b>        |  |



## 2.7.6 Hazardous waste production at FSE

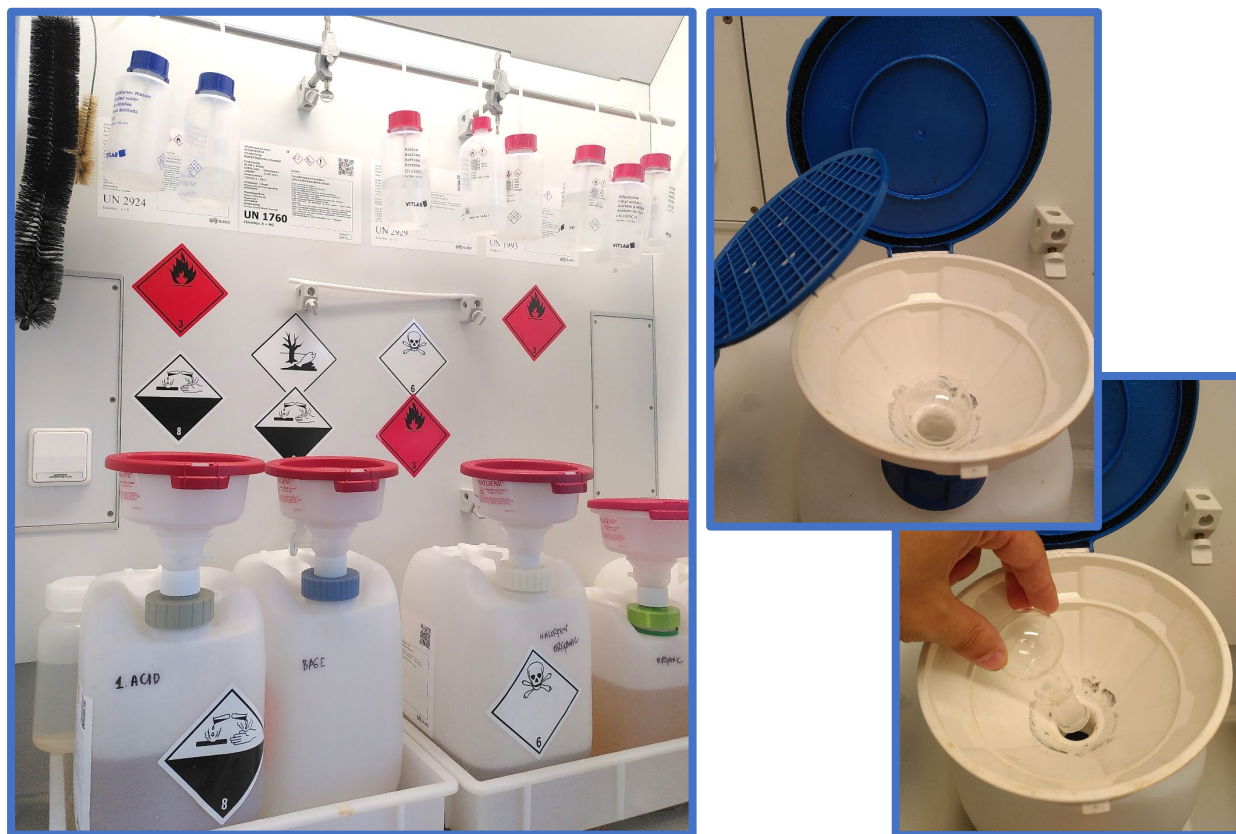

**Figure S26:** Funnels with lid to prevent solvent evaporation from waste canisters (left). Use of a round bottom flask to improve solvent loss by evaporation, which can serve as alternative to funnels with a lid (right). Another alternative to the round bottom flask is the plastic balls used to cover water baths in rotary evaporators, which can also be placed in a funnel to prohibit solvent loss by evaporation. Image reproduced from previously published guidebook (<https://doi.org/10.26434/chemrxiv-2023-q3lmq-v2>).

### 2.7.6.1 Education and student practicals

The following data has been acquired through N.N.H.M. Eisink and is being published with permission of the Faculty of Science and Engineering, University of Groningen.

**Table S44:** Hazardous liquid waste production in 6 months student practical in the academic year September 2021-February 2022, number of Students \* days: 6390. Calculated by N.N.H.M. Eisink, adapted by T. Freese.

| Solvents                     | Amount (L)    | Per student per day (mL) |
|------------------------------|---------------|--------------------------|
| Acetone                      | 1260          | 197.2                    |
| Ethanol (96%)                | 385           | 60.3                     |
| Ethanol (absolute)           | 15            | 2.3                      |
| Diethyl ether                | 201           | 31.5                     |
| Ethylacetate                 | 82            | 12.8                     |
| Methanol                     | 50            | 7.8                      |
| Pentane                      | 175           | 27.4                     |
| Chloroform (D <sub>1</sub> ) | 3.7           | 0.6                      |
| DMSO (D <sub>6</sub> )       | 0.7           | 0.1                      |
| THF                          | 27.5          | 4.3                      |
| <b>Total</b>                 | <b>6596 L</b> | <b>344 mL</b>            |

**Table S45:** Hazardous solid waste production (e.g. plastic waste production) in 6 months student practical in the academic year September 2021 – February 2022, number of Students \* days: 6390. Calculated by N.N.H.M. Eisink, adapted by T. Freese.

| Disposables                      | Amount | Unit     | Individual items per unit | individual item per student per day | Sum   |
|----------------------------------|--------|----------|---------------------------|-------------------------------------|-------|
| Aspirine tubes                   | 69     | Box      | 100                       | 1                                   | 6900  |
| Cuvets, halfmicro, plastic, 1 mL | 59     | Box      | 100                       | 1                                   | 5900  |
| Caps for aspirine tubes          | 92     | Bag      | 100                       | 1                                   | 9200  |
| Eppendorf cups, 1.5 mL           | 30     | Bag      | 500                       | 2                                   | 15000 |
| Eppendorf cups, 2 mL             | 23     | Bag      | 500                       | 2                                   | 11500 |
| Greiner tubes 15 mL              | 10     | Bag      | 50                        | 0.08                                | 500   |
| Greiner tubes 50 mL, skirted     | 22     | Bag      | 25                        | 0.09                                | 550   |
| Greiner tubes 50 mL, unskirted   | 5      | Bag      | 20                        | 0.02                                | 100   |
| Hirschmann ring caps             | 11     | 4 boxes  | 1000                      | 2                                   | 11000 |
| Inj. Syringe, 2-piece, 1 mL      | 28     | Box      | 100                       | 0.4                                 | 2800  |
| Inj. Syringe, 2-piece, 2 mL      | 14     | Box      | 100                       | 0.2                                 | 1400  |
| Inj. Syringe, 2-piece, 20 mL     | 4      | Box      | 100                       | 0.1                                 | 400   |
| Inj. Syringe, 2-piece, 5 mL      | 12     | Box      | 100                       | 0.2                                 | 1200  |
| Neoprene gloves (L)              | 52     | 10 boxes | 1000                      | 8                                   | 52000 |
| Neoprene gloves (M)              | 57     | 11 boxes | 1000                      | 9                                   | 57000 |
| Neoprene gloves (S)              | 25     | 12 boxes | 1000                      | 4                                   | 25000 |
| Neoprene gloves (XL)             | 15     | 13 boxes | 1000                      | 2                                   | 15000 |
| Pasteur pipet 150 mm             | 75     | Box      | 250                       | 3                                   | 18750 |
| Pasteur pipet 230 mm             | 39     | Box      | 250                       | 2                                   | 9750  |
| Pipet tips blue 1 mL             | 21     | Bag      | 1000                      | 3                                   | 21000 |
| Pipet tips clear 5 mL            | 6      | Bag      | 1000                      | 1                                   | 6000  |
| Pipet tips yellow 250 µL         | 18     | Bag      | 1000                      | 3                                   | 18000 |
| Test tubes 100 x 16 mm           | 32     | box      | 100                       | 1                                   | 3200  |
| Test tubes 160 x 16 mm           | 75     | box      | 100                       | 1                                   | 7500  |

## 2.7.6.2 Plastic waste production Heinemann group in 2022

The following data has been acquired through S. R. Bonsing-Vedelaar and is being published with permission of the Faculty of Science and Engineering, University of Groningen.

**Table S46:** Plastic waste production in a molecular biology research group in 2022. Calculated by S. R. Bonsing-Vedelaar, adapted by T. Freese.

| Currently used                                         |                   |                                                                                                                                             |                 |                  | Orders 2022        | Unit                    | Amount    | Total Amount  | # per researcher per day | Weight per unit | Total weight  | Total weight Plastics only |
|--------------------------------------------------------|-------------------|---------------------------------------------------------------------------------------------------------------------------------------------|-----------------|------------------|--------------------|-------------------------|-----------|---------------|--------------------------|-----------------|---------------|----------------------------|
| Supplier                                               | Cat. No.          | Description                                                                                                                                 | Price per unit  | LCA score & type |                    |                         |           |               |                          | weight (g)      |               |                            |
| WR                                                     |                   | Gloves, buy neoprene                                                                                                                        | € 0.30 / glove  | unknown          | 43 boxes           | 1000                    | 43        | 43000         | 7                        | 735             | 31605         |                            |
| Sarstedt                                               | 95.953            | Viltstr. waterproof, blauw                                                                                                                  | € 0.73 / marker | unknown          |                    |                         |           |               |                          |                 |               |                            |
| CBN                                                    | 26140             | neoTape-labelling tape, 19 mm, colored, 55 m long                                                                                           | € 0.43 / meter  | unknown          | 10                 |                         |           |               |                          | 155             | 1550          |                            |
| Manutan                                                | 9940737           | Hydro-alcoholische gel Tork Premium S1                                                                                                      | € 13.92 / tube  | unknown          |                    |                         |           |               |                          |                 |               |                            |
| WR                                                     | 115-3473          | Tube, 148 ml, Hand Medico®                                                                                                                  | € 8.30 / tube   | unknown          |                    |                         |           |               |                          |                 |               |                            |
| WR                                                     | 115-9220          | Bench Surface Protector                                                                                                                     | € 1.00 / piece  | unknown          |                    |                         |           |               |                          |                 |               |                            |
| WR                                                     | 115-0031          | Cleanroom-schoonmaakdoekje, droog, WR® Spec-Wipe® 3, Polyester/cellulose, wit, Cleanroomklasse: 100/ISO 5, lxb: 229x229 mm, 300 doekjes/zak | € 0.07 / piece  | unknown          | 2                  |                         |           |               |                          | 1056.7          | 2113.4        |                            |
| Sarstedt                                               | 95_64981          | Storage box 9x9                                                                                                                             | € 1.72 / glove  | unknown          | 20                 |                         |           |               |                          | 93.66           | 21120         |                            |
| Fischer scientific                                     | 16594994          | X50 Disposable Face mask PP blue 3-ply Manufacturer Code : 12888004                                                                         | € 0.15 / piece  | unknown          | 5 boxes            |                         |           |               |                          | 209/181.7       | 1045          |                            |
| Sarstedt                                               | 86_1252001        | Pipet, 2 ml individueel verpakt                                                                                                             | € 0.06 / pipet  | unknown          | 1x500              | 500                     | 2         | 1000          |                          | 463.13          | 2315.65       | 2315.65                    |
| Sarstedt                                               | 86_1253001        | Pipet, 5 ml individueel verpakt                                                                                                             | € 0.08 / pipet  | unknown          | 2x500              | 500                     | 2         | 1000          |                          | 4200            | 8400          | 8400                       |
| Sarstedt                                               | 86_1254001        | Pipet, 10 ml individueel verpakt                                                                                                            | € 0.10 / pipet  | unknown          | 2x500              | 200                     | 6         | 1200          |                          | 5350            | 10700         | 10700                      |
| Sarstedt                                               | 86_1865001        | Pipet, 25ml individueel verpakt                                                                                                             | € 0.16 / pipet  | unknown          | 6x200              | 100                     | 9         | 900           |                          | 3360            | 20160         | 20160                      |
| Sarstedt                                               | 86_1255000        | Pipet, 50 ml individueel verpakt                                                                                                            | € 0.48 / pipet  | unknown          | 9x100              | 1000                    | 1         | 1000          |                          | 1900            | 17100         | 17100                      |
| <b>Sum</b>                                             |                   | <b>Pipettes</b>                                                                                                                             |                 |                  |                    | <b>Sum Pipettes</b>     |           | <b>5100</b>   | <b>0.8</b>               |                 |               |                            |
| Sarstedt                                               | 1562010           | Inoculation Loops (10ul, blue, sterile)                                                                                                     | € 0.03 / piece  | unknown          | 1x1000             | 1000                    | 5         | 5000          |                          | 14.73           | 1473          | 1473                       |
| Sarstedt                                               | 1567010           | entloog, ful wit per 10                                                                                                                     | € 0.03 / piece  | unknown          | 5x1000             | 1000                    | 5         | 5000          |                          | 14.76           | 7380          | 7380                       |
| Boomlab                                                | 38748545          | Spuiten 50 ml, PP, Luer-Lock 3-delig, steriel (38748545)                                                                                    | € 0.69 / piece  | unknown          | 2x50st             | 50                      | 2         | 100           |                          | 35.09           | 350.9         | 350.9                      |
| WR                                                     | TERUSS30-L1M      | Injectiespuit, medisch, PP, Steriel, Without needle, Luer lock tip, Inhoud: 30 ml, VPE: 25                                                  | € 0.61 / piece  | unknown          | 2x25               | 25                      | 2         | 50            |                          | 23.22           | 1161          | 1161                       |
| WR                                                     | 613-5402          | Syringes, Terumo, Sterile, no needle, excentric LT end, 20 ml                                                                               | € 0.12 / piece  | unknown          | 10 syringes?       |                         |           |               |                          | 12.88           | 128.8         | 128.8                      |
| WR                                                     | 613-2317          | Spuilen, Zonder naald, excentrische LT punt, 10ml                                                                                           | € 0.11 / piece  | unknown          | 1x100              | 100                     | 1         | 100           |                          | 7.91            | 791           | 791                        |
| WR                                                     | 613-1599          | Terumo Syringe 5ml without needle                                                                                                           | € 0.11 / piece  | unknown          | 1x100              | 100                     | 1         | 100           |                          | 4.74/4.30       | 474           | 474                        |
| WR                                                     | 613-2001          | Injectiespuit voor de toediening van tuberculine, voor eenmalig gebruik, met schaalverdeling in ml, en luer-sp, 1 ml                        | € 0.15 / piece  | unknown          | 1x100              | 100                     | 1         | 100           |                          |                 |               |                            |
| Sarstedt                                               | 82_1473001        | petrischaal 92x16mm nok ster.                                                                                                               | € 0.06 / piece  | unknown          | 6x480              | 480                     | 6         | 2880          |                          | 7150            | 42900         | 42900                      |
| Isoген/Sarlab                                          | S1110-3000-C      | TipOne® Pipette Tip, 10/20µl XL, Graduated, Bulk                                                                                            | € 0.02 / piece  | unknown          | 1x9600             | 9600                    | 1         | 9600          |                          | 110.07          | 11007         | 11007                      |
| Isoген/Sarlab                                          | S1113-1000-C      | TipOne® Pipette Tip 200µl UltraPoint, Graduated, Bulk                                                                                       | € 0.01 / piece  | unknown          | 6x9600             | 9600                    | 6         | 57600         |                          | 543.78          | 32626.8       | 32626.8                    |
| Isoген/Sarlab                                          | S1111-6000-C      | TipOne® Pipette Tip 1000µl, Graduated, Bulk                                                                                                 | € 0.01 / piece  | unknown          | 5x9600             | 9600                    | 5         | 48000         |                          | 886.09          | 44304.5       | 44304.5                    |
| Isoген/Sarlab                                          | S1111-3200-C      | TipOne® Pipette Tip, 10µl Graduated, Stick Rack                                                                                             | € 0.03 / piece  | unknown          | 3x9600             | 9600                    | 3         | 28800         |                          | 399.6           | 11998         | 11998                      |
| <b>Sum</b>                                             |                   | <b>Pipette tips</b>                                                                                                                         |                 |                  |                    | <b>Sum Pipette tips</b> |           | <b>144000</b> | <b>23</b>                |                 |               |                            |
| Isoген/Sarlab                                          | I1022-0600        | Gel Saver II Tip 1-200µl 204 Rack                                                                                                           | € 0.09 / piece  | unknown          | 3x 96              | 96                      | 3         | 288           |                          | 132             | 396           | 396                        |
| WR                                                     | 231-0106          | Microspatula, Single use                                                                                                                    | € 0.14 / piece  | unknown          | 2x300              | 300                     | 2         | 600           |                          | 135             | 270           | 270                        |
| WR                                                     | 231-0416          | Eco-spatels voor eenmalig gebruik, biologisch afbreekbaar (Eco-Pure®aditief)                                                                | € 0.17 / piece  | unknown          | 2x300              | 300                     | 2         | 600           |                          | 215             | 430           | 430                        |
| WR                                                     | 231-0105          | Spatula big, Single use.                                                                                                                    | € 0.37 / piece  | unknown          | 2x150              | 150                     | 2         | 300           |                          | 440             | 880           | 880                        |
| WR                                                     | 516-0318          | Weigh paper, single use, 100x100 mm                                                                                                         | € 0.02 / piece  | unknown          | 1x500              |                         |           |               |                          | 250             | 250           |                            |
| WR                                                     | 611-9181          | LLG weegbakjes 7 ml, PS zwart 46x46x8 mm, antistatisch                                                                                      | € 0.06 / piece  | unknown          | 2x500              | 500                     | 2         | 1000          |                          | 345             | 690           | 690                        |
| WR                                                     | 611-9182          | LLG weegbakjes 100ml PS zwart 85x85x24 mm, antistatisch                                                                                     | € 0.11 / piece  | unknown          | 2x500              | 500                     | 2         | 1000          |                          | 1140            | 2280          | 2280                       |
| WR                                                     | 611-9180          | LLG weegbakjes 250ml PS zwart 140x140x22 mm, antistatisch                                                                                   | € 0.29 / piece  | unknown          | 2x500              | 500                     | 2         | 1000          |                          | 3150            | 6300          | 6300                       |
| Boomlab                                                | 19045011          | Scalpelmesjes fig.11                                                                                                                        | € 0.37 / piece  | unknown          | 2 packages         |                         |           |               |                          | 170             | 340           |                            |
| WR                                                     | 233-5487          | Scalpel blades, Roesnrij staal, Steriel, nr. 24                                                                                             | € 0.57 / piece  | unknown          | 1 package          |                         |           |               |                          | 1.76            | 1.76          |                            |
| WR                                                     | 514-0030          | Bottle-top filter for 45 mm bottles, 0.2um                                                                                                  | € 8.34 / piece  | unknown          | 25x12              | 12                      | 25        | 300           |                          | 8125            | 20325         | 20325                      |
| WR                                                     | 514-8020          | Syringe filters, Puradisc™, Whatman™, PES, 0.2 µm, 25 mm                                                                                    | € 2.05 / piece  | unknown          | 4x50               | 50                      | 4         | 200           |                          | 210             | 840           | 840                        |
| WR                                                     | 514-0570          | Membranefilters Whatman, Nylon, For Biomass                                                                                                 | € 1.40 / piece  | unknown          | 2x100              | 100                     | 2         | 200           |                          |                 |               |                            |
| Sarstedt                                               | 62 544002         | buis 15ml 120x17mm rode schrd st                                                                                                            | € 0.10 / piece  | unknown          | 3x500              | 500                     | 3         | 1500          |                          | 3500            | 10500         | 10500                      |
| Greiner                                                | 188261            | CELLSTAR®, tube, V, PP, 15ml, label, cap                                                                                                    | € 0.20 / piece  | unknown          | 3x1000             | 1000                    | 3         | 3000          |                          | 6400            | 19200         | 19200                      |
| Sarstedt                                               | 62 548004         | Buis 50ml 114x28mm PP rode dop, conisch                                                                                                     | € 0.09 / piece  | unknown          | 2x300              | 300                     | 2         | 600           |                          | 4020            | 8040          | 8040                       |
| Sarstedt                                               | 62 559001         | buis 50ml 115x28mm pp sterilitat v (self standing)                                                                                          | € 0.12 / piece  | unknown          | 2x300              | 300                     | 2         | 600           |                          | 4020            | 8040          | 8040                       |
| Greiner                                                | 187262            | TUBE, 14ML, PP, ROUND BOTTOM, 12 X 95 MM                                                                                                    | € 0.13 / piece  | unknown          | 3x500              | 500                     | 3         | 1500          |                          | 6.07            | 9105          | 9105                       |
| Sarstedt                                               | 72 704            | Reactivaatje 0.5ml safe-seal met brede rand + aanh. dop                                                                                     | € 0.02 / piece  | unknown          | bag with 100 tubes | 100                     | 1         | 100           |                          | 268.4           | 268.4         | 268.4                      |
| Sarstedt                                               | 72 70400X         | Reactivaatje 0.5ml safe-seal brede rand, kleur                                                                                              | € 0.03 / piece  | unknown          |                    |                         |           |               |                          | 268.42 ?        |               |                            |
| Sarstedt                                               | 72 706            | Reactivaatje 1.5ml safe-seal 39x10, 8mm pp                                                                                                  | € 0.01 / piece  | unknown          | 6x2000             | 2000                    | 6         | 12000         |                          | 2500            | 15000         | 15000                      |
| Sarstedt                                               | 72 70600X         | Reactivaatje 1.5ml safe-seal brede rand-nok kleur                                                                                           | € 0.02 / piece  | unknown          | 4x2000             | 2000                    | 4         | 8000          |                          | 2500            | 10000         | 10000                      |
| Sarstedt                                               | 72 895500         | Reactivaatje 2ml pp safe-seal neutraal                                                                                                      | € 0.02 / piece  | unknown          | 1x2000             | 2000                    | 1         | 2000          |                          | 2640            | 2640          | 2640                       |
| Sarstedt                                               | 72 89500X         | buisje 2ml pp safe-seal kleur                                                                                                               | € 0.02 / piece  | unknown          | 1x2000             | 2000                    | 1         | 2000          |                          | 291.71          | 2333.68       | 2333.68                    |
| Sarstedt                                               | 72 7379           | CryoPure buis 2ml ext. schrd. wit                                                                                                           | € 0.11 / piece  | unknown          | 1100 tubes         | 1100                    | 1         | 1100          |                          | 104.97          | 2309.34       | 2309.34                    |
| Sarstedt                                               | 72 737002         | pcr-cup 0.2ml niet steriel                                                                                                                  | € 0.02 / piece  | unknown          | 3x2000             | 2000                    | 3         | 6000          |                          | 98.23           | 294.69        | 294.69                     |
| Sarstedt                                               | 72 791002         | PCR-strip v3, PCR-PT                                                                                                                        | € 0.28 / strip  | unknown          | 1x2000             | 2000                    | 1         | 2000          |                          | 188.27          | 188.27        | 188.27                     |
| Sarstedt                                               | 72 1978202        | PCR pp plaat 96well, 0.3ml zrand 25zak                                                                                                      | € 2.19 / piece  | unknown          | 1x25               | 25                      | 1         | 25            |                          | 1046            | 1046          | 1046                       |
| Sarstedt                                               | 82_1581           | Microtestplate 96 well, F                                                                                                                   | € 0.25 / piece  | unknown          | 1x100              | 100                     | 1         | 100           |                          | 4170            | 4170          | 4170                       |
| Sarstedt                                               | 82_1972002        | Megablock square wells 2.2 ml PP                                                                                                            | € 2.61 / piece  | unknown          |                    |                         |           |               |                          | 391.18          |               |                            |
| Sarstedt                                               | 82 1581120        | ELISA plate black Med.Bind., F                                                                                                              | € 1.65 / piece  | unknown          |                    |                         |           |               |                          | 1034.68         |               |                            |
| Sarstedt                                               | 82_1584           | Lid for Microtest Plate                                                                                                                     | € 0.19 / piece  | unknown          | 1x100              | 100                     | 1         | 100           |                          | 1460            | 1460          | 1460                       |
| Wetern met Merken B                                    | ISO N KOMBI S/NEN | Glasheidere snelle 2-componenten epox                                                                                                       | € 9.95 / piece  | unknown          |                    |                         |           |               |                          | 188.27          | 188.27        | 188.27                     |
| Intechn Laboratories                                   | SP2012            | Stainless steel catheter pilot, 20ga x 12mm, non-sterile                                                                                    | € 0.55 / piece  | unknown          |                    |                         |           |               |                          | 16.02           | 16.02         | 16.02                      |
| DiversifiedBiotech                                     | TTLW-1000         | Tough-tape for 1.5-2.0ml tubes                                                                                                              | € 23.00 / piece | unknown          |                    |                         |           |               |                          |                 |               |                            |
| WR                                                     | 631-1550          | Objectjlaasje met gesneden randen en normaal uiteinde                                                                                       | € 0.04 / piece  | unknown          |                    |                         |           |               |                          | 77.44           | 1548.8        |                            |
| CBN                                                    | 1121226245        | Erlenmeyer, 100ml, WM                                                                                                                       | € 1.45 / piece  | unknown          | 20                 | 20                      |           |               |                          | 178.6           | 3572          |                            |
| CBN                                                    | 1121216445        | Erlenmeyer, 500ml, NM                                                                                                                       | € 1.75 / piece  | unknown          | 20                 | 20                      |           |               |                          | 210             | 1890          |                            |
| Stores                                                 |                   | Aluminium foil                                                                                                                              |                 |                  | 9x                 | 9                       |           |               |                          | 115             | 1495          |                            |
| Stores                                                 |                   | Autoclave tape                                                                                                                              |                 |                  | 13x                | 13                      |           |               |                          |                 |               |                            |
| <b>Stores</b>                                          |                   | <b>Cuvettes</b>                                                                                                                             |                 |                  | <b>23boxes</b>     | <b>100</b>              | <b>23</b> | <b>2300</b>   | <b>0.4</b>               | <b>270</b>      | <b>6210</b>   | <b>6210</b>                |
| Stores                                                 |                   | Matches                                                                                                                                     |                 |                  | 9x                 | 9                       |           |               |                          | 80              | 720           |                            |
| Stores                                                 |                   | Paper towels                                                                                                                                |                 |                  | 11x6               | 11                      | 6         | 66            |                          | 7000            | 77000         |                            |
| Stores                                                 |                   | Parafilm                                                                                                                                    |                 |                  | 2x                 | 2                       | 1         | 2             |                          | 660             | 1320          | 1320                       |
| Stores                                                 |                   | Pasteur pipettes                                                                                                                            |                 |                  | 1x250              | 250                     | 1         | 250           |                          | 752.91          |               |                            |
| <b>TOTAL (g)</b>                                       |                   |                                                                                                                                             |                 |                  |                    |                         |           |               |                          |                 | <b>677825</b> | <b>532681</b>              |
| <b>TOTAL (kg)</b>                                      |                   |                                                                                                                                             |                 |                  |                    |                         |           |               |                          |                 | <b>678</b>    | <b>533</b>                 |
| <b>TOTAL (kg) per person per month, 17 researchers</b> |                   |                                                                                                                                             |                 |                  |                    |                         |           |               |                          |                 | <b>3.3</b>    | <b>2.6</b>                 |
| <b>TOTAL (kg) per person per year, 17 researchers</b>  |                   |                                                                                                                                             |                 |                  |                    |                         |           |               |                          |                 | <b>39.9</b>   | <b>31.3</b>                |

### 2.7.6.3 Autoclaving experiment of plastic syringes for reuse

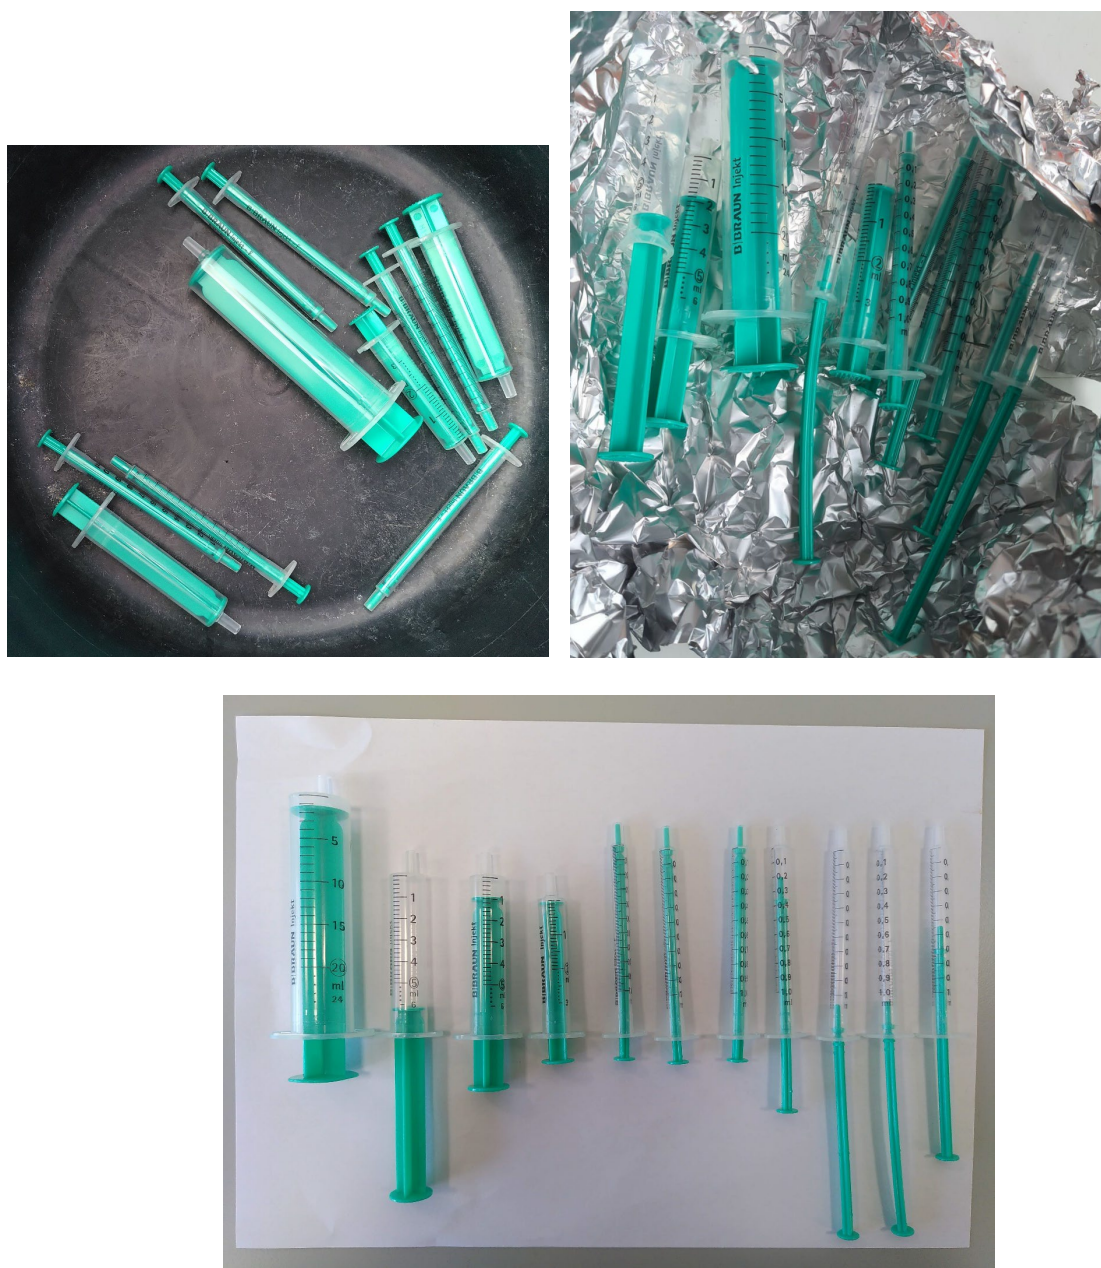

**Figure S27:** Syringes before (top left) and after (top right and bottom) autoclaving for reuse in a chemistry laboratory. Stains and remaining water droplets led to unfeasibility.



## 2.7.7 Marketplace for second-hand laboratory equipment

### Website

In the menu on the left hand side of this page: <https://myuniversity.rug.nl/infonet/medewerkers/fse/fse-research/green-labs/>

Old lab equipment is often stored somewhere in the lab for a long time. This equipment is sometimes donated to colleagues, but too often they are only taking up space in the lab to only be thrown out years later. This is a pity because selling this equipment frees up space in your lab and will financially benefit your lab group. To facilitate this, you can use [Labmakelaar.com](https://www.labmakelaar.com), a Benelux-based second-hand equipment trader.

### Three options

[Labmakelaar.com provides three ways of selling your equipment.](#)

The first, concerning a direct purchase by Labmakelaar.com, is the easiest. You provide all the information necessary, and Labmakelaar.com gives you their quotation for buying it. This money will be transferred to your project code directly.

The second method is to have Labmakelaar.com sell it for you 'in consignment'. This means that the equipment is still in your possession, but that Labmakelaar will take care of all practicalities. They will make sure the item is correctly calibrated, is functioning properly, and will transport it to the eventual buyer. You are only responsible for sending the piece of equipment to Labmakelaar.com and have to reimburse any reparation costs if it is broken (*i.e.* refurbishing). In the end, you will receive 50% of the eventual amount the object was resold for.

The third method is Labmakelaar facilitating the resell of your piece of equipment, without having it in consignment. This means you are responsible for calibration, repairs, transport, and sending an invoice to Labmakelaar. They will put the item on their website and will process the request by the buyer. Using this method, Labmakelaar is entitled to 21% of the agreed-upon amount but this will result in more work for you.

### The procedure

If you want to make use of either the first or second option, please send Labmakelaar.com an e-mail ([info@labmakelaar.com](mailto:info@labmakelaar.com)) with all the information as it appears in the "product aanmaken" form. In their reply, they will either offer to buy it directly from you or offer to take it into consignment. If you only want Labmakelaar.com to mediate between you and the buyer, you can fill out their form. Please make sure to include your management controller and financial controller in cc, to make sure they know that you intend to sell a certain item. After a certain item is sold and the money received by the university, the sale of that specific piece of equipment will be disinvested. This means that the depreciation will be increased, which will be deducted from the sale price. Hence, the money received by your lab group will in some cases be lower than the amount agreed upon by Labmakelaar.com and you. In all cases, please make sure to read and abide by their [terms and conditions](#).

### Legality

Most lab equipment can be sold without any problems. However, it is important to realize that if a certain piece of equipment was bought using specific project funds, it is not eligible for resale. Of course, if a certain subsidy specifically mentions that the bought equipment is not eligible for resale, this also means that the piece of equipment cannot be sold.

### 2.7.8 Art from laboratory waste

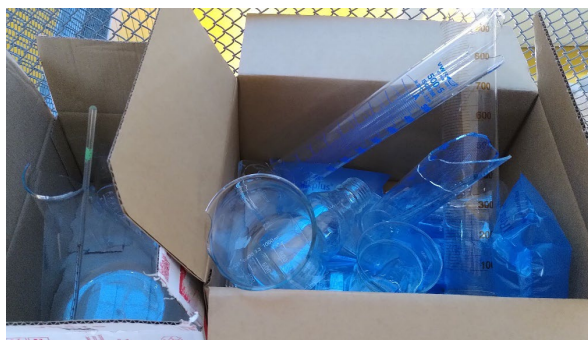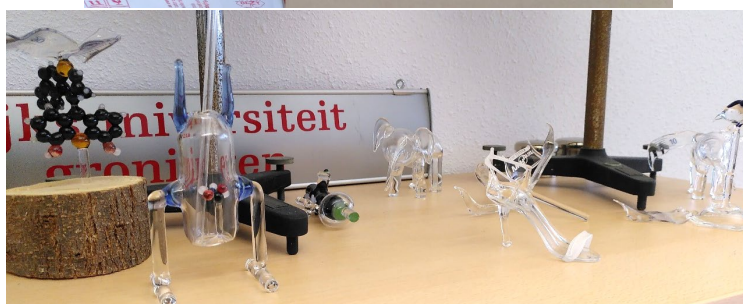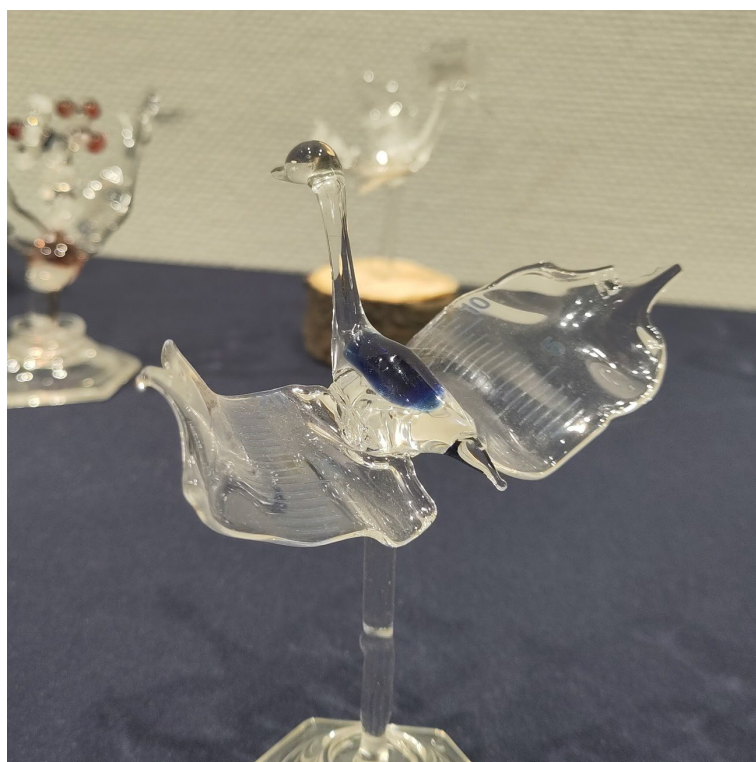

**Figure S28:** Swan and other glass sculpture made from broken glassware.  
*Artist credit: M. C. A. Stuart, University of Groningen.*

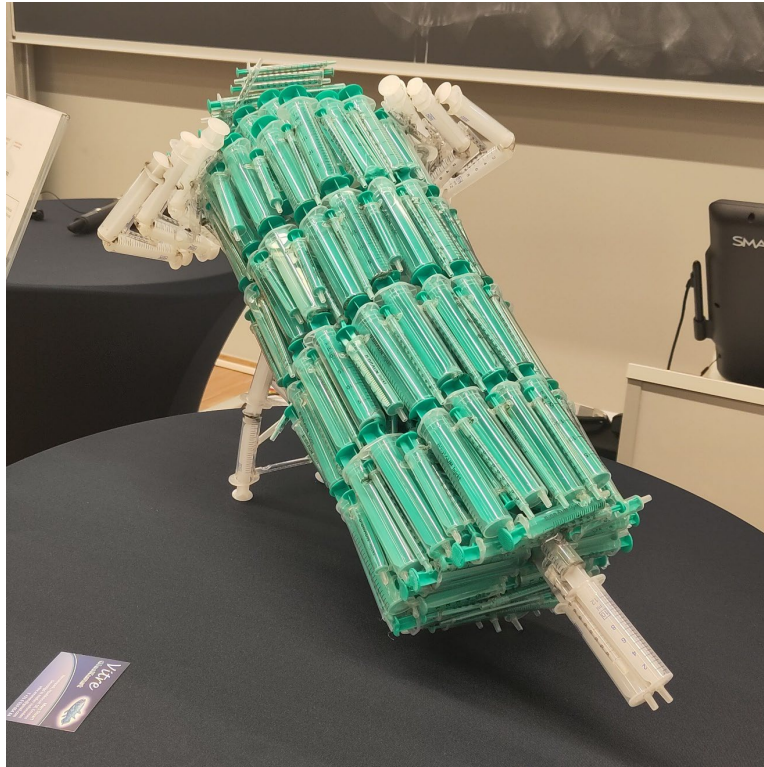

**Figure S29:** Syringe made from syringes plastic waste collected from the pilot laboratory.  
*Artist credit: M. Heinhuis, University of Groningen.*

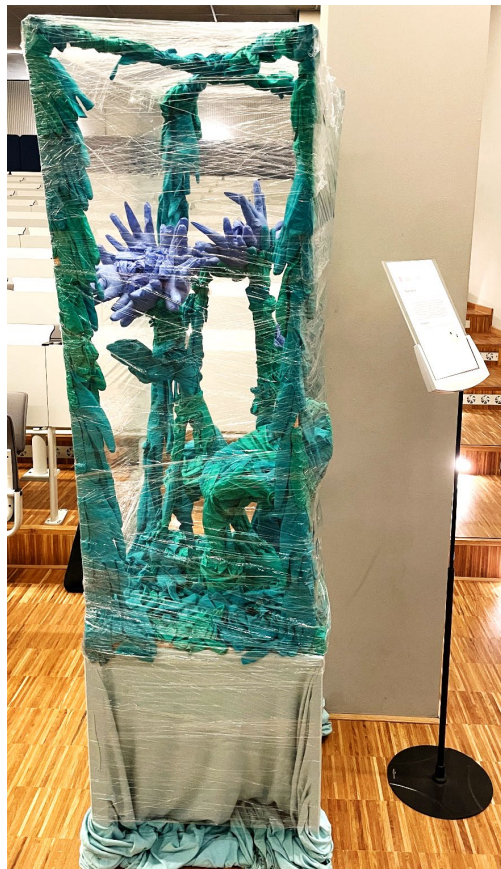

**Figure S30:** Flower art made from glove waste.  
*Artist credit: A. Hallik, University of Groningen.*



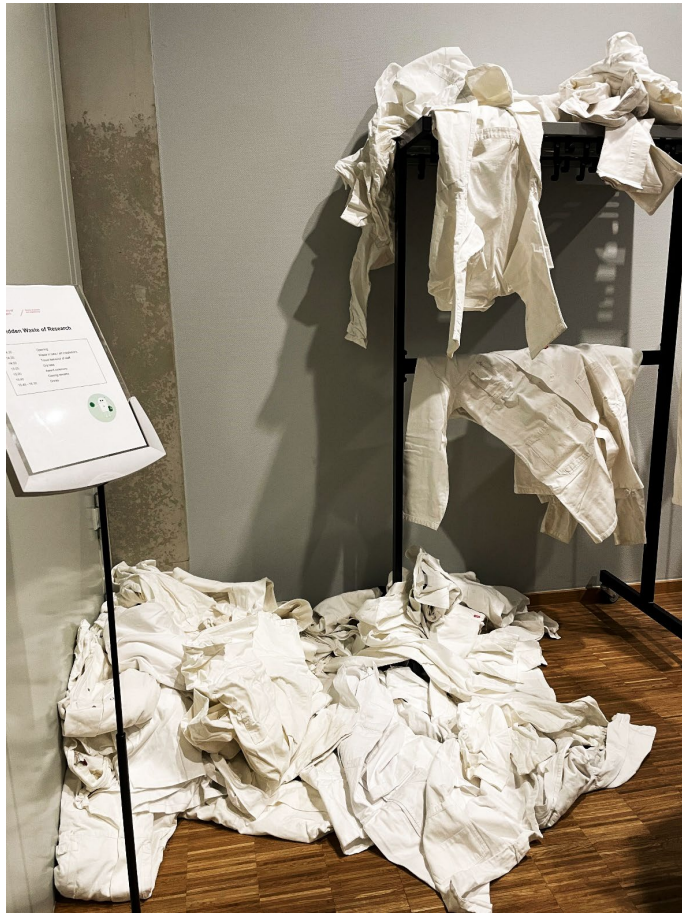

**Figure S31:** Old and forgotten lab coats piling up. *Artist credit: T. Freese & P. Nauw, University of Groningen.*

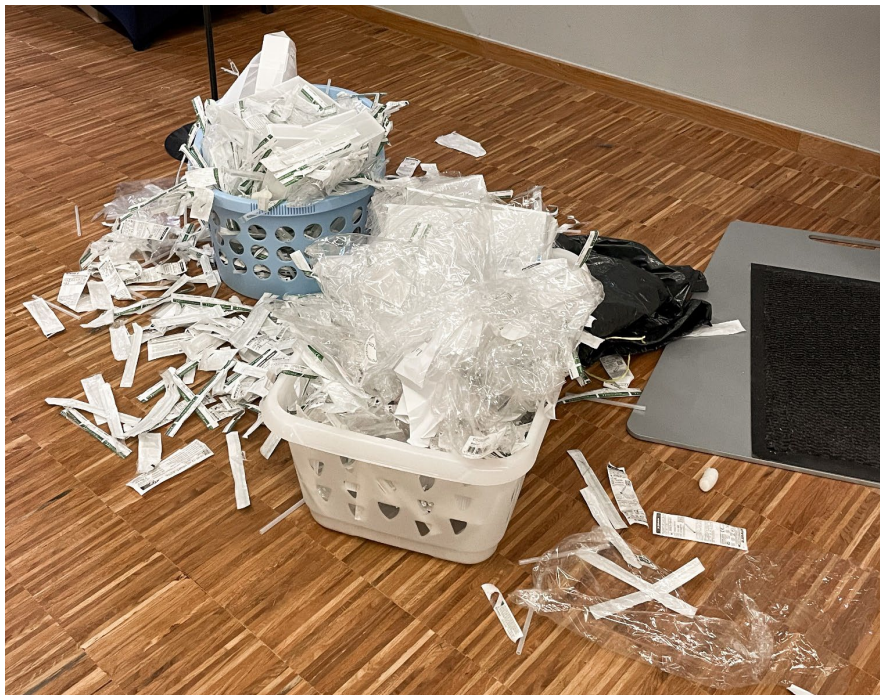

**Figure S32:** Packaging material waste from laboratory single-use consumables. *Artist credit: T. Freese, University of Groningen.*

## 2.7.9 Scope 3 - Furniture CO<sub>2</sub>e calculations at FSE

*The following data has been acquired through G. Boesjes and N. Elzinga and is being published with permission of the Faculty of Science and Engineering, University of Groningen.*

### Method

The carbon footprint of the inventoried furniture at the Faculty of Science and Engineering (FSE) was calculated using the Energy Analysis Program (EAP).<sup>16</sup> This program uses a hybrid method to calculate the environmental impact of a product or service.

This hybrid method consists in part of a Life Cycle Analysis (LCA). In an LCA, a product is described as a system. There raw materials and materials needed for manufacturing of the product, and production methods (preparation, production of materials, transportation, etc.) are included in the analysis. Environmental impacts are calculated for each component.

Furthermore, EAP also uses Input-Output Analysis. This looks at the connections between different industries in the economy, including their environmental impacts. It reveals how transactions between certain industries affect each other. This allows you to determine from a financial transaction (the market price of the product) what - on average - the carbon footprint of that product is.

### Inventory

For each piece of furniture, the following data must be entered into EAP:

1. General information
  - a. Weight (kg).
  - b. Transport weight (kg)
  - c. Price (€)
  - d. VAT rate (%)
2. Production
  - a. Type of manufacturer
3. Materials
  - a. Basic Goods
  - b. Packaging materials
4. Transportation
  - a. Distance by transport type (km).
5. Trade
  - a. Market type.

The weight and price of each product were looked up on websites of sellers of this furniture. Estimates were made where necessary. A VAT rate of 21% was assumed for each product. EAP offers a wide selection of manufacturer types from which to choose. In this analysis, Manufacturer of furniture (code 31 in EAP) was chosen. For each product, the packaging is assumed to be 85% cardboard, 10% Styrofoam (polystyrene) and 5% plastic (LDPE). It is further assumed that each product must be transported on average 200 km by truck, and that the products are traded through furniture wholesalers (wholesale trade furniture, soft furnishings, floor covering).

## Results

The table below depicts the emission factor per furniture item, the total number inventoried, and the total emissions in CO<sub>2</sub> equivalents as calculated in EAP. All the furniture of Nijenborgh 4 correspond to emissions of 1032 tons CO<sub>2</sub>e.

**Table S47:** Furniture inventory and its corresponding carbon impact of NB4 (Stratingh Institute of Chemistry, etc.)

| Furniture                                                    | Type                 | Emission factor (kg CO <sub>2</sub> e) | Amount | Emissions (tons CO <sub>2</sub> e) |
|--------------------------------------------------------------|----------------------|----------------------------------------|--------|------------------------------------|
| Office chair                                                 | -                    | 185                                    | 1718   | 319                                |
| Desk                                                         | -                    | 210                                    | 1155   | 243                                |
| Drawer unit                                                  | <i>Hanging</i>       | 70                                     | 151    | 11                                 |
|                                                              | <i>Standing</i>      | 145                                    | 1114   | 161                                |
| Cupboard                                                     | <i>Blinds high</i>   | 184                                    | 345    | 63                                 |
|                                                              | <i>Blinds middle</i> | 163                                    | 68     | 11                                 |
|                                                              | <i>Blinds low</i>    | 142                                    | 46     | 7                                  |
|                                                              | <i>Archive high</i>  | 140                                    | 111    | 16                                 |
|                                                              | <i>Archive low</i>   | 122                                    | 60     | 7                                  |
| Meeting chair                                                | -                    | 36                                     | 1905   | 69                                 |
| Meeting table                                                | -                    | 181                                    | 690    | 125                                |
| <b>Total</b>                                                 |                      |                                        |        | <b>1032</b>                        |
| <b>Annual emissions via years of depreciation (10 years)</b> |                      |                                        |        | <b>103.2</b>                       |

## Validation

Environmental impact analyses often involve relatively large margins of uncertainty. In the inventory of materials used and underlying manufacturing processes of the furniture, many assumptions were made that affect the final result. No large amount of literature research has been done on the environmental impacts of office furniture. A small number of results found are nevertheless highlighted below.

A University of Michigan study reports emissions of 114 kg CO<sub>2</sub>e for office chairs, and 220 kg CO<sub>2</sub>e for office tables.<sup>17</sup> The British agency FIRA reports 72 kg CO<sub>2</sub>e for office chairs, 36 kg CO<sub>2</sub>e for conference chairs.<sup>18</sup> *Medeiros et al.* calculated from a 2017 LCA that an office cabinet provides 122 kg CO<sub>2</sub>e.<sup>19</sup> A publication by *Ahrend* (the manufacturer of the UG's furniture) mentions how many CO<sub>2</sub> emissions were saved by TU Delft, which purchased refurbished furniture from *Ahrend*. There approximately 140 kg CO<sub>2</sub>e per piece of furniture was calculated,<sup>20</sup> which agrees reasonably well with the average value calculated in this analysis.

It is worth noting that the results from EAP seem structurally higher. It is recommended to interpret the results of this analysis carefully and to keep at least a 10% margin of error.

## Furniture footprint of FSE

For the calculation of the furniture carbon impact at FSE the inventory of NB4 was correlated through its area to the areas of all buildings of FSE. We further calculated the annual CO<sub>2</sub>e emissions through correlating the emissions to average years of depreciation of ten years, resulting in 103 tons CO<sub>2</sub>e annually. Afterwards the m<sup>2</sup> of office and meeting room space of each building at FSE was used to calculate the furniture footprint per building as well as the total, which corresponded to an annual CO<sub>2</sub>e footprint of 304 tons for FSE.

**Table S48:** Furniture carbon impact (tons CO<sub>2</sub>e) of FSE and contribution of each building.

| Building       | FNO per building (m <sup>2</sup> ) | Furniture (tons CO <sub>2</sub> e) |
|----------------|------------------------------------|------------------------------------|
| Nijenborgh 4   | 32 272                             | 103.2                              |
| Linnaeusborg   | 25 373                             | 81.1                               |
| Bernoulliborg  | 8591                               | 27.5                               |
| EAE            | 6040                               | 19.3                               |
| ZL25           | 7576                               | 24.2                               |
| Herdershut     | 389                                | 1.2                                |
| Lutjewad       | 169                                | 0.5                                |
| A. Deusinglaan | 10 871                             | 34.8                               |
| FEB/kapteyn    | 3669                               | 11.7                               |
| <b>Total</b>   | <b>94 950</b>                      | <b>303.6</b>                       |

### 2.7.10 Interviews and outreach

| #  | Publisher           | Date      | Journalist               | Title                                                           | Link                                                                                                                                                                                                          |
|----|---------------------|-----------|--------------------------|-----------------------------------------------------------------|---------------------------------------------------------------------------------------------------------------------------------------------------------------------------------------------------------------|
| 1  | Ukrant              | 30.06.21  | Laura Nederveen          | Labs should be greener                                          | <a href="https://ukrant.nl/magazine/labs-should-be-greener/?lang=en">https://ukrant.nl/magazine/labs-should-be-greener/?lang=en</a>                                                                           |
| 2  | Ukrant              | 21.11.22  | Eoin Gallagher           | Chemistry labs are going green                                  | <a href="https://ukrant.nl/chemistry-labs-are-going-green-the-drive-is-in-the-young-generations/?lang=en">https://ukrant.nl/chemistry-labs-are-going-green-the-drive-is-in-the-young-generations/?lang=en</a> |
| 3  | ScienceLinx         | 18.01.23  | Myrna Kooij              | Laboratories are going green                                    | <a href="https://www.rug.nl/sciencelinx/nieuws/2023/01/laboratories-are-going-green">https://www.rug.nl/sciencelinx/nieuws/2023/01/laboratories-are-going-green</a>                                           |
| 4  | MyUniversity        | 14.03.23  | <i>E. W. Zinkstok</i>    | LEAF project launch: six labs receive awards for sustainability | <a href="https://myuniversity.rug.nl/infonet/medewerkers/fse/announcements/leaf-project-launch">https://myuniversity.rug.nl/infonet/medewerkers/fse/announcements/leaf-project-launch</a>                     |
| 5  | Faculty Newsletter  | 20.03.23  | <i>E. W. Zinkstok</i>    | Seven labs receive LEAF awards for sustainability               | <a href="https://www.rug.nl/fse/news/seven-labs-receive-leaf-award">https://www.rug.nl/fse/news/seven-labs-receive-leaf-award</a>                                                                             |
| 6  | Chemisch 2 Weekblad | 13.04.23  | Renee Canrinus-Moezelaar | Lab moet zelf ook duurzamer werken                              | <a href="https://www.sciencelink.net/verdieping/lab-moet-zelf-ook-duurzamer-werken/21235.article">https://www.sciencelink.net/verdieping/lab-moet-zelf-ook-duurzamer-werken/21235.article</a>                 |
| 7  | Bionieuws           | 01.09.23  | Stijn van Schie          | Lab kan stuk duurzamer                                          | print                                                                                                                                                                                                         |
| 8  | YouTube             | 16.10. 23 | Green Lab RUG FSE        | Green Lab Movie                                                 | <a href="https://www.youtube.com/watch?v=Zk_CEmyHZZg">https://www.youtube.com/watch?v=Zk_CEmyHZZg</a>                                                                                                         |
| 9  | MyUniversity        | 30.10. 23 | <i>E. W. Zinkstok</i>    | Sustainable labs are on the rise: 46 labs now LEAF accredited   | <a href="https://myuniversity.rug.nl/infonet/medewerkers/fse/news/sustainable-labs-are-on-the-rise">https://myuniversity.rug.nl/infonet/medewerkers/fse/news/sustainable-labs-are-on-the-rise</a>             |
| 10 | ChemRxiv            | 01.12.23  | T. Freese <i>et al.</i>  | A guidebook for sustainability in laboratories                  | <a href="https://doi.org/10.26434/chemrxiv-2023-g3lmg-v2">https://doi.org/10.26434/chemrxiv-2023-g3lmg-v2</a>                                                                                                 |

### 3. References

1. J. Ciers, A. Mandic, L. D. Toth, and G. Op 't Veld, "Carbon Footprint of Academic Air Travel: A Case Study in Switzerland," *Sustain. Sci. Pract. Policy*, vol. 11, no. 1, p. 80, Dec. 2018.
2. S. van Ewijk, S. Chaudhary, and P. Berrill, "Estimating passenger emissions from airfares supports equitable climate action," *Environ. Res. Lett.*, vol. 18, no. 2, p. 024013, Jan. 2023.
3. "Sustainable business travel policy," 2023. <https://www.rug.nl/about-ug/profile/facts-and-figures/duurzaamheid/projecten/nieuw-zakelijk-reisbeleid?lang=en> (accessed Apr. 12, 2023).
4. <https://myuniversity.rug.nl/infonet/medewerkers/fse/fse-topics/sustainability/>
5. <https://www.rug.nl/about-ug/profile/facts-and-figures/duurzaamheid/roadmap-sustainability>
6. Van der Tak et al (2021), *The carbon footprint of astronomy research in the Netherlands*, *Nature Astronomy*, Vol. 5, p. 1195-1198; doi:10.1038/s41550-021-01552-4.
7. <https://www.rug.nl/about-ug/profile/facts-and-figures/duurzaamheid/praktischeinformatie/documenten>
8. Larsson et al (2019), *International and national climate policies for aviation: a review*, *Climate Policy*, 19:6, 787-799; DOI: 10.1080/14693062.2018.1562871.
9. Mariette et al (2022), *An open-source tool to assess the carbon footprint of research*, *Environ. Res.: Infrastruct. Sustain.*, 2, 035008; DOI: 10.1088/2634-4505/ac84a4.
10. Steg, L., Dreijerink, L., & Abrahamse, W. (2006). *Why are energy policies acceptable and effective?* *Environment and behaviour*, 38(1), 92-111.
11. Schuitema, G., & Steg, L. (2008). *The role of revenue use in the acceptability of transport pricing policies*. *Transportation Research Part F: Traffic Psychology and Behaviour*, 11(3), 221-231.
12. Schuitema, G., & Bergstad, C. J. (2018). *Acceptability of environmental policies*. *Environmental psychology: An introduction*, 295-306.
13. Schuitema, G., Steg, L., & Forward, S. (2010). *Explaining differences in acceptability before and acceptance after the implementation of a congestion charge in Stockholm*. *Transportation Research Part A: Policy and Practice*, 44(2), 99-109.
14. Israel, G.D. (1992) *Determining Sample Size*. University of Florida Cooperative Extension Service, Institute of Food and Agriculture Sciences, EDIS, Florida
15. Taherdoost, H. (2017), *Determining Sample Size; How to Calculate Survey Sample Size*. *International Journal of Economics and Management Systems*, Vol. 2.; <https://ssrn.com/abstract=3224205>
16. R. M. J. Benders, W. Louwes, and H. C. Moll, *EAP: Energy Analysis Program, Manual Version 3.0, IVEM Research Report no. 95*. s.n., 1998.
17. David V. Spitzley Bernhard A. Dietz Gregory A. Keoleian, "Life-Cycle Assessment of Office Furniture Products Final report on the study of three Steelcase office furniture products: Airtouch table, Garland desk, and Siento chair," Center for Sustainable Systems, University of Michigan, CSS06-11, 2006.
18. Furniture Industry Research Association, "A study into the feasibility of Benchmarking carbon footprints of furniture products." 2011.
19. D. L. Medeiros, A. O. do C. Tavares, Á. L. Q. R. e. S. Rapôso, and A. Kiperstok, "Life cycle assessment in the furniture industry: the case study of an office cabinet," *Int. J. Life Cycle Assess.*, vol. 22, no. 11, pp. 1823–1836, 2017.
20. Ahrend, "TU Delft bespaart tonnen CO<sub>2</sub> met gerefurbisht meubilair." <https://www.ahrend.com/nl/over-ahrend/stories/tu-delft-bespaart-tonnen-co2-met-gerefurbisht-meubilair/> (accessed 28 Nov., 2023).
21. Roggema, R. From nature-based to nature-driven: Landscape first for the design of moeder zernike in groningen. *Sustainability* **13**, 1–21 (2021).
